# Supplementary material for: Asymmetric binary-acid catalysis: a diastereo- and enantioselective oxa-Nazarov cyclization-Michael addition of conjugated 1,2-diketones
Source: Royal Society of Chemistry journal article supplement (doi:10.1039/d3qo00558e), 2023-01-01
Supplement: d3qo00558e1.pdf [file d3qo00558e1.pdf]

## Supporting Information

### Asymmetric binary-acid catalysis: a diastereo- and enantioselective oxa-Nazarov-cyclization Michael addition of conjugated 1,2-diketones

Yuan Tian, Mengdie Tang, Changshuo Lian, Ran Song, Daoshan Yang, and Jian Lv\*

Key Laboratory of Optic-electric Sensing and Analytical Chemistry for Life Science, MOE, College of Chemistry and Molecular Engineering, Qingdao University of Science & Technology, Qingdao, 266042, China

\*Email: lvjian@iccas.ac.cn

| TABLE OF CONTENTS                                            | PAGE |
|--------------------------------------------------------------|------|
| I. General Experimental Information.....                     | S2   |
| II. Optimization.....                                        | S3   |
| III. Experimental Procedures and Characterization Data ..... | S6   |
| IV. Control Experiments.....                                 | S34  |
| V. X-ray structure of <b>3d</b> .....                        | S39  |
| VI. NMR spectrum.....                                        | S41  |
| VII. HPLC Chart.....                                         | S73  |
| VIII. Reference.....                                         | S106 |

## I. General Experimental Information and Materials

All commercial reagents were used without further purification unless otherwise noted. Proton and carbon magnetic resonance spectra ( $^1\text{H}$  NMR and  $^{13}\text{C}$  NMR) were recorded on a Bruker Avance 500MHz spectrometer. Tetramethylsilane (TMS) served as the internal standard for  $^1\text{H}$  NMR, and  $\text{CDCl}_3$  served as the internal standard for  $^{13}\text{C}$  NMR.  $^1\text{H}$  NMR data were reported as follows: chemical shift, multiplicity (s = singlet, d = doublet, t = triplet, m = multiplet, td = triplet of doublet, dt = doublet of triplet, dd = doublet of doublet), coupling constants (Hz), and integration. Infrared Spectroscopy was conducted on Thermo Fisher Nicolet is10. High resolution mass spectra were obtained on an Ultima Global spectrometer with an ESI source. The enantiomeric excesses were determined by high-performance liquid chromatography (HPLC) analysis using as Shimadzu SPD-20A on Chiral Diacel Chiralpak AD-H, and OD-H columns. Optical rotations were measured on an INESA WZZ-2S. According to the known reference, compounds **2a-s**,<sup>1</sup> **2t-v**,<sup>2</sup> and **2w-x**<sup>3</sup> were prepared.

## II. Optimization

**Table S1.** Screening of Different Lewis Acids<sup>[a]</sup>

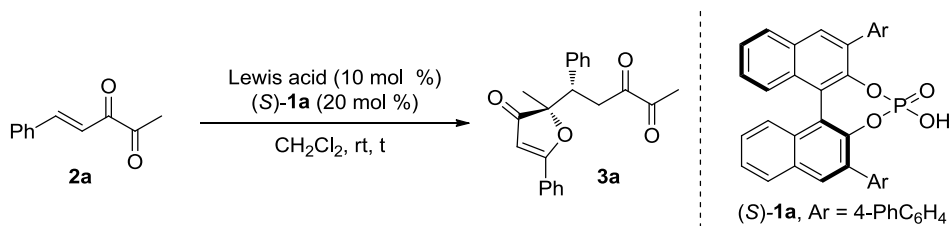

| Entry    | Lewis acid                       | t (h)     | Yield [%] <sup>[b]</sup> | ee [%] <sup>[c]</sup> |
|----------|----------------------------------|-----------|--------------------------|-----------------------|
| 1        | InBr <sub>3</sub>                | 24        | 94 (75:25)               | 23                    |
| 2        | InCl <sub>3</sub>                | 24        | 93 (67:33)               | 18                    |
| 3        | InI <sub>3</sub>                 | 24        | 94 (75:25)               | 27                    |
| 4        | In(OTf) <sub>3</sub>             | 24        | 91 (80:20)               | 13                    |
| 5        | Sc(OTf) <sub>3</sub>             | 24        | 94 (90:10)               | 25                    |
| 6        | Bi(OTf) <sub>3</sub>             | 6         | 93 (75:25)               | 3                     |
| <b>7</b> | <b>FeBr<sub>3</sub></b>          | <b>24</b> | <b>96 (80:20)</b>        | <b>56</b>             |
| 8        | FeCl <sub>3</sub>                | 24        | 95 (75:25)               | 56                    |
| 9        | HfCl <sub>4</sub>                | 48        | 91 (71:29)               | 5                     |
| 10       | Hf(OTf) <sub>4</sub>             | 48        | 21 (67:33)               | 37                    |
| 11       | Ni(OTf) <sub>2</sub>             | 48        | 32 (83:17)               | 63                    |
| 12       | Cu(OTf) <sub>2</sub>             | 24        | 94 (75:25)               | 27                    |
| 13       | Zn(OTf) <sub>2</sub>             | 48        | 93 (75:25)               | 38                    |
| 14       | AgBF <sub>4</sub>                | 48        | 64 (67:33)               | 17                    |
| 15       | Ph <sub>3</sub> CBF <sub>4</sub> | 48        | 92 (60:40)               | 34                    |

[a] Reaction conditions: **2a** (0.1 mmol), **1a** (20 mol %), Lewis acid (10 mol %) at room temperature in  $\text{CH}_2\text{Cl}_2$  (0.5 mL). [b] Isolated yield, diastereomeric ratio (in parenthesis) was determined by <sup>1</sup>H NMR. [c] Enantiomeric excess determined by chiral HPLC analysis.

**Table S2.** Screening of Other Different Lewis Acids<sup>[a]</sup>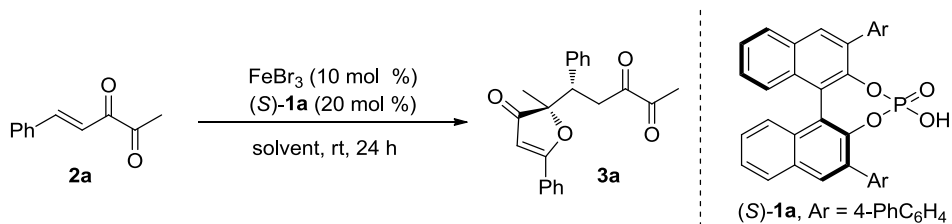

| Entry    | Solvent                                                       | Yield [%] <sup>[b]</sup> | ee [%] <sup>[c]</sup> |
|----------|---------------------------------------------------------------|--------------------------|-----------------------|
| <b>1</b> | <b>CH<sub>2</sub>Cl<sub>2</sub></b>                           | <b>96 (80:20)</b>        | <b>56</b>             |
| 2        | CHCl <sub>3</sub>                                             | 67 (60:40)               | 11                    |
| 3        | CH <sub>3</sub> CO <sub>2</sub> C <sub>2</sub> H <sub>5</sub> | 48 (67:33)               | 33                    |
| 4        | THF                                                           | NR                       | –                     |
| 5        | 1,4-dioxane                                                   | NR                       | –                     |
| 6        | Et <sub>2</sub> O                                             | Trace                    | –                     |
| 7        | MeCN                                                          | 37 (67:33)               | –                     |
| 8        | n-Hexane                                                      | 14 (67:33)               | 27                    |
| 9        | DMSO                                                          | NR                       | –                     |
| 10       | CH <sub>3</sub> OH                                            | NR                       | –                     |
| 11       | DMF                                                           | NR                       | –                     |
| 12       | Acetone                                                       | NR                       | –                     |

[a] Reaction conditions: **2a** (0.1 mmol), **1a** (20 mol %),  $\text{FeBr}_3$  (10 mol %) at room temperature in solvent (0.5 mL) for 24 h. [b] Isolated yield, diastereomeric ratio (in parenthesis) was determined by <sup>1</sup>H NMR. [c] Enantiomeric excess determined by chiral HPLC analysis.

**Table S3.** Screening of Different Chiral Phosphoric Acid<sup>[a]</sup>

Reaction scheme: **2a** (chalcone derivative) reacts with  $\text{FeBr}_3$  (10 mol %) and a chiral phosphoric acid catalyst (20 mol %) in  $\text{CH}_2\text{Cl}_2$  at room temperature for 24 hours to yield product **3a** (a bicyclic phosphoric acid derivative).

(S)-**1a**, Ar = 4-PhC<sub>6</sub>H<sub>4</sub>  
 (S)-**1b**, Ar = 4-(2-Nap)C<sub>6</sub>H<sub>4</sub>  
 (S)-**1c**, Ar = 4-CH<sub>3</sub>C<sub>6</sub>H<sub>4</sub>  
 (S)-**1d**, Ar = 1-Pyren  
 (S)-**1f**, Ar = 4-NO<sub>2</sub>C<sub>6</sub>H<sub>4</sub>  
 (S)-**1g**, Ar = 2,4,6-Me<sub>3</sub>C<sub>6</sub>H<sub>2</sub>  
 (S)-**1h**, Ar = 9-Anthryl

X = OH:  
 (S)-**1e**, Ar = 1-Pyren  
 (S)-**1i**, Ar = 4-PhC<sub>6</sub>H<sub>4</sub>  
 (S)-**1j**, Ar = 4-(2-Nap)C<sub>6</sub>H<sub>4</sub>  
 (S)-**1k**, Ar = 9-Anthryl  
 X = NHTf:  
 (S)-**1l** Ar = 1-Pyren

| Entry | Catalyst       | Yield [%] <sup>[b]</sup> | ee [%] <sup>[c]</sup> |
|-------|----------------|--------------------------|-----------------------|
| 1     | (S)- <b>1a</b> | 96 (80:20)               | 56                    |
| 2     | (S)- <b>1b</b> | 92 (89:11)               | 71                    |
| 3     | (S)- <b>1c</b> | 92 (85:15)               | 53                    |
| 4     | (S)- <b>1d</b> | 90 (83:17)               | 73                    |
| 5     | <b>(S)-1e</b>  | <b>89 (96:4)</b>         | <b>81</b>             |
| 6     | (S)- <b>1f</b> | 90 (83:17)               | 73                    |
| 7     | (S)- <b>1g</b> | 83 (80:20)               | 7                     |
| 8     | (S)- <b>1h</b> | 81 (80:20)               | 70                    |
| 9     | (S)- <b>1i</b> | 87 (86:14)               | 68                    |
| 10    | (S)- <b>1j</b> | 87 (88:12)               | 66                    |
| 11    | (S)- <b>1k</b> | 88 (88:12)               | 70                    |
| 12    | (S)- <b>1l</b> | 95 (80:20)               | 7                     |

[a] Reaction conditions: **2a** (0.1 mmol), catalyst (S)-**1** (20 mol %),  $\text{FeBr}_3$  (10 mol %) at room temperature in  $\text{CH}_2\text{Cl}_2$  (0.5 mL) for 24 h. [b] Isolated yield, diastereomeric ratio (in parenthesis) was determined by <sup>1</sup>H NMR. [c] Enantiomeric excess determined by chiral HPLC analysis.

### III. Experimental Procedures and Characterization Data

#### A) Synthesis of chiral *syn*-3(2*H*)-furanones:

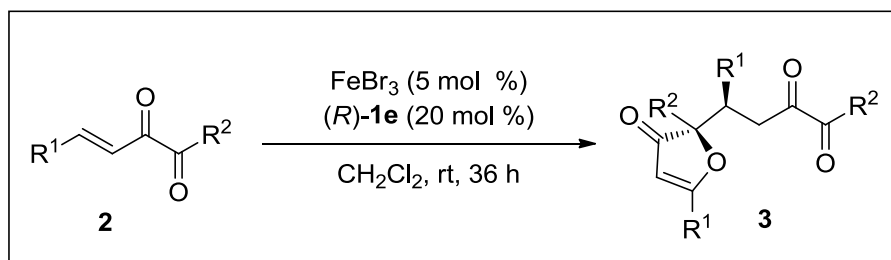

**General procedure I:** To a 10 mL Schlenk tube equipped with a magnetic stir bar was added FeBr<sub>3</sub> (0.005 mmol, 5 mol %) and chiral phosphoric acid (*R*)-1e (0.02 mmol, 20 mol %). The resulting mixture was sealed and degassed via vacuum evacuation and subsequent backfill with nitrogen for three times. Then anhydrous DCM (1.0 mL) was added. After stirring for 0.5 h, conjugated 1,2-diketones **2** (0.2 mmol) was added under nitrogen. The reaction mixture was stirred at room temperature for 36 h. After reaction, the mixture was directly loaded onto silica gel column and eluted with PE/EA (5:1) to give the chiral target product.

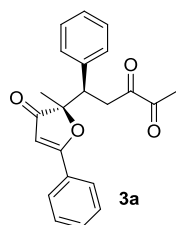

**(*R*)-5-((*S*)-2-methyl-3-oxo-5-phenyl-2,3-dihydrofuran-2-yl)-5-phenylpentane-2,3-dione **3a**:** Prepared according to the general procedure I above and purified by flash chromatography column with PE/EA (5:1) as the eluent. Yellow oil (34.5 mg, 99% yield, 90:10 dr, 96% ee for *syn*-**3a**); [ $\alpha$ ]<sub>D</sub><sup>30</sup> = +139.1 (c = 0.33 in CHCl<sub>3</sub>); <sup>1</sup>H NMR (500 MHz, CDCl<sub>3</sub>) <sup>1</sup>H NMR (500 MHz, CDCl<sub>3</sub>)  $\delta$  7.88 (d, *J* = 7.5 Hz, 2H), 7.75 (d, *J* = 7.5 Hz, 0.22 H), 7.63–7.60 (m, 1H), 7.56–7.53 (m, 2H), 7.49–7.47 (m, 0.33H), 7.39 (d, *J* = 7.5 Hz, 2H), 7.35–7.32 (m, 2H), 7.28 – 7.27 (m, 1H), 7.18 – 7.14 (m, 0.55H), 6.07 (s, 1H), 5.71 (s, 0.11H), 3.77 – 3.75 (m, 0.11H), 3.69 – 3.67 (m, 1H), 3.53–3.51 (m, 0.11H), 3.47–3.41 (m, 1.11H), 2.78–2.74 (m, 1H), 2.12 (s, 0.33H), 2.06 (s, 3H), 1.49 (s, 0.33H),

1.25 (s, 3H) ppm; major isomer *syn-3a*:  $^{13}\text{C}$  NMR (125 MHz,  $\text{CDCl}_3$ )  $\delta$  205.8, 197.0, 196.7, 184.8, 138.4, 133.1, 129.5, 129.1, 128.5, 127.6, 127.3, 127.0, 100.6, 92.4, 46.2, 36.3, 23.4, 21.6, ppm; HRMS (ESI, quadrupole)  $m/z$ :  $(\text{M}+\text{Na})^+$  calcd for  $\text{C}_{22}\text{H}_{20}\text{NaO}_4$  371.1254, found 371.1259; HPLC analysis (*syn-3a*): Daicel Chiralpak AD-H column, hexane/*i*-PrOH = 85:15, flow rate = 1.0 mL/min,  $\lambda$  = 210 nm, 35 °C, retention time: 8.4 min (major), 9.0 min (minor).

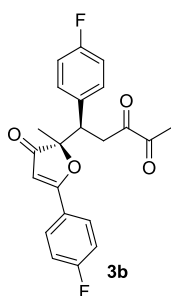

**(R)-5-(4-fluorophenyl)-5-((S)-5-(4-fluorophenyl)-2-methyl-3-oxo-2,3-dihydrofuran-2-yl)pentane-2,3-dione 3b**: Prepared according to the general procedure I above and purified by flash chromatography column with PE/EA (5:1) as the eluent. Yellow oil (37.3 mg, 97% yield, 90:10 dr, 95% ee for *syn-3b*);  $[\alpha]_{\text{D}}^{30} = +162.7$  ( $c = 0.36$  in  $\text{CHCl}_3$ );  $^1\text{H}$  NMR (500 MHz,  $\text{CDCl}_3$ )  $\delta$  7.88 (dd,  $J = 8.0, 5.5$  Hz, 2H), 7.78 – 7.76 (m, 0.33H), 7.35 (dd,  $J = 8.0, 6.0$  Hz, 2H), 7.28-7.13 (m, 2.55H), 7.02 (t,  $J = 8.5$  Hz, 2H), 6.83 (t,  $J = 8.5$  Hz, 0.22H), 6.01 (s, 1H), 5.67 (s, 0.11H), 3.75 (dd,  $J = 9.5, 5.5$  Hz, 0.11H), 3.69 (dd,  $J = 11.0, 3.0$  Hz, 1H), 3.53 (dd,  $J = 17.5, 9.5$  Hz, 0.11H), 3.46 – 3.40 (m, 1.11H), 2.77 (dd,  $J = 18.0, 3.5$  Hz, 1H), 2.17 (s, 0.33H), 2.12 (s, 3H), 1.48 (s, 0.33H), 1.25 (s, 3H) ppm; major isomer *syn-3b*:  $^{13}\text{C}$  NMR (125 MHz,  $\text{CDCl}_3$ )  $\delta$  205.3, 196.8, 196.3, 183.5, 165.6 (d,  $^1J_{\text{C-F}} = 254.1$  Hz), 162.1 (d,  $^1J_{\text{C-F}} = 245.0$  Hz), 134.0 (d,  $^4J_{\text{C-F}} = 3.1$  Hz), 130.9 (d,  $^3J_{\text{C-F}} = 7.5$  Hz), 129.6 (d,  $^3J_{\text{C-F}} = 8.9$  Hz), 124.8 (d,  $^4J_{\text{C-F}} = 3.0$  Hz), 116.4 (d,  $^2J_{\text{C-F}} = 22.3$  Hz), 115.4 (d,  $^2J_{\text{C-F}} = 21.1$  Hz), 100.4, 92.4, 45.4, 36.4, 23.4, 21.6 ppm; HRMS (ESI, quadrupole)  $m/z$ :  $(\text{M}+\text{Na})^+$  calcd for  $\text{C}_{22}\text{H}_{18}\text{F}_2\text{NaO}_4$  407.1065, found 407.1064; HPLC analysis (*syn-3b*): Daicel Chiralpak AD-H column, hexane/*i*-PrOH = 85:15, flow rate = 1.0 mL/min,  $\lambda$  = 210 nm, 35 °C, retention time: 9.3 min (major), 10.7 min (minor).

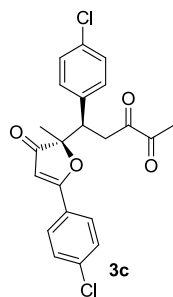

**(R)-5-(4-chlorophenyl)-5-((S)-5-(4-chlorophenyl)-2-methyl-3-oxo-2,3-dihydrofuran-2-yl)pentane-2,3-dione 3c:** Prepared according to the general procedure I above and purified by flash chromatography column with PE/EA (5:1) as the eluent. Yellow oil (38.4 mg, 92% yield, 90:10 dr, 96% ee for *syn*-**3c**);  $[\alpha]_D^{30} = +163.4$  (c = 0.45 in  $\text{CHCl}_3$ );  $^1\text{H NMR}$  (500 MHz,  $\text{CDCl}_3$ )  $\delta$  7.79 (d,  $J = 8.0$  Hz, 2H), 7.69 (d,  $J = 8.5$  Hz, 0.22H), 7.52 (d,  $J = 8.5$  Hz, 2H), 7.47 (d,  $J = 8.0$  Hz, 0.22H), 7.31 (s, 4H), 7.11 (s, 0.44H), 6.04 (s, 1H), 5.71 (s, 0.11H), 3.73 (dd,  $J = 9.5, 5.0$  Hz, 0.11H), 3.67 (dd,  $J = 11.0, 3.5$  Hz, 1H), 3.52 (dd,  $J = 18.0, 10.0$  Hz, 1H), 3.45 – 3.39 (m, 1.11H), 2.77 (dd,  $J = 18.0, 3.5$  Hz, 1H), 2.19 (s, 0.33H), 2.13 (s, 3H), 1.48 (s, 0.33H), 1.25 (s, 3H) ppm; major isomer *syn*-**3c**:  $^{13}\text{C NMR}$  (125 MHz,  $\text{CDCl}_3$ )  $\delta$  205.2, 196.7, 196.1, 183.4, 139.5, 136.8, 133.5, 130.7, 129.5, 128.7, 128.5, 126.9, 100.9, 92.3, 45.5, 44.7, 36.1, 26.9, 23.5, 21.6 ppm; HRMS (ESI, quadrupole)  $m/z$ :  $(\text{M}+\text{Na})^+$  calcd for  $\text{C}_{22}\text{H}_{18}\text{Cl}_2\text{NaO}_4$  439.0474, found 439.0474; HPLC analysis (*syn*-**3c**): Daicel Chiralpak AD-H column, hexane/*i*-PrOH = 85:15, flow rate = 1.0 mL/min,  $\lambda = 210$  nm, 35 °C, retention time: 10.4 min (major), 13.6 min (minor).

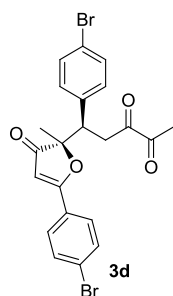

**(R)-5-(4-bromophenyl)-5-((S)-5-(4-bromophenyl)-2-methyl-3-oxo-2,3-dihydrofuran-2-yl)pentane-2,3-dione 3d:** Prepared according to the general procedure I above and purified by flash chromatography column with PE/EA (5:1) as the eluent. Yellow oil (47.9 mg, 95% yield, 84:16 dr, 96% ee for *syn*-**3d**);  $[\alpha]_D^{30} = +153.3$  (c = 0.62 in  $\text{CHCl}_3$ );



$^1\text{H}$  NMR (500 MHz,  $\text{CDCl}_3$ )  $\delta$  7.72 (d,  $J = 8.5$  Hz, 2H), 7.70 (d,  $J = 8.5$  Hz, 2H), 7.67 – 7.62 (m, 1.19H), 7.48 (d,  $J = 8.0$  Hz, 2H), 7.30-7.27 (m, 1.95H), 7.07 (d,  $J = 8.0$  Hz, 0.38H), 6.06 (s, 1H), 5.74 (s, 0.19H), 3.74 (dd,  $J = 9.5, 5.0$  Hz, 0.19H), 3.67 (dd,  $J = 11.0, 3.5$  Hz, 1H), 3.53 (dd,  $J = 17.5, 9.5$  Hz, 0.19H), 3.46 – 3.41 (m, 1.19H), 2.78 (dd,  $J = 18.0, 3.5$  Hz, 1H), 2.22 (s, 0.57H), 2.15 (s, 3H), 1.49 (s, 0.57H), 1.27 (s, 3H) ppm;  $^{13}\text{C}$  NMR (125 MHz,  $\text{CDCl}_3$ )  $\delta$  205.2, 204.8, 197.0, 196.7, 196.4, 196.1, 183.5, 182.5, 137.3, 136.6, 132.5, 132.4, 131.7, 131.3, 131.1, 130.7, 128.5, 128.4, 128.0, 127.4, 121.66, 121.65, 101.0, 100.6, 92.2, 91.2, 45.6, 44.8, 36.1, 35.6, 23.5, 23.4, 21.6, 19.9 ppm; HRMS (ESI, quadrupole)  $m/z$ :  $(\text{M}+\text{Na})^+$  calcd for  $\text{C}_{22}\text{H}_{18}\text{NaBr}_2\text{O}_4$  526.9464, found 526.9473; HPLC analysis (*syn-3d*): Daicel Chiralpak AD-H column, hexane/*i*-PrOH = 85:15, flow rate = 1.0 mL/min,  $\lambda = 210$  nm, 35 °C, retention time: 9.6 min (major), 12.1 min (minor).

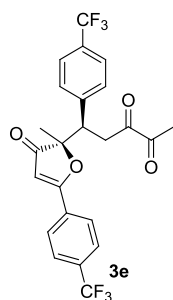

**(R)-5-((S)-2-methyl-3-oxo-5-(4-(trifluoromethyl)phenyl)-2,3-dihydrofuran-2-yl)-5-(4-(trifluoromethyl)phenyl)pentane-2,3-dione 3e**: Prepared according to the general procedure I above and purified by flash chromatography column with PE/EA (5:1) as the eluent. Yellow oil (45.1 mg, 93% yield, 84:16 dr, 90% ee for *syn-3e*);  $[\alpha]_{\text{D}}^{30} = +186.8$  ( $c = 0.54$  in  $\text{CHCl}_3$ );  $^1\text{H}$  NMR (500 MHz,  $\text{CDCl}_3$ )  $\delta$  8.00 (d,  $J = 8.0$  Hz, 2H), 7.89 (d,  $J = 8.5$  Hz, 0.38H), 7.84 (d,  $J = 8.5$  Hz, 2H), 7.79 (d,  $J = 8.0$  Hz, 0.38H), 7.63 (d,  $J = 8.5$  Hz, 2H), 7.54 (d,  $J = 8.0$  Hz, 2H), 7.45 (d,  $J = 8.0$  Hz, 0.38H), 7.34 (d,  $J = 8.0$  Hz, 0.38H), 6.18 (s, 1H), 5.84 (s, 0.19H), 3.86 (dd,  $J = 9.5, 5.0$  Hz, 0.19H), 3.80 (dd,  $J = 11.0, 3.5$  Hz, 1H), 3.60 (dd,  $J = 18.0, 9.0$  Hz, 0.19H), 3.55 – 3.48 (m, 1.19H), 2.85 (dd,  $J = 18.5, 3.5$  Hz, 1H), 2.24 (s, 0.57H), 2.17 (s, 3H), 1.53 (s, 0.57H), 1.30 (s, 3H) ppm; major isomer *syn-3e*  $^{13}\text{C}$  NMR (125 MHz,  $\text{CDCl}_3$ )  $\delta$  205.1, 196.6, 195.7, 182.8, 142.3, 134.5 (q,  $^2J_{\text{C-F}} =$

32.5 Hz), 131.7, 129.8, 127.5, 126.1 (d,  $^3J_{C-F} = 3.8$  Hz), 125.5 (d,  $^3J_{C-F} = 3.8$  Hz), 102.1, 92.3, 45.9, 36.0, 23.4, 21.6 ppm; HRMS (ESI, quadrupole) m/z: (M+Na)<sup>+</sup> calcd for C<sub>22</sub>H<sub>18</sub>F<sub>6</sub>NaO<sub>4</sub> 507.1001, found 507.1002; HPLC analysis (*syn-3e*): Daicel Chiralpak AD-H column, hexane/*i*-PrOH = 85:15, flow rate = 1.0 mL/min,  $\lambda = 210$  nm, 35 °C, retention time: 14.0 min (major), 15.2 min (minor).

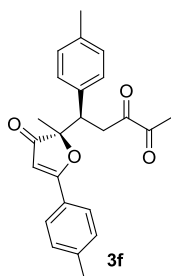

**(R)-5-((S)-2-methyl-3-oxo-5-(p-tolyl)-2,3-dihydrofuran-2-yl)-5-(p-tolyl)pentane-2,3-dione 3f:** Prepared according to the general procedure I above and purified by flash chromatography column with PE/EA (5:1) as the eluent. Yellow oil (32.7 mg, 87% yield, 86:14 dr, 96% ee for *syn-3f*);  $[\alpha]_D^{30} = +127.9$  (c = 0.31 in CHCl<sub>3</sub>); <sup>1</sup>H NMR (500 MHz, CDCl<sub>3</sub>)  $\delta$  7.69 (d,  $J = 8.0$  Hz, 2H), 7.57 (d,  $J = 8.0$  Hz, 0.32H), 7.26 (d,  $J = 8.0$  Hz, 2H), 7.21-7.18 (m, 2.32H), 7.06 (d,  $J = 7.5$  Hz, 2H), 6.99 (d,  $J = 7.5$  Hz, 0.32H), 6.87 (d,  $J = 7.8$  Hz, 0.32H), 5.94 (s, 1H), 5.60 (s, 0.16H), 3.63 (dd,  $J = 9.0, 6.0$  Hz, 0.16H), 3.55 (dd,  $J = 11.0, 3.5$  Hz, 1H), 3.44 – 3.37 (m, 0.32H), 3.32 (dd,  $J = 17.5, 11.0$  Hz, 1H), 2.65 (dd,  $J = 17.5, 3.5$  Hz, 1H), 2.39 (s, 3H), 2.36 (s, 0.48H), 2.25 (s, 3H), 2.14 (s, 0.48H), 2.04 (s, 0.48H), 1.98 (s, 3H), 1.39 (s, 0.48H), 1.15 (s, 3H) ppm; <sup>13</sup>C NMR (125 MHz, CDCl<sub>3</sub>)  $\delta$  205.8, 205.4, 197.5, 197.2, 197.1, 196.8, 184.9, 183.9, 144.0, 143.6, 137.2, 137.0, 135.3, 134.6, 129.8, 129.6, 129.4, 129.2, 129.0, 128.9, 127.3, 127.1, 126.0, 125.9, 100.0, 99.7, 92.4, 91.2, 45.8, 45.1, 36.4, 36.0, 23.5, 23.4, 21.81, 21.76, 21.6, 21.1, 21.0, 19.8 ppm; HRMS (ESI, quadrupole) m/z: (M+Na)<sup>+</sup> calcd for C<sub>24</sub>H<sub>24</sub>NaO<sub>4</sub> 399.1567, found 399.1568; HPLC analysis (*syn-3f*): Daicel Chiralpak AD-H column, hexane/*i*-PrOH = 85:15, flow rate = 1.0 mL/min,  $\lambda = 210$  nm, 35 °C, retention time: 8.5 min (major), 10.3 min (minor).

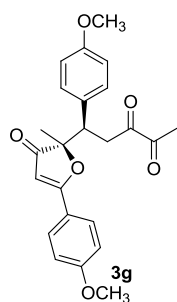

**(R)-5-(4-methoxyphenyl)-5-((S)-5-(4-methoxyphenyl)-2-methyl-3-oxo-2,3-dihydrofuran-2-yl)pentane-2,3-dione **3g**:** Prepared according to the general procedure I above and purified by flash chromatography column with PE/EA (2:1) as the eluent. Yellow oil (21.5 mg, 53% yield, 75:25 dr, 84% ee for *syn-3g*);  $[\alpha]_D^{30} = +117.9$  ( $c = 0.37$  in  $\text{CHCl}_3$ );  $^1\text{H NMR}$  (500 MHz,  $\text{CDCl}_3$ )  $\delta$  7.83 (d,  $J = 9.0$  Hz, 2H), 7.71 (d,  $J = 9.0$  Hz, 0.66H), 7.30 (d,  $J = 8.0$  Hz, 2H), 7.09 (d,  $J = 8.5$  Hz, 0.66H), 7.03 (d,  $J = 8.5$  Hz, 2H), 6.97 (d,  $J = 8.5$  Hz, 0.66H), 6.87 (d,  $J = 8.5$  Hz, 2H), 6.67 (d,  $J = 8.5$  Hz, 0.66H), 5.95 (s, 1H), 5.61 (s, 0.33H), 3.91 (s, 3H), 3.89 (s, 0.99H), 3.80 (s, 3H), 3.70 (s, 0.99H), 3.62 (dd,  $J = 10.5, 3.5$  Hz, 1H), 3.49 (dd,  $J = 17.5, 10.0$  Hz, 0.33H), 3.43 – 3.35 (m, 1.33H), 2.73 (dd,  $J = 17.5, 4.0$  Hz, 1H), 2.11 (s, 0.99H), 2.06 (s, 3H), 1.47 (s, 1H), 1.23 (s, 3H) ppm;  $^{13}\text{C NMR}$  (125 MHz,  $\text{CDCl}_3$ )  $\delta$  205.4, 205.1, 197.5, 197.4, 197.1, 197.0, 184.5, 183.6, 163.5, 158.9, 158.7, 130.6, 130.4, 130.2, 129.6, 129.3, 129.1, 121.2, 121.1, 114.5, 114.3, 113.8, 113.5, 99.0, 98.8, 92.5, 91.3, 55.6, 55.5, 55.2, 55.1, 45.5, 44.8, 36.5, 36.1, 23.5, 23.4, 21.6, 19.9 ppm; HRMS (ESI, quadrupole)  $m/z$ :  $(\text{M}+\text{Na})^+$  calcd for  $\text{C}_{24}\text{H}_{24}\text{NaO}_6$  431.1465, found 431.1467; HPLC analysis (*syn-3g*): Daicel Chiralpak AD-H column, hexane/*i*-PrOH = 85:15, flow rate = 1.0 mL/min,  $\lambda = 210$  nm, 35 °C, retention time: 16.2 min (major), 22.3 min (minor).

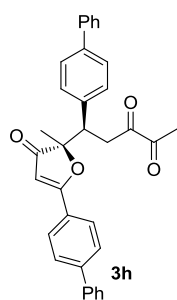

**(R)-5-([1,1'-biphenyl]-4-yl)-5-((S)-5-([1,1'-biphenyl]-4-yl)-2-methyl-3-oxo-2,3-dihydrofuran-2-yl)pentane-2,3-dione **3h**:**

**ofuran-2-yl)pentane-2,3-dione 3h:** Prepared according to the general procedure I above and purified by flash chromatography column with PE/EA (5:1) as the eluent. Yellow oil (49.1 mg, 98% yield, 83:17 dr, 92% ee for *syn-3h*);  $[\alpha]_D^{30} = +195.4$  ( $c = 0.45$  in  $\text{CHCl}_3$ );  $^1\text{H NMR}$  (500 MHz,  $\text{CDCl}_3$ )  $\delta$  7.96 (d,  $J = 8.5$  Hz, 2H), 7.83 (d,  $J = 8.5$  Hz, 0.40H), 7.77 (d,  $J = 8.0$  Hz, 2H), 7.71 (d,  $J = 8.0$  Hz, 0.40H), 7.66 (d,  $J = 7.5$  Hz, 2H), 7.60-7.58 (m, 4H), 7.52-7.42 (m, 5H), 7.45-7.42 (m, 4H), 7.37-7.27 (m, 1.80H), 6.11 (s, 1H), 5.77 (s, 0.2H), 3.82 (dd,  $J = 9.5, 5.5$  Hz, 0.2H), 3.76 (dd,  $J = 10.5, 3.5$  Hz, 1H), 3.59 (dd,  $J = 17.5, 9.0$  Hz, 0.2H), 3.53 – 3.48 (m, 1.2H), 2.82 (dd,  $J = 16.5, 3.5$  Hz, 1H), 2.16 (s, 0.6H), 2.10 (s, 3H), 1.53 (s, 0.6H), 1.32 (s, 3H) ppm;  $^{13}\text{C NMR}$  (125 MHz,  $\text{CDCl}_3$ )  $\delta$  205.6, 205.3, 197.4, 197.0, 196.6, 184.5, 183.5, 145.9, 145.6, 140.5, 140.4, 140.3, 140.1, 139.72, 139.70, 137.5, 136.8, 130.0, 129.6, 129.09, 129.05, 128.8, 128.7, 128.5, 128.4, 127.8, 127.7, 127.64, 127.55, 127.44, 127.40, 127.3, 127.22, 127.15, 127.0, 126.9, 126.8, 100.6, 100.3, 92.5, 91.3, 45.9, 45.2, 36.4, 36.0, 23.52, 23.45, 21.8, 20.0 ppm; HRMS (ESI, quadrupole)  $m/z$ :  $(\text{M}+\text{Na})^+$  calcd for  $\text{C}_{34}\text{H}_{28}\text{NaO}_4$  523.1880, found 523.1880; HPLC analysis (*syn-3h*): Daicel Chiralpak AD-H column, hexane/*i*-PrOH = 85:15, flow rate = 1.0 mL/min,  $\lambda = 210$  nm, 35 °C, retention time: 14.0 min (major), 23.2 min (minor).

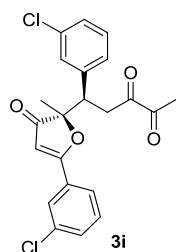

**(R)-5-(3-chlorophenyl)-5-((S)-5-(3-chlorophenyl)-2-methyl-3-oxo-2,3-dihydrofuran-2-yl)pentane-2,3-dione 3i:** Prepared according to the general procedure I above and purified by flash chromatography column with PE/EA (5:1) as the eluent. Yellow oil (37.2 mg, 89% yield, 87:13 dr, 91% ee for *syn-3i*);  $[\alpha]_D^{30} = +70.2$  ( $c = 0.40$  in  $\text{CHCl}_3$ );  $^1\text{H NMR}$  (500 MHz,  $\text{CDCl}_3$ )  $\delta$  7.83 (s, 1H), 7.74 (d,  $J = 8.0$  Hz, 1H), 7.62 (d,  $J = 8.0$  Hz, 0.15H), 7.59 (d,  $J = 7.5$  Hz, 1H), 7.54 (d,  $J = 6.5$  Hz, 0.15H), 7.50 (t,  $J = 7.5$  Hz, 1H), 7.44 (t,  $J = 8.0$  Hz, 0.15H), 7.38 (s, 1H), 7.29 – 7.25 (m, 3H), 7.18 (s, 0.15H), 7.15-7.07 (m,

0.45H), 6.07 (s, 1H), 5.74 (s, 0.15H), 3.76 – 3.71 (m, 0.15H), 3.67 (dd,  $J = 10.5, 3.5$  Hz, 1H), 3.51 – 3.47 (m, 0.30H), 3.42 (dd,  $J = 18.0, 11.0$  Hz, 1H), 2.79 (dd,  $J = 18.5, 3.5$  Hz, 1H), 2.22 (s, 0.45H), 2.16 (s, 3H), 1.48 (s, 0.45H), 1.27 (s, 3H) ppm; major isomer *syn-3i*:  $^{13}\text{C}$  NMR (125 MHz,  $\text{CDCl}_3$ )  $\delta$  205.2, 196.7, 195.9, 183.1, 140.3, 135.3, 134.3, 133.0, 130.4, 130.2, 129.8, 129.5, 127.9, 127.6, 127.1, 125.3, 101.5, 101.1, 92.3, 45.8, 36.1, 23.5, 21.6 ppm; HRMS (ESI, quadrupole)  $m/z$ :  $(\text{M}+\text{Na})^+$  calcd for  $\text{C}_{22}\text{H}_{18}\text{Cl}_2\text{NaO}_4$  439.0474, found 439.0474; HPLC analysis (*syn-3i*): Daicel Chiralpak AD-H column, hexane/*i*-PrOH = 85:15, flow rate = 1.0 mL/min,  $\lambda = 210$  nm, 35 °C, retention time: 17.6 min (major), 23.3 min (minor).

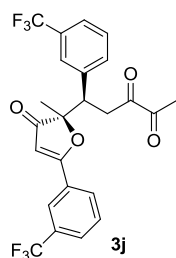

**(R)-5-((S)-2-methyl-3-oxo-5-(3-(trifluoromethyl)phenyl)-2,3-dihydrofuran-2-yl)-5-(3-(trifluoromethyl)phenyl)pentane-2,3-dione 3j**: Prepared according to the general procedure I above and purified by flash chromatography column with PE/EA (5:1) as the eluent. Yellow oil (41.1 mg, 85% yield, 86:14 dr, 91% ee for *syn-3j*);  $[\alpha]_{\text{D}}^{30} = +147.1$  ( $c = 0.39$  in  $\text{CHCl}_3$ );  $^1\text{H}$  NMR (500 MHz,  $\text{CDCl}_3$ )  $\delta$  8.10 (s, 1H), 8.03 (d,  $J = 8.0$  Hz, 1H), 7.99 (s, 0.16H), 7.92 (d,  $J = 8.0$  Hz, 0.16H), 7.89 (d,  $J = 7.5$  Hz, 1H), 7.84 (d,  $J = 7.5$  Hz, 0.16H), 7.73-7.70 (m, 2H), 7.68 – 7.63 (m, 0.32H), 7.6 (d,  $J = 7.5$  Hz, 1H), 7.56 (d,  $J = 8.0$  Hz, 1H), 7.50-7.45 (m, 1H), 7.45-7.40 (m, 0.32H), 7.36-7.33 (m, 0.16H), 6.14 (s, 1H), 5.81 (s, 0.16H), 3.87 (dd,  $J = 8.5, 5.5$  Hz, 0.16H), 3.81 (dd,  $J = 10.5, 3.5$  Hz, 1H), 3.63 – 3.55 (m, 0.32H), 3.50 (dd,  $J = 10.5, 19.0$  Hz, 1H), 2.92 (dd,  $J = 18.5, 3.5$  Hz, 1H), 2.25 (s, 0.48H), 2.18 (s, 3H), 1.52 (s, 0.48H), 1.32 (s, 3H) ppm; major isomer *syn-3j*:  $^{13}\text{C}$  NMR (125 MHz,  $\text{CDCl}_3$ )  $\delta$  205.0, 196.6, 195.8, 182.7, 139.2, 132.9, 131.9 (q,  $^1J_{\text{C-F}} = 32.5$  Hz), 130.9 (q,  $^1J_{\text{C-F}} = 32.5$  Hz), 129.8, 129.5 (q,  $^2J_{\text{C-F}} = 3.75$  Hz), 129.2, 129.0, 125.9, 124.5 ( $^2J_{\text{C-F}} = 3.75$  Hz), 123.7 ( $^2J_{\text{C-F}} = 3.75$  Hz), 122.8, 122.4, 101.7, 92.1, 45.9, 36.1, 23.4, 21.6 ppm; HRMS (ESI, quadrupole)  $m/z$ :  $(\text{M}+\text{Na})^+$  calcd for  $\text{C}_{22}\text{H}_{18}\text{F}_6\text{NaO}_4$

507.1001, found 507.1002; HPLC analysis (*syn-3j*): Daicel Chiralpak AD-H column, hexane/*i*-PrOH = 85:15, flow rate = 1.0 mL/min,  $\lambda$  = 210 nm, 35 °C, retention time: 13.3 min (major), 14.6 min (minor).

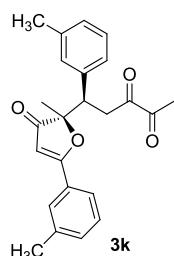

**(R)-5-((S)-2-methyl-3-oxo-5-(m-tolyl)-2,3-dihydrofuran-2-yl)-5-(m-tolyl)pentane-2,3-dione 3k:** Prepared according to the general procedure I above and purified by flash chromatography column with PE/EA (5:1) as the eluent. Yellow oil (29.8 mg, 74% yield, 86:14 dr, 91% ee for *syn-3k*);  $[\alpha]_D^{30} = +197.7$  (c = 0.27 in CHCl<sub>3</sub>); <sup>1</sup>H NMR (500 MHz, CDCl<sub>3</sub>)  $\delta$  7.71 – 7.70 (m, 2H), 7.59 – 7.57 (m, 0.32H), 7.48 – 7.41 (m, 2H), 7.39 (d, *J* = 5.0 Hz, 0.32H), 7.29 – 7.21 (m, 3H), 7.10 (d, *J* = 7.0 Hz, 1H), 7.07 – 6.96 (m, 0.64H), 6.07 (s, 1H), 5.71 (s, 0.16H), 3.73 (dd, *J* = 8.5, 5.5 Hz, 0.16H), 3.67 (dd, *J* = 10.5, 3.5 Hz, 1H), 3.57 – 3.50 (m, 0.32H), 3.45 (dd, *J* = 17.5, 10.5 Hz, 1H), 2.77 (dd, *J* = 17.5, 3.5 Hz, 1H), 2.49 (s, 3H), 2.46 (s, 0.48H), 2.38 (s, 3H), 2.18 (s, 0.48H), 2.15 (s, 0.48H), 2.09 (s, 3H), 1.50 (s, 0.48H), 1.27 (s, 3H) ppm; <sup>13</sup>C NMR (125 MHz, CDCl<sub>3</sub>)  $\delta$  205.8, 205.4, 197.5, 197.2, 197.1, 196.8, 185.0, 184.0, 138.9, 138.7, 138.3, 137.9, 137.6, 137.5, 133.8, 133.5, 130.5, 130.0, 128.9, 128.8, 128.7, 128.6, 128.34, 128.27, 128.2, 128.0, 127.7, 127.5, 126.4, 126.2, 124.5, 124.3, 100.6, 100.2, 92.3, 91.2, 46.2, 45.5, 36.4, 36.0, 23.5, 23.4, 21.6, 21.5, 21.42, 21.36, 21.2, 19.7 ppm; HRMS (ESI, quadrupole) *m/z*: (M+Na)<sup>+</sup> calcd for C<sub>24</sub>H<sub>24</sub>NaO<sub>4</sub> 399.1567, found 399.1568; HPLC analysis (*syn-3k*): Daicel Chiralpak AD-H column, hexane/*i*-PrOH = 85:15, flow rate = 1.0 mL/min,  $\lambda$  = 210 nm, 35 °C, retention time: 11.0 min (major), 19.7 min (minor).

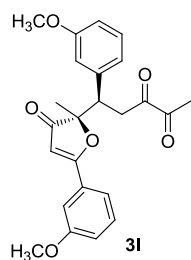

**(R)-5-(3-methoxyphenyl)-5-((S)-5-(3-methoxyphenyl)-2-methyl-3-oxo-2,3-dihydrofuran-2-yl)pentane-2,3-dione 3l:** Prepared according to the general procedure I above and purified by flash chromatography column with PE/EA (3:1) as the eluent. Yellow oil (27.5 mg, 68% yield, 90:10 dr, 85% ee for *syn*-**3l**);  $[\alpha]_D^{30} = +145.5$  ( $c = 0.45$  in  $\text{CHCl}_3$ );  $^1\text{H NMR}$  (500 MHz,  $\text{CDCl}_3$ )  $\delta$  7.47 – 7.43 (m, 2H), 7.38 (s, 1H), 7.38-7.35 (m, 0.11H), 7.27-7.23 (m, 1H), 7.15-7.13 (m, 1H), 7.10-7.07 (m, 0.33H), 6.97 (d,  $J = 7.5$  Hz 1H), 6.94 (s, 1H), 6.82-6.80 (m, 1H), 6.78-6.68 (m, 0.44H), 6.05 (s, 1H), 5.73 (s, 0.11H), 3.90 (s, 3H), 3.89 (s, 0.33H), 3.81 (s, 3H), 3.72 (dd,  $J = 9.0, 5.5$  Hz), 3.65 (dd,  $J = 10.5, 3.5$  Hz, 1H), 3.61 (s, 0.33H), 3.54-3.46 (m, 0.22H), 3.42 (dd,  $J = 17.5, 11.0$  Hz, 1H), 2.73 (dd,  $J = 17.5, 3.5$  Hz 1H), 2.14 (s, 0.33H), 2.08 (s, 3H), 1.48 (s, 0.33H), 1.26 (s, 3H) ppm; major isomer *syn*-**3l**:  $^{13}\text{C NMR}$  (125 MHz,  $\text{CDCl}_3$ )  $\delta$  205.7, 197.0, 196.6, 184.6, 160.0, 159.5, 139.9, 130.1, 129.9, 129.4, 121.9, 119.8, 119.7, 115.3, 112.9, 112.3, 100.9, 100.6, 92.4, 55.5, 55.1, 46.3, 36.3, 23.4, 21.6 ppm; HRMS (ESI, quadrupole)  $m/z$ :  $(\text{M}+\text{Na})^+$  calcd for  $\text{C}_{24}\text{H}_{24}\text{NaO}_6$  431.1465, found 431.1467; HPLC analysis (*syn*-**3l**): Daicel Chiralpak AD-H column, hexane/*i*-PrOH = 85:15, flow rate = 1.0 mL/min,  $\lambda = 210$  nm, 35 °C, retention time: 9.9 min (major), 13.1 min (minor).

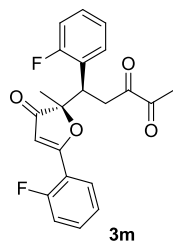

**(R)-5-(2-fluorophenyl)-5-((S)-5-(2-fluorophenyl)-2-methyl-3-oxo-2,3-dihydrofuran-2-yl)pentane-2,3-dione 3m:** Prepared according to the general procedure I above and purified by flash chromatography column with PE/EA (8:1) as the eluent. Yellow oil (29.6 mg, 77% yield, 88:12 dr, 92% ee for *syn*-**3m**);  $[\alpha]_D^{30} = +127.6$  ( $c = 0.33$  in  $\text{CHCl}_3$ );

$^1\text{H}$  NMR (500 MHz,  $\text{CDCl}_3$ )  $\delta$  7.95 – 7.92 (m, 1H), 7.90 – 7.87 (m, 0.13H), 7.64 – 7.54 (m, 1.13H), 7.38 (t,  $J = 7.5$  Hz, 1H), 7.35 (t,  $J = 7.5$  Hz, 1H), 7.31-7.29 (m, 0.26H), 7.27-7.20 (m, 2H), 7.20-7.18 (m, 0.26H), 7.15 (t,  $J = 7.5$  Hz, 1H), 7.08 (t,  $J = 9.0$  Hz, 1H), 7.03-6.99 (m, 0.26H), 6.24 (d,  $J = 3.5$  Hz, 1H), 6.03 (d,  $J = 3.5$  Hz, 0.13H), 4.17 – 4.13 (m, 1H), 3.61 – 3.56 (m, 0.13H), 3.52 – 3.42 (m, 1.13H), 2.87 (dd,  $J = 18.0, 3.5$  Hz, 1H), 2.22 (s, 0.39H), 2.14 (s, 3H), 1.48 (s, 0.39H), 1.31 (s, 3H) ppm; major isomer *syn-3m*:  $^{13}\text{C}$  NMR (125 MHz,  $\text{CDCl}_3$ )  $\delta$  205.0, 195.8, 195.5, 177.6 (d,  $^3J_{\text{C-F}} = 2.5$  Hz), 160.7 (d,  $^1J_{\text{C-H}} = 256.3$  Hz), 160.3 (d,  $^1J_{\text{C-H}} = 245.0$  Hz), 133.6 (d,  $J_{\text{C-H}} = 8.8$  Hz), 128.2 (d,  $J_{\text{C-H}} = 8.8$  Hz), 126.9, 124.3 (d,  $J_{\text{C-H}} = 13.8$  Hz), 123.7 (d,  $J_{\text{C-H}} = 3.8$  Hz), 123.3 (d,  $J_{\text{C-H}} = 3.8$  Hz), 116.2 (d,  $J = 10.0$  Hz), 115.7 (d,  $J = 22.5$  Hz), 114.5 (d,  $J = 22.5$  Hz), 104.4 (d,  $J = 12.5$  Hz), 89.2, 36.8, 34.4, 22.4, 20.1 ppm; HRMS (ESI, quadrupole)  $m/z$ :  $(\text{M}+\text{Na})^+$  calcd for  $\text{C}_{22}\text{H}_{18}\text{F}_2\text{NaO}_4$  407.1065, found 407.1064; HPLC analysis (*syn-3m*): Daicel Chiralpak OD-H column, hexane/*i*-PrOH = 85:15, flow rate = 1.0 mL/min,  $\lambda = 210$  nm, 35 °C, retention time: 10.9 min (major), 12.0 min (minor).

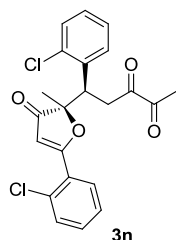

**(R)-5-(2-chlorophenyl)-5-((S)-5-(2-chlorophenyl)-2-methyl-3-oxo-2,3-dihydrofuran-2-yl)pentane-2,3-dione 3n**: Prepared according to the general procedure I above and purified by flash chromatography column with PE/EA (8:1) as the eluent. Yellow oil (31.6 mg, 76% yield, 90:10 dr, 90% ee for *syn-3n*);  $[\alpha]_{\text{D}}^{30} = +159.9$  ( $c = 0.44$  in  $\text{CHCl}_3$ );  $^1\text{H}$  NMR (500 MHz,  $\text{CDCl}_3$ )  $\delta$  7.89 (dd,  $J = 8.0, 1.5$  Hz, 1H), 7.88 – 7.83 (m, 0.11H), 7.59 – 7.57 (m, 1H), 7.54 – 7.51 (m, 1H), 7.48 – 7.43 (m, 3.22H), 7.41– 7.36 (m, 0.33H), 7.29 – 7.26 (m, 1H), 7.23-7.20 (m, 1H), 7.20 – 7.17 (m, 0.22H), 6.44 (s, 1H), 6.30 (s, 0.11H), 4.51-4.48 (m, 1.11H), 3.57-3.51 (m, 1.11H), 3.46-3.41 (m, 0.11H), 2.22 (s, 0.33H), 2.16 (s, 3H), 1.54 (s, 0.33H), 1.34 (s, 3H) ppm; major isomer *syn-3n*:  $^{13}\text{C}$  NMR (125 MHz,  $\text{CDCl}_3$ )  $\delta$  205.9, 196.8, 196.2, 181.5, 136.2, 135.9, 134.0, 133.0, 131.4, 129.7, 129.5, 129.0, 128.7, 127.9, 127.2, 127.1, 106.4, 91.0, 40.9, 36.3, 23.4, 20.9



ppm; HRMS (ESI, quadrupole)  $m/z$ :  $(M+Na)^+$  calcd for  $C_{22}H_{18}Cl_2NaO_4$  439.0474, found 439.0474; HPLC analysis (*syn-3n*): Daicel Chiralpak OD-H column, hexane/*i*-PrOH = 85:15, flow rate = 1.0 mL/min,  $\lambda$  = 210 nm, 35 °C, retention time: 5.4 min (major), 5.9 min (minor).

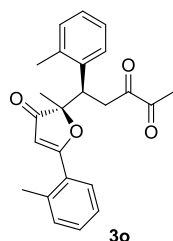

**(R)-5-((S)-2-methyl-3-oxo-5-(o-tolyl)-2,3-dihydrofuran-2-yl)-5-(o-tolyl)pentane-2,3-dione 3o**: Prepared according to the general procedure I above and purified by flash chromatography column with PE/EA (8:1) as the eluent. Yellow oil (25.2 mg, 67% yield, >95:5 dr, 91% ee for *syn-3o*);  $[\alpha]_D^{30} = +121.6$  ( $c = 0.64$  in  $CHCl_3$ );  $^1H$  NMR (500 MHz,  $CDCl_3$ )  $\delta$  7.75 (d,  $J = 8.0$  Hz, 1H), 7.46 (t,  $J = 7.5$  Hz, 1H), 7.38 – 7.32 (m, 3H), 7.16 – 7.12 (m, 3H), 5.93 (s, 1H), 4.04 (dd,  $J = 10.5, 3.5$  Hz, 1H), 3.54 (dd,  $J = 17.5, 10.5$  Hz, 1H), 2.80 (dd,  $J = 17.5, 4.0$  Hz, 1H), 2.53 (s, 3H), 2.52 (s, 3H), 2.04 (s, 3H), 1.25 (s, 3H) ppm;  $^{13}C$  NMR (125 MHz,  $CDCl_3$ )  $\delta$  206.3, 196.9, 196.9, 185.8, 137.93, 137.92, 137.1, 132.0, 131.9, 130.4, 128.8, 128.6, 127.7, 127.3, 126.4, 126.3, 104.9, 92.0, 40.3, 37.0, 23.3, 21.9, 21.1, 20.3 ppm; HRMS (ESI, quadrupole)  $m/z$ :  $(M+Na)^+$  calcd for  $C_{24}H_{24}NaO_4$  399.1567, found 399.1568; HPLC analysis (*syn-3o*): Daicel Chiralpak OD-H column, hexane/*i*-PrOH = 85:15, flow rate = 1.0 mL/min,  $\lambda$  = 210 nm, 35 °C, retention time: 8.2 min (major), 8.7 min (minor).

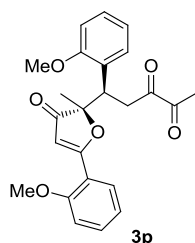

**(R)-5-(2-methoxyphenyl)-5-((S)-5-(2-methoxyphenyl)-2-methyl-3-oxo-2,3-dihydrofuran-2-yl)pentane-2,3-dione 3p**: Prepared according to the general procedure I above and purified by flash chromatography column with PE/EA (3:1) as the eluent. Yellow

oil (25.7 mg, 63% yield, 83:17 dr, 83% ee for *syn-3p*);  $[\alpha]_D^{30} = +134.6$  ( $c = 0.27$  in  $\text{CHCl}_3$ );  $^1\text{H NMR}$  (500 MHz,  $\text{CDCl}_3$ )  $\delta$  8.00 (d,  $J = 8.0$  Hz, 1H), 7.89 (d,  $J = 8.0$  Hz, 0.21H), 7.59 – 7.56 (m, 1H), 7.55 – 7.51 (m, 0.21H), 7.40 (d,  $J = 7.5$  Hz, 1H), 7.29 – 7.26 (m, 1.21H), 7.20 (t,  $J = 8.0$  Hz, 0.21H), 7.13 (t,  $J = 8.0$  Hz, 1H), 7.08 – 7.06 (m, 1.21H), 7.02 – 6.99. (m, 1.21H), 6.96 (d,  $J = 8.5$  Hz, 1H), 6.85-6.83 (m, 0.42H), 6.44 (s, 1H), 6.23 (s, 0.21H), 4.53 – 4.31 (m, 1.21H), 3.99 (s, 3H), 3.92 (s, 0.63H), 3.92 (s, 3H), 3.74 (s, 0.63H), 3.52 (m 0.21H), 3.38 – 3.33 (m, 1.21H), 2.81 (dd,  $J = 17.0, 4.0$  Hz, 1H), 2.14 (s, 0.63H), 2.05 (s, 3H), 1.47 (s, 0.64H), 1.24 (s, 3H) ppm;  $^{13}\text{C NMR}$  (125 MHz,  $\text{CDCl}_3$ )  $\delta$  207.5, 207.1, 197.5, 197.34, 197.29, 197.2, 180.6, 179.4, 159.4, 159.2, 158.0, 157.6, 134.1, 133.8, 128.44, 128.38, 128.2, 128.1, 120.71, 120.70, 120.5, 120.3, 117.8, 117.7, 111.5, 111.3, 110.9, 110.8, 105.6, 105.0, 90.1, 88.7, 60.4, 55.7, 55.6, 55.5, 36.6, 36.4, 36.1, 36.0, 23.43, 23.38, 20.8, 19.4 ppm; HRMS (ESI, quadrupole)  $m/z$ :  $(\text{M}+\text{Na})^+$  calcd for  $\text{C}_{24}\text{H}_{24}\text{NaO}_6$  431.1465, found 431.1467; HPLC analysis (*syn-3p*): Daicel Chiralpak OD-H column, hexane/*i*-PrOH = 85:15, flow rate = 1.0 mL/min,  $\lambda = 210$  nm, 35 °C, retention time: 15.7 min (major), 18.2 min (minor).

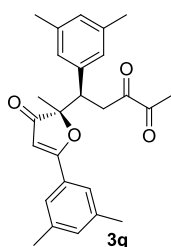

**(R)-5-(3,5-dimethylphenyl)-5-((S)-5-(3,5-dimethylphenyl)-2-methyl-3-oxo-2,3-dihydrofuran-2-yl)pentane-2,3-dione 3q**: Prepared according to the general procedure I above and purified by flash chromatography column with PE/EA (5:1) as the eluent. Yellow oil (38.4 mg, 95% yield, 86:14 dr, 93% ee for *syn-3q*);  $[\alpha]_D^{30} = +220.8$  ( $c = 0.62$  in  $\text{CHCl}_3$ );  $^1\text{H NMR}$  (500 MHz,  $\text{CDCl}_3$ )  $\delta$  7.48 (s, 2H), 7.36 (s, 0.32H), 7.24 (s, 1H), 7.18 (s, 0.16H), 6.99 (s, 2H), 6.90 (s, 1H), 6.80 (s, 0.32H), 6.77 (s, 0.16H), 6.01 (s, 1H), 5.70 (s, 0.16H), 3.65 (t,  $J = 7.5$  Hz, 0.16H), 3.59 (dd,  $J = 10.5, 3.5$  Hz, 1H), 3.47 (d,  $J = 7.5$  Hz, 0.32H), 3.39 (dd,  $J = 17.5, 10.5$  Hz, 1H), 2.73 (dd,  $J = 17.5, 3.5$  Hz, 1H), 2.42 (s, 6H), 2.41 (s, 0.96H), 2.35 (s, 6H), 2.17 (s, 0.48H), 2.16 (s, 0.96H), 2.10 (s, 3H), 1.49 (s, 0.48H), 1.27 (s, 3H) ppm;  $^{13}\text{C NMR}$  (125 MHz,  $\text{CDCl}_3$ )  $\delta$  206.0, 205.5, 197.6, 197.19,

197.15, 196.9, 185.2, 184.3, 138.7, 138.5, 138.2, 137.7, 137.5, 137.4, 134.7, 134.4, 129.2, 129.0, 128.7, 128.6, 127.5, 127.1, 125.0, 124.8, 100.4, 100.2, 92.2, 91.0, 46.0, 45.4, 36.4, 35.9, 23.50, 23.45, 21.7, 21.4, 21.3, 21.2, 21.1, 19.5 ppm; HRMS (ESI, quarupole) m/z: (M+Na)<sup>+</sup> calcd for C<sub>26</sub>H<sub>28</sub>NaO<sub>4</sub> 427.1880, found 427.1880; HPLC analysis (*syn-3q*): Daicel Chiralpak AD-H column, hexane/*i*-PrOH = 85:15, flow rate = 1.0 mL/min, λ = 210 nm, 35 °C, retention time: 15.0 min (major), 16.0 min (minor).

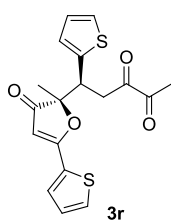

**(S)-5-((S)-2-methyl-3-oxo-5-(thiophen-2-yl)-2,3-dihydrofuran-2-yl)-5-(thiophen-2-yl)pentane-2,3-dione **3r**:** Prepared according to the general procedure I above and purified by flash chromatography column with PE/EA (5:1) as the eluent. Yellow oil (25.9 mg, 72% yield, 87:13 dr, 91% ee for *syn-3r*); [α]<sub>D</sub><sup>30</sup> = +194.0 (c = 0.31 in CHCl<sub>3</sub>); <sup>1</sup>H NMR (500 MHz, CDCl<sub>3</sub>) δ 8.05 (d, *J* = 2.5 Hz, 1H), 7.98 (d, *J* = 2.5 Hz, 0.15H), 7.49 – 7.47 (m, 1H), 7.45 – 7.42 (m, 1.15H), 7.33 (d, *J* = 5.5 Hz, 0.15H), 7.29 (dd, *J* = 5.0, 3.0 Hz, 1H), 7.19 – 7.18 (m, 1H), 7.13 – 7.10 (m, 1.15H), 7.02 (d, *J* = 3.0 Hz, 0.15H), 6.91 (d, *J* = 5.0 Hz, 0.15H), 5.86 (s, 1H), 5.56 (s, 0.15H), 3.88 (dd, *J* = 9.5, 5.0 Hz, 0.15H), 3.84 (dd, *J* = 11.0, 3.5 Hz, 1H), 3.45 (dd, *J* = 17.0, 9.5 Hz, 0.15H), 3.38 – 3.32 (m, 1.15H), 2.69 (dd, *J* = 17.0, 3.5 Hz, 1H), 2.15 (s, 0.45H), 2.10 (s, 3H), 1.45 (s, 0.45H), 1.27 (s, 3H) ppm; <sup>13</sup>C NMR (125 MHz, CDCl<sub>3</sub>) δ 205.3, 205.3, 197.3, 197.0, 196.7, 180.0, 179.1, 138.8, 138.2, 131.41, 131.35, 129.2, 128.8, 128.2, 128.1, 127.6, 127.4, 126.1, 126.0, 125.8, 125.2, 123.8, 123.3, 100.4, 100.0, 91.9, 90.8, 41.6, 41.2, 36.5, 26.2, 23.5, 23.4, 21.5, 19.7 ppm; HRMS (ESI, quarupole) m/z: (M+Na)<sup>+</sup> calcd for C<sub>18</sub>H<sub>16</sub>NaO<sub>4</sub>S<sub>2</sub> 383.0382, found 383.0386; HPLC analysis (*syn-3r*): Daicel Chiralpak AD-H column, hexane/*i*-PrOH = 85:15, flow rate = 1.0 mL/min, λ = 210 nm, 35 °C, retention time: 5.1 min (major), 6.4 min (minor).

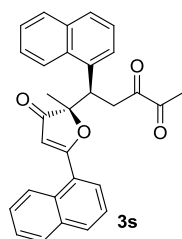

**(R)-5-((S)-2-methyl-5-(naphthalen-1-yl)-3-oxo-2,3-dihydrofuran-2-yl)-5-(naphthalen-1-yl)pentane-2,3-dione 3s:** Prepared according to the general procedure I above and purified by flash chromatography column with PE/EA (10:1) as the eluent. Yellow oil (28.7 mg, 64% yield, 85:15 dr, 90% ee for *syn-3s*);  $[\alpha]_D^{30} = +181.5$  ( $c = 0.34$  in  $\text{CHCl}_3$ );  $^1\text{H NMR}$  (400 MHz,  $\text{CDCl}_3$ )  $\delta$  8.47 (d,  $J = 8.8$  Hz, 1H), 8.33 (d,  $J = 8.8$  Hz, 0.18H), 8.24 – 8.21 (m, 1H), 8.04 (d,  $J = 8.0$  Hz, 1H), 8.00 (d,  $J = 8.4$  Hz, 0.18H), 7.96 – 7.90 (m, 1.36H), 7.85 (d,  $J = 8.0$  Hz, 1H), 7.77 (d,  $J = 7.2$  Hz, 2H), 7.70 (d,  $J = 8.4$  Hz, 0.18H), 7.66 – 7.62 (m, 2.18H), 7.58 – 7.52 (m, 4H), 7.50 (s, 0.36H), 7.48 (s, 0.36H), 7.46 (s, 0.18H), 7.44 – 7.40 (m, 1.18H), 7.20–7.15 (m, 0.18), 6.12 (s, 1H), 5.66 (s, 0.18H), 4.89 – 4.83 (m, 1.18H), 3.76 (dd,  $J = 17.6, 10.4$  Hz, 1H), 3.66 (dd,  $J = 8.8, 7.6$  Hz, 0.36H), 3.11 (dd,  $J = 17.2, 4.4$  Hz, 1H), 1.95 (s, 3H), 1.93 (s, 0.54H), 1.42 (s, 0.54H), 1.34 (s, 3H) ppm;  $^{13}\text{C NMR}$  (100 MHz,  $\text{CDCl}_3$ )  $\delta$  206.0, 205.0, 197.3, 197.1, 197.0, 196.8, 186.2, 184.7, 135.2, 134.5, 133.83, 133.78, 133.72, 133.7, 132.93, 132.90, 132.7, 132.2, 130.22, 130.15, 129.0, 128.9, 128.8, 128.5, 128.3, 128.2, 127.9, 127.8, 127.62, 127.57, 127.5, 127.0, 126.68, 126.65, 126.5, 126.3, 125.84, 125.80, 125.75, 125.7, 125.4, 125.0, 124.9, 124.8, 124.71, 124.68, 124.2, 123.7, 105.9, 105.7, 92.6, 91.0, 105.9, 105.7, 92.6, 90.9, 39.1, 37.9, 37.8, 37.4, 29.7, 26.9, 23.4, 21.8 ppm; HRMS (ESI, quarupole)  $m/z$ :  $(\text{M}+\text{Na})^+$  calcd for  $\text{C}_{30}\text{H}_{24}\text{NaO}_4$  448.1675, found 448.1667; HPLC analysis (*syn-3s*): Daicel Chiralpak AD-H column, hexane/*i*-PrOH = 85:15, flow rate = 1.0 mL/min,  $\lambda = 210$  nm, 35 °C, retention time: 10.3 min (major), 15.3 min (minor).

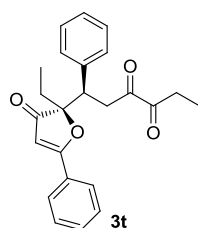

**(R)-1-((S)-2-ethyl-3-oxo-5-phenyl-2,3-dihydrofuran-2-yl)-1-phenylhexane-3,4-dione**

**3t**: Prepared according to the general procedure I above and purified by flash chromatography column with PE/EA (5:1) as the eluent. Yellow oil (37.3 mg, 99% yield, 94:6 dr, 93% ee for *syn-3t*);  $[\alpha]_D^{30} = +164.8$  ( $c = 0.56$  in  $\text{CHCl}_3$ ); major isomer *syn-3t*:  $^1\text{H NMR}$  (500 MHz,  $\text{CDCl}_3$ )  $\delta$  7.88 (d,  $J = 8.0$  Hz, 2H), 7.61 (t,  $J = 7.5$  Hz, 1H), 7.55 (t,  $J = 7.5$  Hz, 2H), 7.37 (d,  $J = 7.5$  Hz, 2H), 7.31 (t,  $J = 7.5$  Hz, 2H), 7.26-7.23 (m, 1H), 7.12 (d,  $J = 8.0$  Hz, 3H), 6.09 (s, 1H), 3.69 (dd,  $J = 11.0, 3.5$  Hz, 1H), 3.45 (dd,  $J = 17.0, 10.5$  Hz, 1H), 2.79 (dd, 17.0, 3.5 Hz, 1H), 2.45 – 2.41 (m, 2H), 1.83 – 1.75 (m, 1H), 1.62 – 1.53 (m, 1H), 0.87 (t,  $J = 7.2$  Hz, 3H), 0.70 (t,  $J = 7.4$  Hz, 3H) ppm; major isomer *syn-3t*:  $^{13}\text{C NMR}$  (125 MHz,  $\text{CDCl}_3$ )  $\delta$  205.4, 199.9, 197.3, 185.7, 138.4, 133.0, 129.6, 129.1, 128.5, 128.4, 127.5, 127.2, 102.7, 95.5, 46.4, 36.7, 29.2, 28.7, 7.0, 6.6 ppm; HRMS (ESI, quadrupole)  $m/z$ :  $(\text{M}+\text{Na})^+$  calcd for  $\text{C}_{24}\text{H}_{24}\text{NaO}_4$  399.1567, found 399.1572; HPLC analysis (*syn-3t*): Daicel Chiralpak AD-H column, hexane/*i*-PrOH = 85:15, flow rate = 1.0 mL/min,  $\lambda = 210$  nm, 35 °C, retention time: 15.9 min (major), 20.6 min (minor).

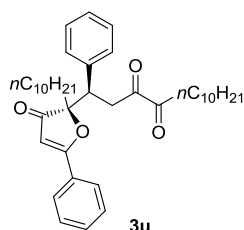

**(R)-1-((S)-2-decyl-3-oxo-5-phenyl-2,3-dihydrofuran-2-yl)-1-phenyltetradecane-3,4-dione 3u**: Prepared according to the general procedure I above and purified by flash chromatography column with PE/EA (20:1) as the eluent. Yellow oil (52.2 mg, 87% yield, 90:10 dr, 88% ee for *syn-3u*);  $[\alpha]_D^{30} = +126.8$  ( $c = 0.64$  in  $\text{CHCl}_3$ );  $^1\text{H NMR}$  (500 MHz,  $\text{CDCl}_3$ )  $\delta$  7.87 (d,  $J = 7.5$  Hz, 2H), 7.61 (t,  $J = 7.5$  Hz, 1H), 7.54 (t,  $J = 7.5$  Hz, 2H), 7.35 (d,  $J = 7.5$  Hz, 2H), 7.30 (t,  $J = 7.5$  Hz, 2H), 7.25 – 7.22 (m, 1H), 6.07 (s, 1H), 3.68 (dd,  $J = 11.0, 3.5$  Hz, 1H), 3.44 (dd,  $J = 17.0, 11.0$  Hz, 1H), 2.76 (dd,  $J = 17.0, 3.5$  Hz, 1H), 2.41 – 2.37 (m, 2H), 1.81 – 1.72 (m, 1H), 1.51 – 1.46 (m, 1H), 1.27 – 1.11 (m, 32H), 0.88 – 0.83 (m, 6H) ppm; major isomer **3u**:  $^{13}\text{C NMR}$  (125 MHz,  $\text{CDCl}_3$ )  $\delta$  205.5, 199.5, 197.4, 185.5, 138.3, 133.0, 129.6, 129.0, 128.6, 128.4, 127.5, 127.2, 102.6, 95.2, 46.6, 36.5, 35.7, 35.6, 31.9, 31.8, 29.6, 29.5, 29.42, 29.35, 29.3, 29.2, 29.0, 22.8,

22.64, 22.62, 14.1 ppm; HRMS (ESI, quadrupole)  $m/z$ :  $(M+Na)^+$  calcd for  $C_{40}H_{56}NaO_4$  623.4071, found 623.4079; HPLC analysis (*syn-3u*): Daicel Chiralpak AD-H column, hexane/*i*-PrOH = 85:15, flow rate = 1.0 mL/min,  $\lambda$  = 210 nm, 35 °C, retention time: 25.1 min (major), 31.7 min (minor).

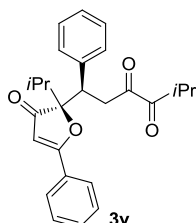

**(R)-1-((S)-2-isopropyl-3-oxo-5-phenyl-2,3-dihydrofuran-2-yl)-5-methyl-1-phenylhexane-3,4-dione **3v****: Prepared according to the general procedure I above and purified by flash chromatography column with PE/EA (15:1) as the eluent. Yellow oil (33.1 mg, 82% yield, 93:7 dr, 85% ee for *syn-3v*);  $[\alpha]_D^{30} = +398.8$  ( $c = 1.31$  in  $CHCl_3$ ); major isomer *syn-3v*  $^1H$  NMR (500 MHz,  $CDCl_3$ )  $\delta$  7.84 – 7.78 (m, 2H), 7.60 – 7.55 (m, 1H), 7.53 – 7.48 (m, 2H), 7.39 (d,  $J = 9.0$  Hz, 2H), 7.25 – 7.16 (m, 3H), 5.94 (s, 1H), 3.96 (dd,  $J = 14.5, 4.0$  Hz, 1H), 3.60 (dd,  $J = 21.5, 13.0$  Hz, 1H), 3.13-3.03 (m, 1H), 2.80 (dd,  $J = 21.5, 4.0$  Hz, 1H), 2.11 – 2.02 (m, 1H), 1.03 (d,  $J = 8.5$  Hz, 3H), 0.93 (d,  $J = 8.5$  Hz, 3H), 0.86 (d,  $J = 9.0$  Hz, 3H), 0.75 (d,  $J = 9.0$  Hz, 3H) ppm; major isomer *syn-3v*:  $^{13}C$  NMR (100 MHz,  $CDCl_3$ )  $\delta$  205.2, 202.5, 197.9, 185.1, 137.9, 132.8, 129.7, 128.9, 128.5, 128.2, 127.4, 127.1, 103.3, 96.6, 44.2, 36.9, 33.5, 32.5, 29.7, 17.1, 17.0, 16.4, 15.3 ppm; HRMS (ESI, quadrupole)  $m/z$ :  $(M+Na)^+$  calcd for  $C_{26}H_{28}NaO_4$  427.1885, found 427.1880; HPLC analysis (*syn-3v*): Daicel Chiralpak AD-H column, hexane/*i*-PrOH = 85:15, flow rate = 1.0 mL/min,  $\lambda$  = 210 nm, 35 °C, retention time: 16.5 min (major), 33.8 min (minor).

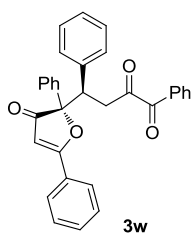

**(R)-4-((S)-3-oxo-2,5-diphenyl-2,3-dihydrofuran-2-yl)-1,4-diphenylbutane-1,2-dione**

**3w**: Prepared according to the general procedure I above and purified by flash chromatography column with PE/EA (6:1) as the eluent. Yellow oil (41.2 mg, 87% yield, <5:95 dr, 42% ee for *anti*-**3w**);  $[\alpha]_D^{30} = +93.6$  ( $c = 0.28$  in  $\text{CHCl}_3$ ); major isomer *anti*-**3w**:  $^1\text{H NMR}$  (500 MHz,  $\text{CDCl}_3$ )  $\delta$  7.85 (d,  $J = 9.0$  Hz, 2H), 7.78 (d,  $J = 9.5$  Hz, 2H), 7.59 (t,  $J = 9.0$  Hz, 1H), 7.53 – 7.40 (m, 7H), 7.36 – 7.25 (m, 5H), 7.07 (m, 3H), 5.58 (s, 1H), 4.38 (dd,  $J = 14.5, 5.0$  Hz, 1H), 3.72 (dd,  $J = 21.5, 14.5$  Hz, 1H), 3.10 (dd,  $J = 21.5, 5.0$  Hz, 1H) ppm; major isomer **3w**:  $^{13}\text{C NMR}$  (125 MHz,  $\text{CDCl}_3$ )  $\delta$  202.1, 200.6, 191.5, 184.0, 136.3, 136.1, 134.4, 133.0, 131.6, 130.2, 129.6, 129.2, 129.0, 128.64, 128.57, 128.5, 128.4, 127.8, 127.1, 125.0, 100.8, 93.7, 48.0, 39.4 ppm; HRMS (ESI, quadrupole)  $m/z$ :  $(\text{M}+\text{Na})^+$  calcd for  $\text{C}_{32}\text{H}_{24}\text{NaO}_4$  495.1567, found 495.1568; HPLC analysis (*anti*-**3w**): Daicel Chiralpak AD-H column, hexane/*i*-PrOH = 80:20, flow rate = 1.0 mL/min,  $\lambda = 210$  nm, 35 °C, retention time: 10.4 min (major), 17.0 min (minor).

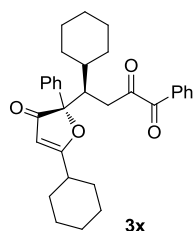

**(R)-4-cyclohexyl-4-((S)-5-cyclohexyl-3-oxo-2-phenyl-2,3-dihydrofuran-2-yl)-1-phenylbutane-1,2-dione 3x**: Prepared according to the general procedure I above and purified by flash chromatography column with PE/EA (20:1) as the eluent. Yellow oil as (13.1 mg, 27% yield, <5:95 dr, 64% ee for known compound *anti*-**3x**);  $[\alpha]_D^{30} = +53.0$  ( $c = 0.34$  in  $\text{CHCl}_3$ ); major isomer *anti*-**3x**:  $^1\text{H NMR}$  (500 MHz,  $\text{CDCl}_3$ )  $\delta$  7.56 (dd,  $J = 8.4$  Hz, 4H), 7.41 – 7.33 (m, 2H), 7.28 – 7.17 (m, 4H), 5.39 (s, 1H), 3.25 – 3.13 (m, 1H), 3.08 (s, 1H), 3.03 (d,  $J = 8.4$  Hz, 1H), 2.97 – 2.86 (m, 1H), 2.61 – 2.48 (m, 1H), 2.03 (d,  $J = 11.5$  Hz, 2H), 1.88 – 1.85 (m, 2H), 1.78 – 1.60 (m, 8H), 1.53 – 1.35 (m, 5H), 1.14 – 0.97 (m, 4H) ppm; major isomer **3x**:  $^{13}\text{C NMR}$  (125 MHz,  $\text{CDCl}_3$ )  $\delta$  204.0, 200.6, 196.3, 191.4, 137.5, 134.4, 131.7, 130.3, 128.6, 128.1, 125.0, 101.9, 95.2, 45.1, 40.0, 38.9, 35.0, 33.4, 30.0, 29.8, 29.2, 26.8, 26.5, 26.21, 25.7, 25.7, 25.6 ppm; HPLC analysis (*anti*-**3x**): Daicel Chiralpak AD-H column, hexane/*i*-PrOH = 80:20, flow rate = 1.0 mL/min,  $\lambda = 210$  nm, 35 °C, retention time: 10.2 min (minor), 13.7 min (major).

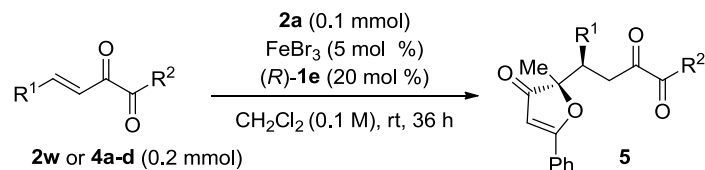

**General procedure II:** To a 10 mL Schlenk tube equipped with a magnetic stir bar was added  $\text{FeBr}_3$  (0.005 mmol, 5 mol %) and chiral phosphoric acid (*R*)-**1e** (0.02 mmol, 20 mol %). The resulting mixture was sealed and degassed via vacuum evacuation and subsequent backfill with nitrogen for three times. Then anhydrous DCM (1.0 mL) was added. After stirring for 0.5 h, conjugated 1,2-diketones **2a** (0.1 mmol) and **2w** or **4a-d** (0.2 mmol) were added under nitrogen. The reaction mixture was stirred at room temperature for 36 h. After reaction, the mixture was directly loaded onto silica gel column and eluted with PE/EA (3:1) to give the chiral target product.

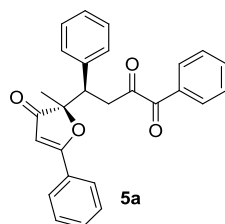

**(R)-4-((S)-2-methyl-3-oxo-5-phenyl-2,3-dihydrofuran-2-yl)-1,4-diphenylbutane-1,2-dione 5a:** Prepared according to the general procedure II above and purified by flash chromatography column with PE/EA (3:1) as the eluent. Yellow oil (28.4 mg, 77% yield, 82:18 dr, 87% ee for *syn*-**5a**);  $[\alpha]_{\text{D}}^{30} = +143.7$  ( $c = 0.34$  in  $\text{CHCl}_3$ );  $^1\text{H NMR}$  (500 MHz,  $\text{CDCl}_3$ )  $\delta$  7.86 (d,  $J = 7.5$  Hz, 2H), 7.74 (d,  $J = 8.0$  Hz, 0.44H), 7.60 (t,  $J = 7.0$  Hz, 1.22H), 7.57 – 7.45 (m, 6.32H), 7.40 (d,  $J = 7.5$  Hz, 2H), 7.32 – 7.28 (m, 4H), 7.25-7.22 (m, 1.22H), 7.20 – 7.15 (m, 0.44H), 7.07-7.04 (m, 0.66H), 6.07 (s, 1H), 5.69 (s, 0.22H), 3.86 (dd,  $J = 10.0, 5.5$  Hz, 0.22H), 3.81 (dd,  $J = 11.0, 3.0$  Hz, 1H), 3.71 – 3.62 (m, 0.44H), 3.49 (dd,  $J = 17.5, 11.5$  Hz, 1H), 3.04 (dd,  $J = 17.5, 3.5$  Hz, 1H), 1.57 (s, 0.66H), 1.29 (s, 3H) ppm; major isomer *syn*-**5a**:  $^{13}\text{C NMR}$  (125 MHz,  $\text{CDCl}_3$ )  $\delta$  204.6, 204.2, 199.6, 199.1, 190.6, 190.3, 183.7, 182.9, 137.1, 136.2, 133.4, 132.1, 131.8, 130.6, 129.2, 129.1, 128.7, 128.36, 128.1, 128.0, 127.7, 127.6, 127.3, 126.7, 126.6, 126.3, 126.1, 99.8, 99.4, 91.3, 90.4, 45.3, 44.5, 37.9, 37.8, 20.6, 19.2 ppm; HRMS (ESI, quadrupole)  $m/z$ :  $(\text{M}+\text{Na})^+$  calcd for  $\text{C}_{27}\text{H}_{22}\text{NaO}_4$  433.1416, found 433.1414; HPLC analysis (*syn*-**5a**):



Daicel Chiralpak AD-H column, hexane/*i*-PrOH = 75:25, flow rate = 1.0 mL/min,  $\lambda$  = 210 nm, 35 °C, retention time: 14.5 min (major), 18.6 min (minor).

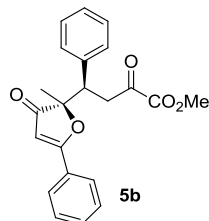

**(R)-methyl 4-((S)-2-methyl-3-oxo-5-phenyl-2,3-dihydrofuran-2-yl)-2-oxo-4-phenylbutanoate 5b:** Prepared according to the general procedure II above and purified by flash chromatography column with PE/EA (3:1) as the eluent. Yellow oil (25.1 mg, 72% yield, >95:5 dr, 84% ee for *syn*-**5b**);  $[\alpha]_D^{30} = +372.5$  ( $c = 1.21$  in  $\text{CHCl}_3$ ); major isomer *syn*-**5b**:  $^1\text{H NMR}$  (500 MHz,  $\text{CDCl}_3$ )  $\delta$  7.86 (d,  $J = 7.0$  Hz, 2H), 7.62 (t,  $J = 7.5$  Hz, 1H), 7.55 (t,  $J = 7.5$  Hz, 2H), 7.46 (d,  $J = 8.5$  Hz, 2H), 7.29 (d,  $J = 8.5$  Hz, 2H), 6.07 (s, 1H), 3.77 – 3.69 (m, 4H), 3.46 (dd,  $J = 18.5, 11.0$  Hz, 1H), 2.97 (dd,  $J = 18.5, 3.0$  Hz, 1H), 1.27 (s, 3H) ppm; major isomer *syn*-**5b**:  $^{13}\text{C NMR}$  (125 MHz,  $\text{CDCl}_3$ )  $\delta$  205.6, 191.1, 184.7, 160.9, 138.0, 133.1, 129.5, 129.1, 128.6, 128.5, 127.6, 127.2, 100.7, 92.3, 52.9, 46.1, 39.7, 21.6 ppm; HRMS (ESI, quadrupole)  $m/z$ :  $(\text{M}+\text{Na})^+$  calcd for  $\text{C}_{22}\text{H}_{20}\text{NaO}_5$  387.1208, found 387.1210; HPLC analysis (*syn*-**5b**): Daicel Chiralpak OD-H column, hexane/*i*-PrOH = 85:15, flow rate = 0.8 mL/min,  $\lambda = 210$  nm, 35 °C, retention time: 13.8 min (major), 14.8 min (minor).

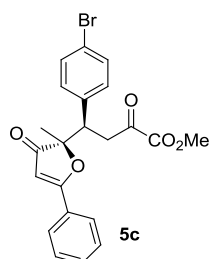

**(R)-methyl 4-(4-bromophenyl)-4-((S)-2-methyl-3-oxo-5-phenyl-2,3-dihydrofuran-2-yl)-2-oxobutanoate 5c:** Prepared according to the general procedure II above and purified by flash chromatography column with PE/EA (3:1) as the eluent. Yellow oil (36.3 mg, 76% yield, 91:9 dr, 88% ee for *syn*-**5c**);  $[\alpha]_D^{30} = +104.5$  ( $c = 0.87$  in  $\text{CHCl}_3$ );

major isomer *syn-5c*:  $^1\text{H}$  NMR (500 MHz,  $\text{CDCl}_3$ )  $\delta$  7.88 (d,  $J = 7.5$  Hz, 2H), 7.61 (t,  $J = 7.5$  Hz, 1H), 7.54 (t,  $J = 7.5$  Hz, 2H), 7.41 (d,  $J = 7.5$  Hz, 2H), 7.33 (t,  $J = 7.5$  Hz, 2H), 7.30 – 7.24 (m, 1H), 6.08 (s, 1H), 3.75 (dd,  $J = 11.0, 3.5$  Hz, 1H), 3.71 (s, 3H), 3.50 (dd,  $J = 18.0, 11.0$  Hz, 1H), 2.97 (dd,  $J = 18.0, 3.5$  Hz, 1H), 1.26 (s, 3H) ppm; major isomer *syn-5c*:  $^{13}\text{C}$  NMR (125 MHz,  $\text{CDCl}_3$ )  $\delta$  205.2, 190.9, 184.7, 160.8, 137.1, 133.2, 131.6, 131.1, 129.1, 128.5, 127.2, 121.7, 100.7, 91.9, 53.0, 45.5, 39.6, 21.6 ppm; HRMS (ESI, quarupole)  $m/z$ :  $(\text{M}+\text{Na})^+$  calcd for  $\text{C}_{22}\text{H}_{19}\text{BrNaO}_5$  465.0314, found 465.0313; HPLC analysis (*syn-5c*): Daicel Chiralpak AD-H column, hexane/*i*-PrOH = 85:15, flow rate = 1.0 mL/min,  $\lambda = 210$  nm, 35 °C, retention time: 13.4 min (major), 19.9 min (minor).

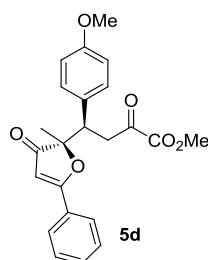

**(R)-methyl 4-(4-methoxyphenyl)-4-((S)-2-methyl-3-oxo-5-phenyl-2,3-dihydrofuran-2-yl)-2-oxobutanoate 5d**: Prepared according to the general procedure II above and purified by flash chromatography column with PE/EA (2:1) as the eluent. Yellow oil (14.0 mg, 34% yield, 89:11 dr, 90% ee for *syn-5d*);  $[\alpha]_{\text{D}}^{30} = +124.4$  ( $c = 0.27$  in  $\text{CHCl}_3$ ); major isomer *syn-5d*:  $^1\text{H}$  NMR (500 MHz,  $\text{CDCl}_3$ )  $\delta$  7.88 (d,  $J = 8.0$  Hz, 2H), 7.61 (t,  $J = 7.0$  Hz, 1H), 7.54 (t,  $J = 8.0$  Hz, 2H), 7.32 (d,  $J = 8.5$  Hz, 2H), 6.86 (d,  $J = 8.5$  Hz, 2H), 6.07 (s, 1H), 3.78 (s, 3H), 3.72 (s, 3H), 3.70-3.69 (m, 1H), 3.75 (dd,  $J = 11.0, 3.5$  Hz, 1H), 3.71 (s, 3H), 3.45 (dd,  $J = 18.0, 11.0$  Hz, 1H), 2.93 (dd,  $J = 18.0, 3.5$  Hz, 1H), 1.27 (s, 3H) ppm;  $^{13}\text{C}$  NMR (125 MHz,  $\text{CDCl}_3$ )  $\delta$  205.7, 205.3, 191.7, 191.3, 184.6, 183.7, 161.1, 160.9, 158.9, 158.8, 133.0, 132.7, 130.5, 130.2, 130.1, 129.9, 129.03, 128.9, 128.7, 127.21, 127.1, 113.8, 113.51, 100.7, 100.4, 92.6, 91.4, 55.2, 55.1, 53.0, 52.9, 45.4, 44.5, 39.8, 39.4, 21.6, 20.1, 14.2, 14.1 ppm; HRMS (ESI, quarupole)  $m/z$ :  $(\text{M}+\text{Na})^+$  calcd for  $\text{C}_{23}\text{H}_{22}\text{NaO}_6$  417.1314, found 417.1311; HPLC analysis (*syn-5d*): Daicel Chiralpak AD-H column, hexane/*i*-PrOH = 85:15, flow rate = 1.0 mL/min,  $\lambda = 210$  nm, 35 °C, retention time: 26.4 min (major), 30.7 min (minor).

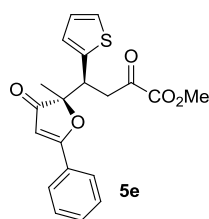

**(S)-methyl 4-((S)-2-methyl-3-oxo-5-phenyl-2,3-dihydrofuran-2-yl)-2-oxo-4-(thiophen-2-yl)butanoate 5e:** Prepared according to the general procedure II above and purified by flash chromatography column with PE/EA (3:1) as the eluent. Yellow oil (24.9 mg, 67% yield, 93:7 dr, 85% ee for *syn-5e*);  $[\alpha]_D^{30} = +89.8$  ( $c = 0.26$  in  $\text{CHCl}_3$ ); major isomer *syn-5e*:  $^1\text{H NMR}$  (500 MHz,  $\text{CDCl}_3$ )  $\delta$  7.87 (d,  $J = 7.5$  Hz, 2H), 7.61 (t,  $J = 7.5$  Hz, 1H), 7.54 (t,  $J = 8.0$  Hz, 2H), 7.28-7.27 (m, 1H), 7.23 (br, 1H), 7.15 (d,  $J = 5.0$  Hz, 1H), 6.06 (s, 1H), 3.93 (dd,  $J = 11.0, 3.0$  Hz, 1H), 3.73 (s, 3H), 3.40 (dd,  $J = 17.5, 11.0$  Hz, 1H), 2.92 (dd,  $J = 17.5, 3.5$  Hz, 1H), 1.31 (s, 3H) ppm;  $^{13}\text{C NMR}$  (125 MHz,  $\text{CDCl}_3$ )  $\delta$  205.4 191.1, 184.6, 160.9 138.4 133.1 129.1 128.6, 128.0, 127.2, 125.8 123.9, 100.7, 92.1, 52.9, 41.5, 39.8, 21.5 ppm; HRMS (ESI, quadrupole)  $m/z$ :  $(\text{M}+\text{Na})^+$  calcd for  $\text{C}_{20}\text{H}_{18}\text{NaO}_5\text{S}$  393.0773, found 393.0770; HPLC analysis (*syn-5e*): Daicel Chiralpak AD-H column, hexane/*i*-PrOH = 85:15, flow rate = 1.0 mL/min,  $\lambda = 210$  nm, 35 °C, retention time: 16.6 min (minor), 22.5 min (major).

## B) Gram-scale reaction:

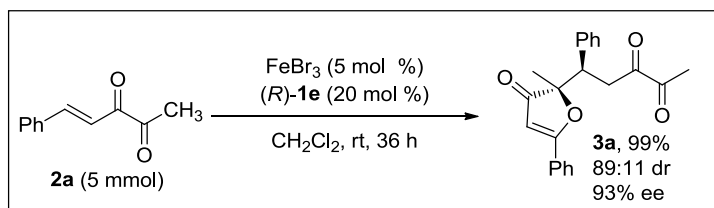

To a 10 mL Schlenk tube equipped with a magnetic stir bar was added  $\text{FeBr}_3$  (36.5 mg, 0.125 mmol, 5 mol %) and chiral phosphoric acid  $(R)\text{-1e}$  (379 mg, 0.5 mmol, 20 mol %). The resulting mixture was sealed and degassed via vacuum evacuation and subsequent backfill with nitrogen for three times. Then anhydrous DCM (25 mL) was added. After stirring for 0.5 h, conjugated 1,2-diketone **2a** (870 mg, 5 mmol) was added under nitrogen. The reaction mixture was stirred at room temperature for 36 h. After reaction, the mixture was directly loaded onto silica gel column and eluted with PE/EA (5:1) to give the chiral target product **3a** (861 mg, 99% yield, 89:11 dr, 93% ee for *syn-3a*).

### C) Transformation of chiral *syn*-3(2*H*)-furanone **3a**:

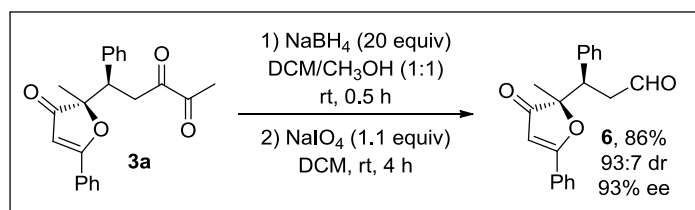

**Reaction procedure I:** NaBH<sub>4</sub> (378 mg, 10 mmol) was added to a solution of **3a** (174 mg, 0.5 mmol) in CH<sub>3</sub>OH/CH<sub>2</sub>Cl<sub>2</sub> (1:1, 5 mL) at 0 °C. The reaction mixture was stirred at room temperature for 30 min and then quenched with HCl (1.0 M). NaCl followed by extraction with CH<sub>2</sub>Cl<sub>2</sub>. The organic layer was washed with brine and dried over Na<sub>2</sub>SO<sub>4</sub>, filtered, and the solvent was concentrated under vacuum to give the crude diol, which was used for next step without further purification. To a solution of the crude diol in DCM (5 mL), was added NaIO<sub>4</sub> (118 mg, 0.55 mmol) at room temperature in an oven-dried round flask. The reaction mixture was stirred at room temperature for 4 h and then NaCl followed by extraction with CH<sub>2</sub>Cl<sub>2</sub>. The organic phase was washed with brine and dried over Na<sub>2</sub>SO<sub>4</sub>, the solvent was removed under vacuum. The crude product was purified by column chromatography on silica gel (eluted with PE/EA = 50:1) to afford a product **6** as a colorless oil (131.6 mg, 86% yield, 93:7 dr, 93% ee for *syn*-**6**).

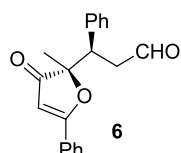

#### **(R)-3-((S)-2-methyl-3-oxo-5-phenyl-2,3-dihydrofuran-2-yl)-3-phenylpropanal** **6**:

Prepared according to the reaction procedure I above and purified by flash chromatography column with PE/EA (50:1) as the eluent. Colorless oil, 131.6 mg, 86% yield, 93:7 dr, 94% ee for *syn*-**6**); [ $\alpha$ ]<sub>D</sub><sup>30</sup> = +279.3 (c = 1.27 in CHCl<sub>3</sub>); <sup>1</sup>H NMR (500 MHz, CDCl<sub>3</sub>)  $\delta$  9.63 (s, 0.08H), 9.48 (s, 1H), 7.86 (d, *J* = 7.5 Hz, 2H), 7.73 (d, *J* = 7.7 Hz, 0.16H), 7.60 (t, *J* = 7.5 Hz, 1H), 7.53 (t, *J* = 7.5 Hz, 2H), 7.47 (t, *J* = 7.5 Hz, 0.16H), 7.40 (d, *J* = 7.5 Hz, 2H), 7.36 (t, *J* = 7.5 Hz, 2H), 7.30–7.27 (m, 1H), 7.24 (d, *J* = 5.0 Hz, 0.24 H), 7.18 (d, *J* = 4.0 Hz, 0.24H), 6.07 (s, 1H), 5.73 (s, 0.08H), 3.78 (dd, *J* = 10.0, 5.0 Hz, 0.08H), 3.70 (dd, *J* = 11.0, 4.0 Hz, 1H), 3.20–3.13 (m, 0.16H), 2.90–2.85 (m, 1H),

2.63 (d,  $J = 17.0, 4.0$  Hz, 1H), 1.51 (s, 0.24H), 1.30 (s, 3H) ppm; major isomer *syn-6*:  
 $^{13}\text{C}$  NMR (125 MHz,  $\text{CDCl}_3$ )  $\delta$  205.7, 199.9, 184.7, 138.1, 133.1, 129.3, 129.1, 128.7,  
128.6, 127.7, 127.2, 100.7, 92.2, 45.9, 43.6, 21.5 ppm; HRMS (ESI, quadrupole)  $m/z$ :  
( $\text{M}+\text{Na}$ ) $^+$  calcd for  $\text{C}_{20}\text{H}_{18}\text{NaO}_3$  329.1148, found 329.1147; HPLC analysis (*syn-6*):  
Daicel Chiralpak AD-H column, hexane/*i*-PrOH = 95:5, flow rate = 1.0 mL/min,  $\lambda = 210$   
nm, 35 °C, retention time: 6.8 min (major), 7.9 min (minor).

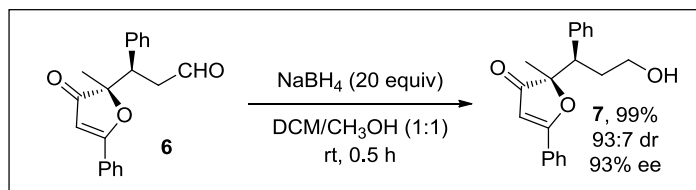

**Reaction procedure II:** NaBH<sub>4</sub> (226.8 mg, 6.0 mmol) was added to a solution of **6** (91.8 mg, 0.3 mmol) in CH<sub>3</sub>OH/CH<sub>2</sub>Cl<sub>2</sub> (1:1, 3 mL) at 0 °C. The reaction mixture was stirred at room temperature for 30 min and then quenched with HCl (1.0 M). NaCl followed by extraction with CH<sub>2</sub>Cl<sub>2</sub>. The organic layer was washed with brine and dried over Na<sub>2</sub>SO<sub>4</sub>, filtered, and the solvent was concentrated under vacuum to give the crude alcohol. The crude product was purified by column chromatography on silica gel (eluted with PE/EA = 1:1) to afford a product **7** as a white solid (91.8 mg, 99% yield, 94:6 dr, 91% ee for *syn-7*).

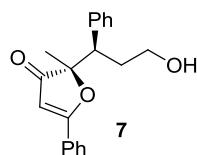

**(S)-2-((R)-3-hydroxy-1-phenylpropyl)-2-methyl-5-phenylfuran-3(2H)-one **7**:**

Prepared according to the reaction procedure II above and purified by flash chromatography column with PE/EA (1:1) as the eluent. Colorless oil, 91.8 mg, 99% yield, 93:7 dr, 92% ee for *syn-7*;  $[\alpha]_D^{30} = +163.9$  (c = 0.38 in CHCl<sub>3</sub>); <sup>1</sup>H NMR (500 MHz, CDCl<sub>3</sub>) δ 7.88 (d, *J* = 7.0 Hz, 2H), 7.74 (d, *J* = 7.5 Hz, 0.16H), 7.60 (t, *J* = 7.5 Hz, 1H), 7.54 (t, *J* = 7.5 Hz, 2H), 7.48 (t, *J* = 8.0 Hz, 0.16H), 7.39 (m, 4H), 7.312(m, 1.08H), 7.18 – 7.14 (m, 0.40H), 6.09 (s, 1H), 5.65 (s, 0.08H), 3.25–3.20 (m, 0.16H), 3.16 (dd, *J* = 12.0, 3.0 Hz, 1H), 3.08 – 3.03 (m, 1H), 2.95 – 2.90 (m, 1.08), 2.38 – 2.30 (m, 0.08H), 2.28 – 2.21 (m, 0.08H), 1.96 – 1.90 (m, 1H), 1.82 – 1.80 (m, 1H), 1.55 (s, 0.24H), 1.22 (s, 3H) ppm; major isomer *syn-7*: <sup>13</sup>C NMR (125 MHz, CDCl<sub>3</sub>) δ 206.2, 184.6, 138.1, 132.9, 129.4, 129.0, 128.8, 128.7, 127.6, 127.2, 100.6, 92.9, 49.4, 49.3, 28.8, 21.8 ppm; HRMS (ESI, quadrupole) *m/z*: (M+Na)<sup>+</sup> calcd for C<sub>20</sub>H<sub>20</sub>NaO<sub>3</sub> 331.1305, found 331.1305; HPLC analysis (*syn-5*): Daicel Chiralpak AD-H column, hexane/*i*-PrOH = 80:20, flow rate = 1.0 mL/min, λ = 210 nm, 35 °C, retention time: 8.5 min (major), 9.4 min (minor).

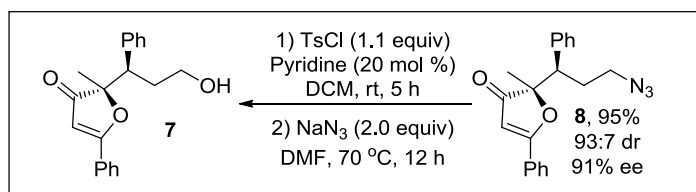

**Reaction procedure III:** TsCl (83.6 mg, 0.44 mmol) was added to a solution of **7** (125.3 mg, 0.4 mmol) in and pyridine (80  $\mu$ L, 20 mol %) in DCM (5 mL) at 0 °C. The reaction mixture was stirred for 5 hours at room temperature. After the reaction completed, it was poured into ice water. The organic layer was washed with 1 M HCl solution (10 mL  $\times$  2) and saturated aqueous Na<sub>2</sub>CO<sub>3</sub> (10 mL  $\times$  2). The organic layer was dried over anhydrous Na<sub>2</sub>SO<sub>4</sub>, filtered, and concentrated under vacuum to give the crude product, which was used directly in the next step without further purification.

Sodium azide (52 mg, 0.8 mmol) was added to a solution of the crude from the previous step in DMF (5 mL) under nitrogen atmosphere. The resulting mixture was stirred at 70 °C for 12 hours. Then the reaction was allowed to cool to room temperature and diluted with water (20 mL). The aqueous layer was extracted by EtOAc (20 mL  $\times$  3) and the combined organic layers were dried over Na<sub>2</sub>SO<sub>4</sub>. After the solvent was removed under reduced pressure, the crude product was purified by flash column chromatography on silica gel and eluted with petroleum ether/ethyl acetate (5/1) to afford product **8** (126.5 mg, 95% yield, 94:6 dr, 91% ee for *syn*-**8**).

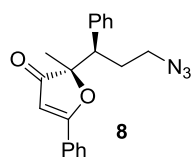

**(S)-2-((R)-3-azido-1-phenylpropyl)-2-methyl-5-phenylfuran-3(2H)-one 8:** Prepared according to the reaction procedure III above and purified by flash chromatography column with PE/EA (5:1) as the eluent. Colorless oil, 126.5 mg, 95% yield, 93:7 dr, 91% ee for *syn*-**8**;  $[\alpha]_D^{30} = +200.4$  ( $c = 1.35$  in CHCl<sub>3</sub>); <sup>1</sup>H NMR (500 MHz, CDCl<sub>3</sub>)  $\delta$  7.88 (d,  $J = 8.5$  Hz, 2H), 7.74 (d,  $J = 7.0$  Hz, 0.16H), 7.59 (t,  $J = 7.5$  Hz, 1H), 7.53 (t,  $J = 7.5$  Hz, 2H), 7.48 – 7.45 (m, 0.24H), 7.42 – 7.35 (m, 4H), 7.29 (t,  $J = 7.5$  Hz, 1H), 7.24 – 7.17 (m, 0.16H), 7.14 – 7.09 (m, 0.24H), 6.08 (s, 1H), 5.64 (s, 0.08H), 3.67 – 3.63 (m, 0.08H), 3.55 – 3.53 (m, 0.08H), 3.48 (dd,  $J = 9.1, 4.7$  Hz, 0.08H), 3.40 – 3.37 (m, 1H), 3.32 –



3.27 (m, 1H), 3.23 (dd,  $J = 12.0, 3.5$  Hz, 1H), 2.45 – 2.35 (m, 2H), 2.00 – 1.77 (m, 2H), 1.21 (s, 3H), 1.18 (s, 0.24H) ppm; major isomer *syn-8*:  $^{13}\text{C}$  NMR (125 MHz,  $\text{CDCl}_3$ )  $\delta$  206.2, 184.6, 138.0, 132.9, 129.4, 129.0, 128.8, 128.7, 127.6, 127.2, 100.7, 92.9, 49.4, 49.3, 28.8, 21.8 ppm; HRMS (ESI, quadrupole)  $m/z$ :  $(\text{M}+\text{Na})^+$  calcd for  $\text{C}_{20}\text{H}_{19}\text{N}_3\text{NaO}_2$  356.1369, found 356.1375; HPLC analysis (*syn-8*): Daicel Chiralpak OD-H column, hexane/*i*-PrOH = 90:10, flow rate = 1.0 mL/min,  $\lambda = 210$  nm, 35 °C, retention time: 9.5 min (major), 10.5 min (minor).

## IV. Control Experiments

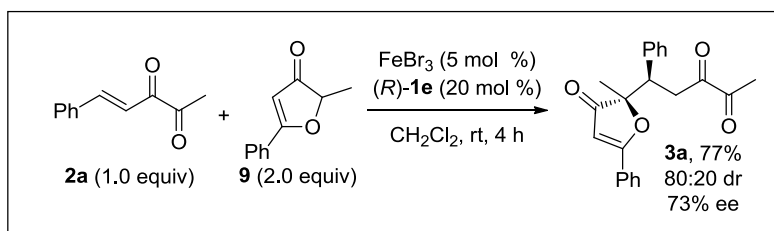

**A) Fe(III)/(R)-1e catalyzed Michael Addition of 2a with 9:** To a 10 mL Schlenk tube equipped with a magnetic stir bar was added  $\text{FeBr}_3$  (1.5 mg, 0.005 mmol, 5 mol %) and chiral phosphoric acid  $(R)\text{-1e}$  (11.5 mg, 0.02 mmol, 20 mol %). The resulting mixture was sealed and degassed via vacuum evacuation and subsequent backfill with nitrogen for three times. Then anhydrous DCM (1.0 mL) was added. After stirring for 0.5 h, conjugated 1,2-diketones **2a** (0.1 mmol) and **9** (0.2 mmol) was added under nitrogen. The reaction mixture was stirred at room temperature for 4 h. After reaction, the mixture was directly loaded onto silica gel column and eluted with PE/EA (5:1) to give the chiral target product **3a** (26.8 mg, 77% yield, 80:20 dr, 73% ee for *syn*-**3a**).

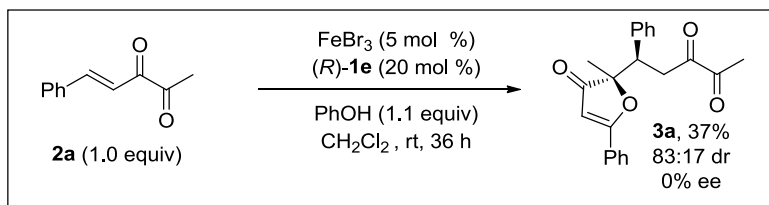

**B) Phenol as an acidic additive:** To a 10 mL Schlenk tube equipped with a magnetic stir bar was added  $\text{FeBr}_3$  (1.5 mg, 0.005 mmol, 5 mol %) and chiral phosphoric acid  $(R)\text{-1e}$  (11.5 mg, 0.02 mmol, 20 mol %). The resulting mixture was sealed and degassed via vacuum evacuation and subsequent backfill with nitrogen for three times. Then anhydrous DCM (1.0 mL) was added. After stirring for 0.5 h, conjugated 1,2-diketones **2a** (34.8 mg, 0.2 mmol) and  $\text{PhOH}$  (20.7 mg, 0.22 mmol) was added under nitrogen. The reaction mixture was stirred at room temperature for 36 h. After reaction, the mixture was directly loaded onto silica gel column and eluted with PE/EA (5:1) to give the chiral target product **3a** (12.9 mg, 37% yield, 83:17 dr, 0% ee for *syn*-**3a**). Compound **9** couldn't be observed.

C) Non-linear Effect:

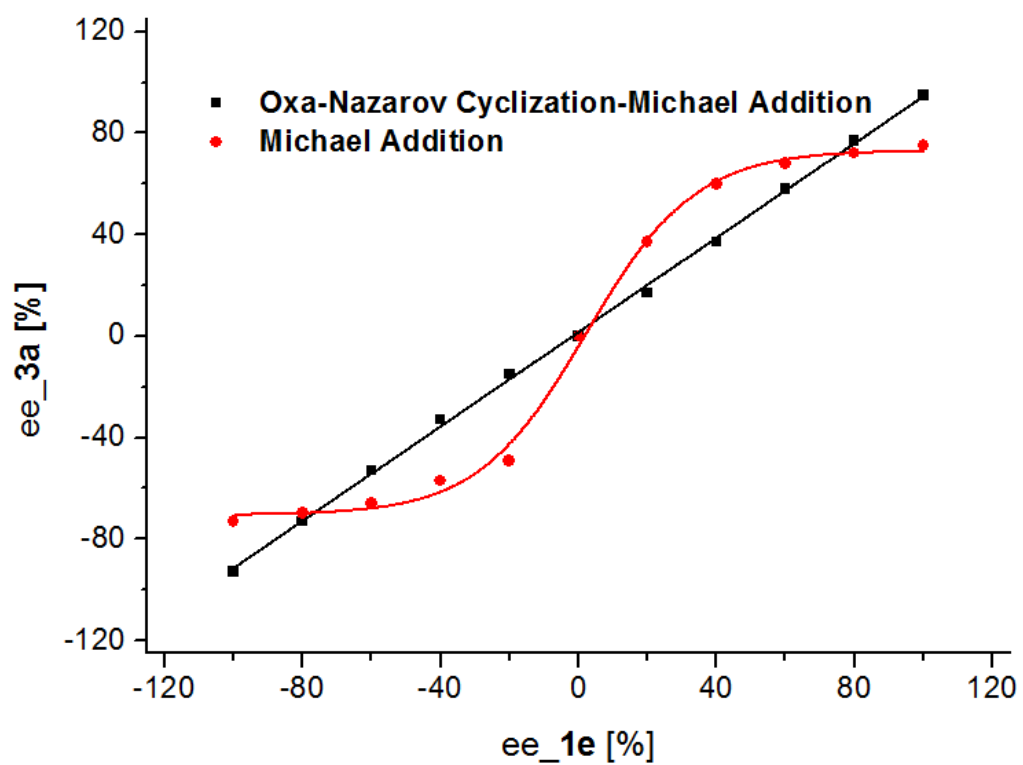

**Fig. S1.** Nonlinear effect in Oxa-Nazarov Cyclization-Michael Addition and direct Michael Addition.

#### D) ESI-MS Experiment

[(*R*)-**1e**]-FeBr<sub>3</sub>-**2a** system: To a 10 mL Schlenk tube equipped with a magnetic stir bar was added FeBr<sub>3</sub> (1.5 mg, 0.005 mmol) and chiral phosphoric acid (*R*)-**1e** (15.2 mg, 0.02 mmol). The resulting mixture was sealed and degassed via vacuum evacuation and subsequent backfill with nitrogen for three times. Then anhydrous DCM (1.0 mL) was added. After stirring for 0.5 h, conjugated 1,2-diketone **2a** (17.4 mg, 0.1 mmol) was added under nitrogen. After stirring for 1 h, an aliquot was diluted with CH<sub>3</sub>CN (CH<sub>3</sub>CN/CH<sub>2</sub>Cl<sub>2</sub> = 20:1) and subjected to analysis by ESI-MS.

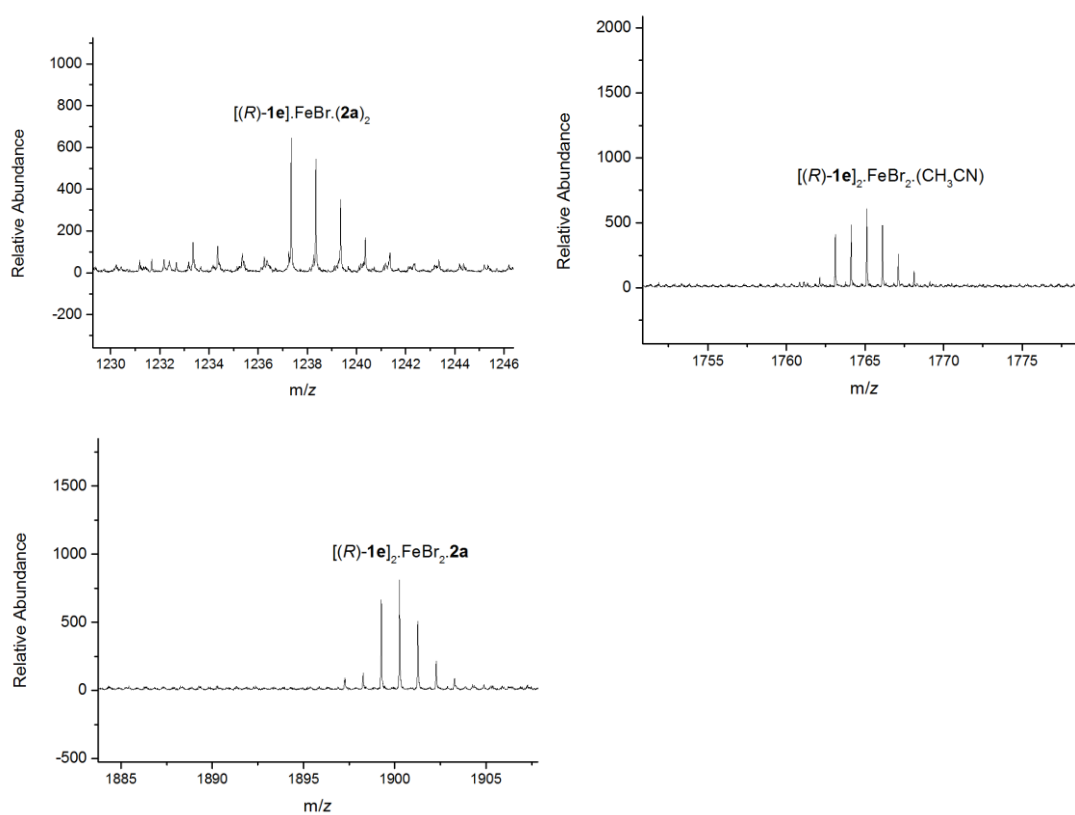

**Fig. S2.** ESI-MS analysis of a solution of [(*R*)-**1e**]-FeBr<sub>3</sub>-**2a** (4:1:20)

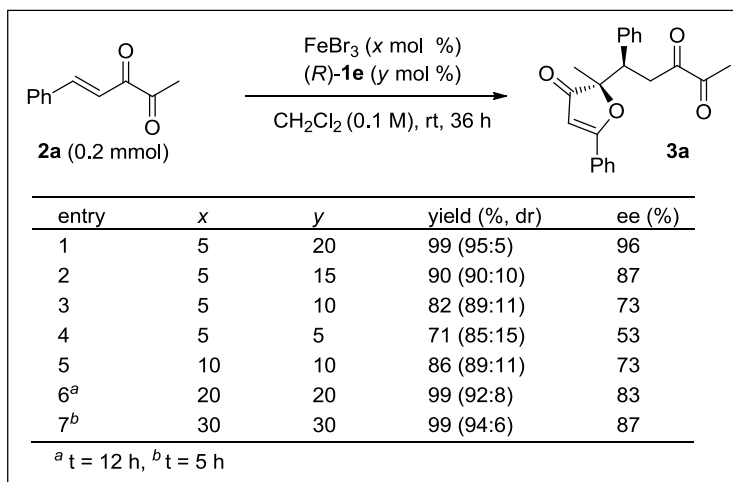

**E) Impact of the ratio of two acids:** To a 10 mL Schlenk tube equipped with a magnetic stir bar was added FeBr<sub>3</sub> (*x* mol %) and chiral phosphoric acid (*R*)-**1e** (*y* mol %). The resulting mixture was sealed and degassed via vacuum evacuation and subsequent backfill with nitrogen for three times. Then anhydrous DCM (1.0 mL) was added. After stirring for 0.5 h, conjugated 1,2-diketones **2a** (34.8 mg, 0.2 mmol) was added under nitrogen. The reaction mixture was stirred at room temperature for 36 h. After reaction, the mixture was directly loaded onto silica gel column and eluted with PE/EA (5:1) to give the chiral target product **3a**.

## V. X-ray structure of 3d

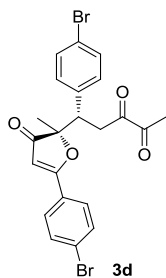

The crystal was cultivated from petrol ether/DCM (20:1) with volatilization method.

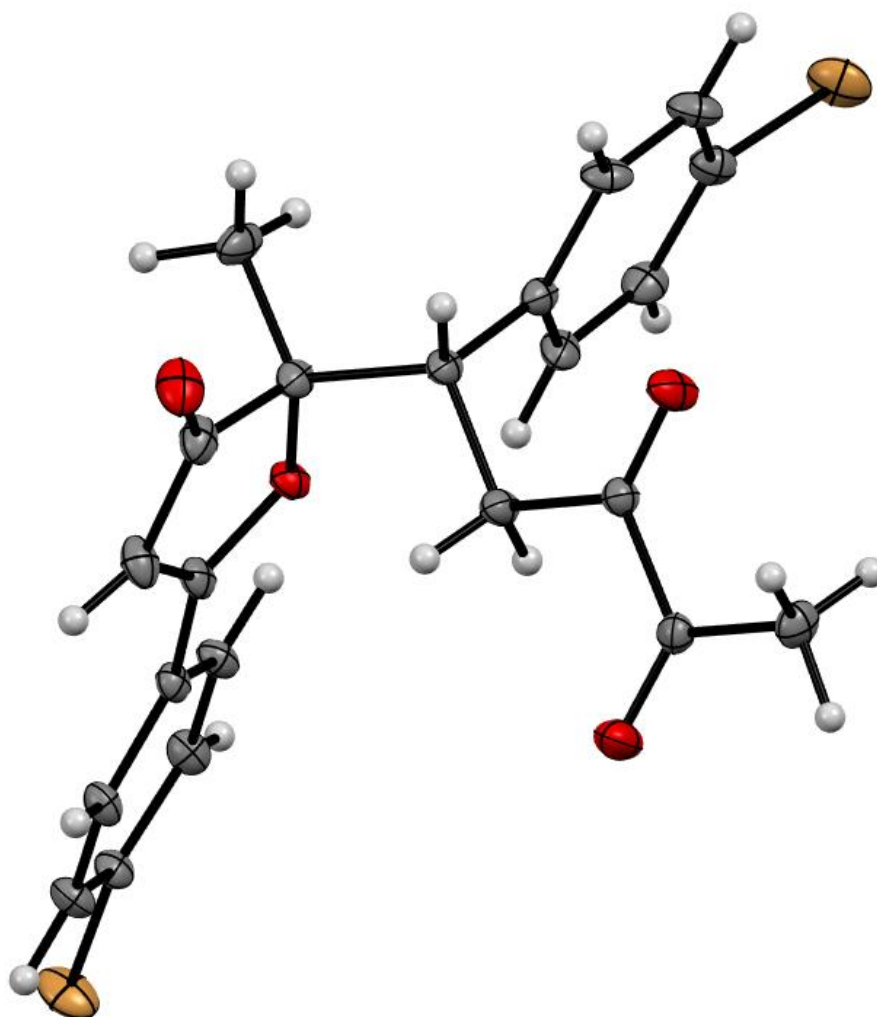

**Fig. S3.** ORTEP drawing of **3d** delated one CH<sub>2</sub>Cl<sub>2</sub> molecule at 30% ellipsoid probability (CCDC 2233765)

**Table S4.** Crystal data and structure refinement for **3d**

|                                             |                                                                                |
|---------------------------------------------|--------------------------------------------------------------------------------|
| Empirical formula                           | C <sub>45</sub> H <sub>38</sub> Br <sub>4</sub> Cl <sub>2</sub> O <sub>8</sub> |
| Formula weight                              | 1097.29                                                                        |
| Temperature/K                               | 169.95(10)                                                                     |
| Crystal system                              | monoclinic                                                                     |
| Space group                                 | I2                                                                             |
| a/Å                                         | 12.52272(12)                                                                   |
| b/Å                                         | 7.55112(7)                                                                     |
| c/Å                                         | 23.7108(2)                                                                     |
| α/°                                         | 90                                                                             |
| β/°                                         | 101.6582(9)                                                                    |
| γ/°                                         | 90                                                                             |
| Volume/Å <sup>3</sup>                       | 2195.85(4)                                                                     |
| Z                                           | 2                                                                              |
| ρ <sub>calc</sub> /cm <sup>3</sup>          | 1.660                                                                          |
| μ/mm <sup>-1</sup>                          | 6.028                                                                          |
| F(000)                                      | 1092.0                                                                         |
| Crystal size/mm <sup>3</sup>                | 0.26 × 0.25 × 0.21                                                             |
| Radiation                                   | CuKα (λ = 1.54184)                                                             |
| 2θ range for data collection/°              | 7.44 to 153.974                                                                |
| Index ranges                                | -15 ≤ h ≤ 15, -9 ≤ k ≤ 9, -29 ≤ l ≤ 27                                         |
| Reflections collected                       | 12625                                                                          |
| Independent reflections                     | 4439 [R <sub>int</sub> = 0.0231, R <sub>sigma</sub> = 0.0196]                  |
| Data/restraints/parameters                  | 4439/21/283                                                                    |
| Goodness-of-fit on F <sup>2</sup>           | 1.048                                                                          |
| Final R indexes [I >= 2σ (I)]               | R <sub>1</sub> = 0.0236, wR <sub>2</sub> = 0.0619                              |
| Final R indexes [all data]                  | R <sub>1</sub> = 0.0238, wR <sub>2</sub> = 0.0621                              |
| Largest diff. peak/hole / e Å <sup>-3</sup> | 0.47/-0.32                                                                     |
| Flack parameter                             | -0.011(7)                                                                      |



## VI. NMR Spectrum

### $^1\text{H}$ NMR (500 MHz, $\text{CDCl}_3$ )

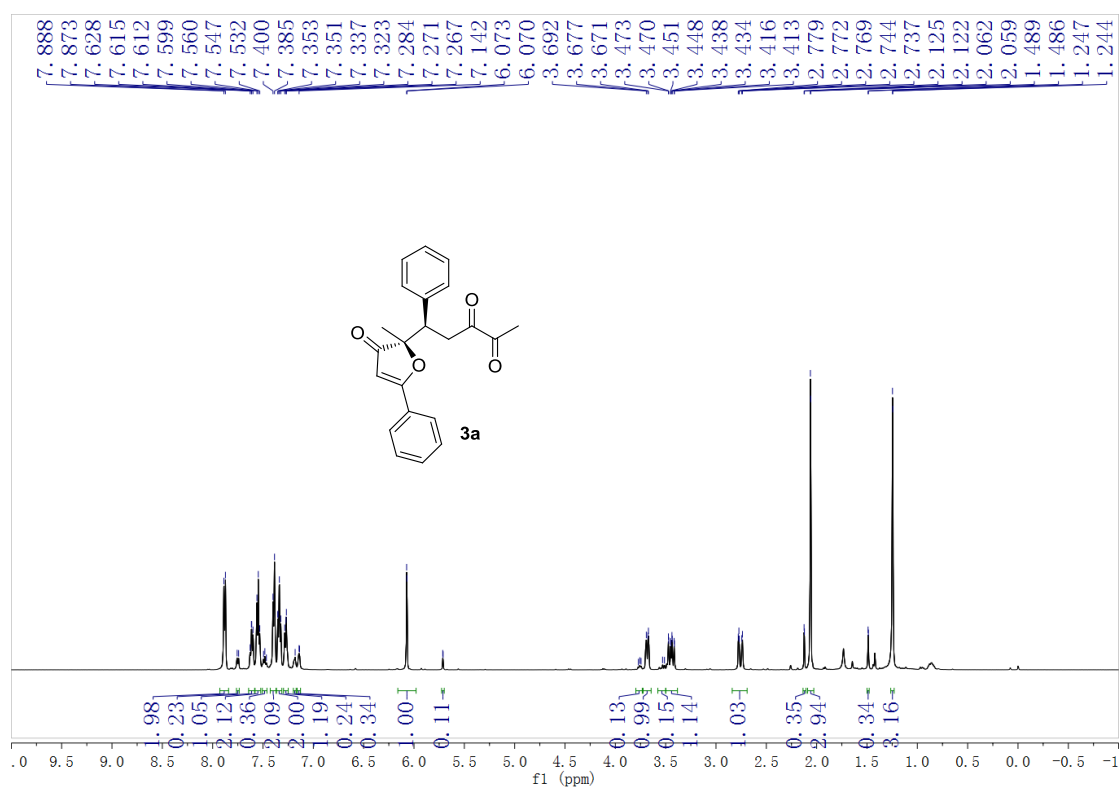

### $^{13}\text{C}$ NMR (125 MHz, $\text{CDCl}_3$ )

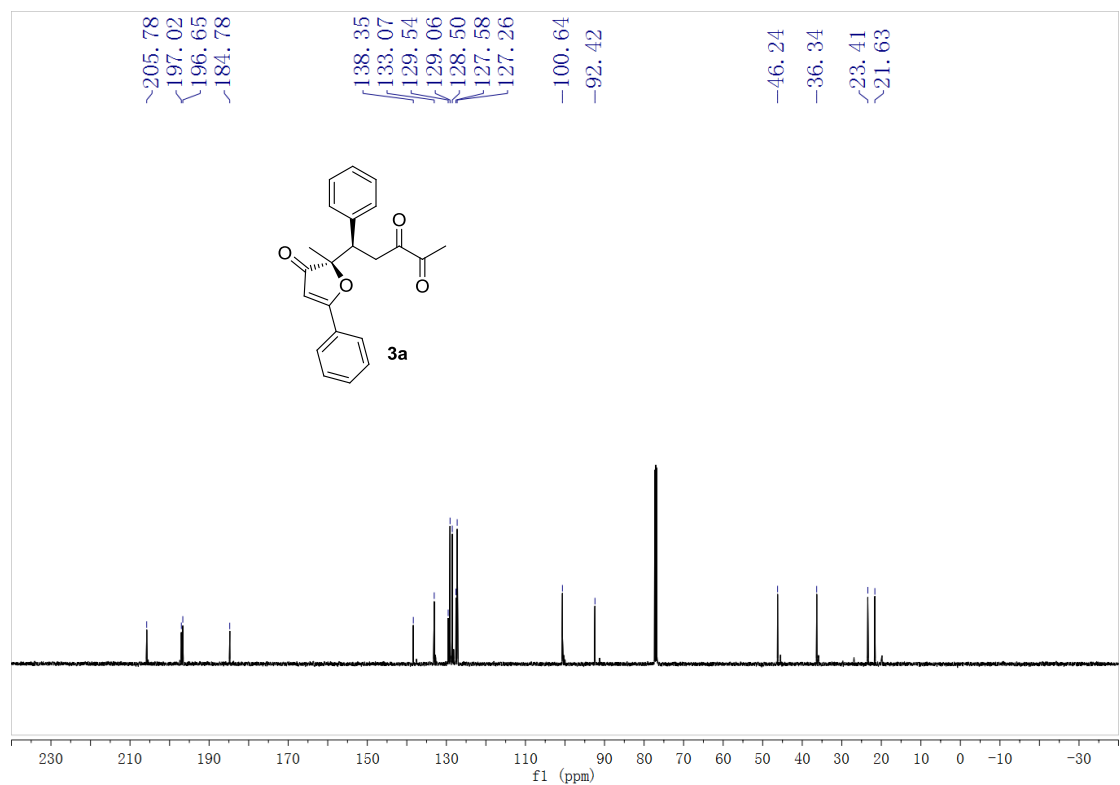

**<sup>1</sup>H NMR (500 MHz, CDCl<sub>3</sub>)**

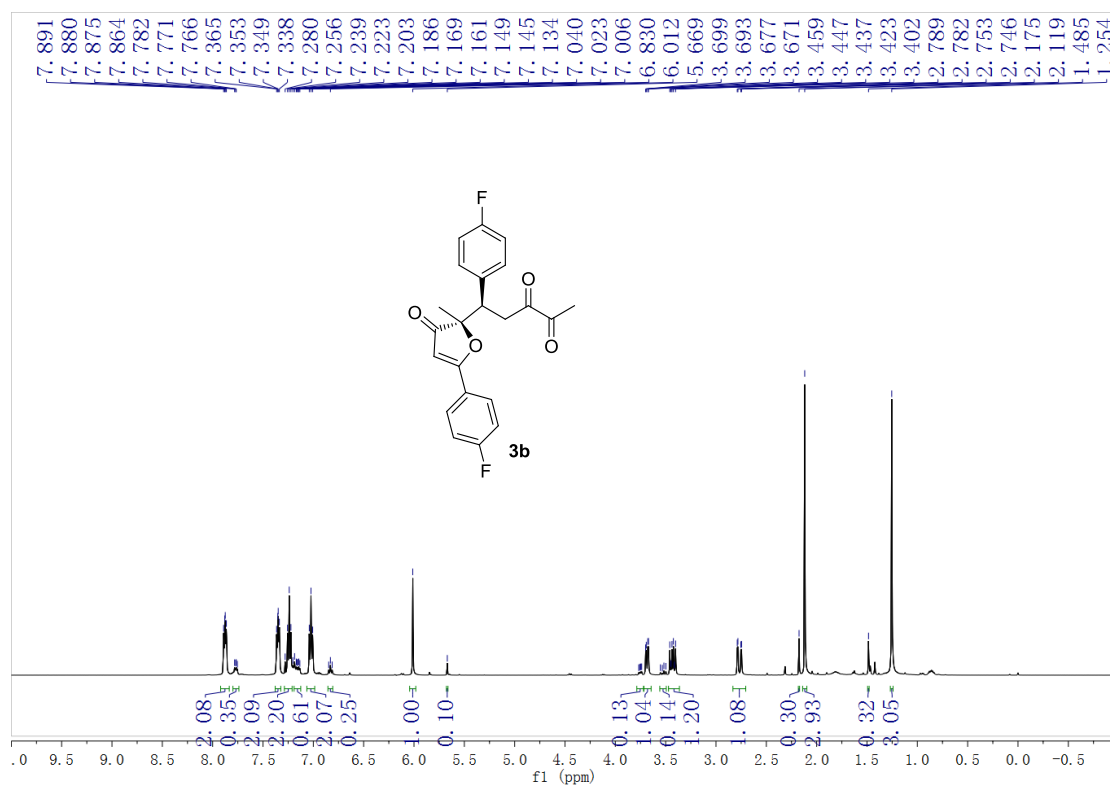

**<sup>13</sup>C NMR (125 MHz, CDCl<sub>3</sub>)**

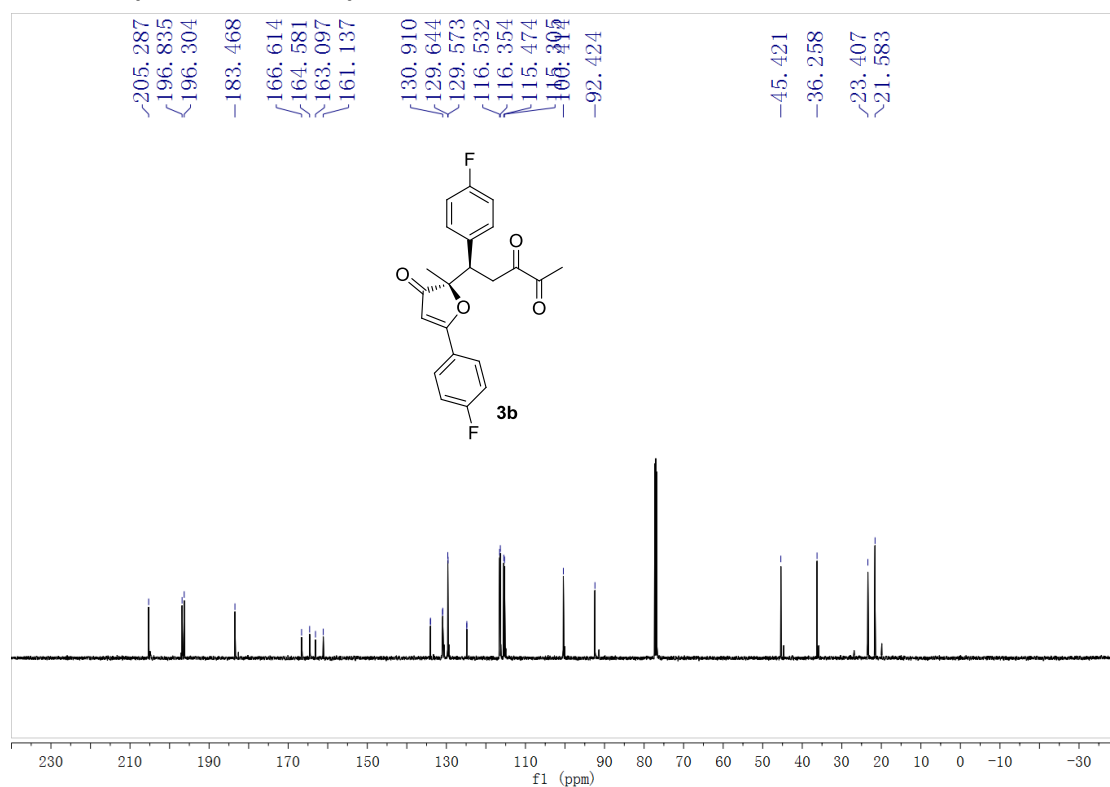

**<sup>1</sup>H NMR (500 MHz, CDCl<sub>3</sub>)**

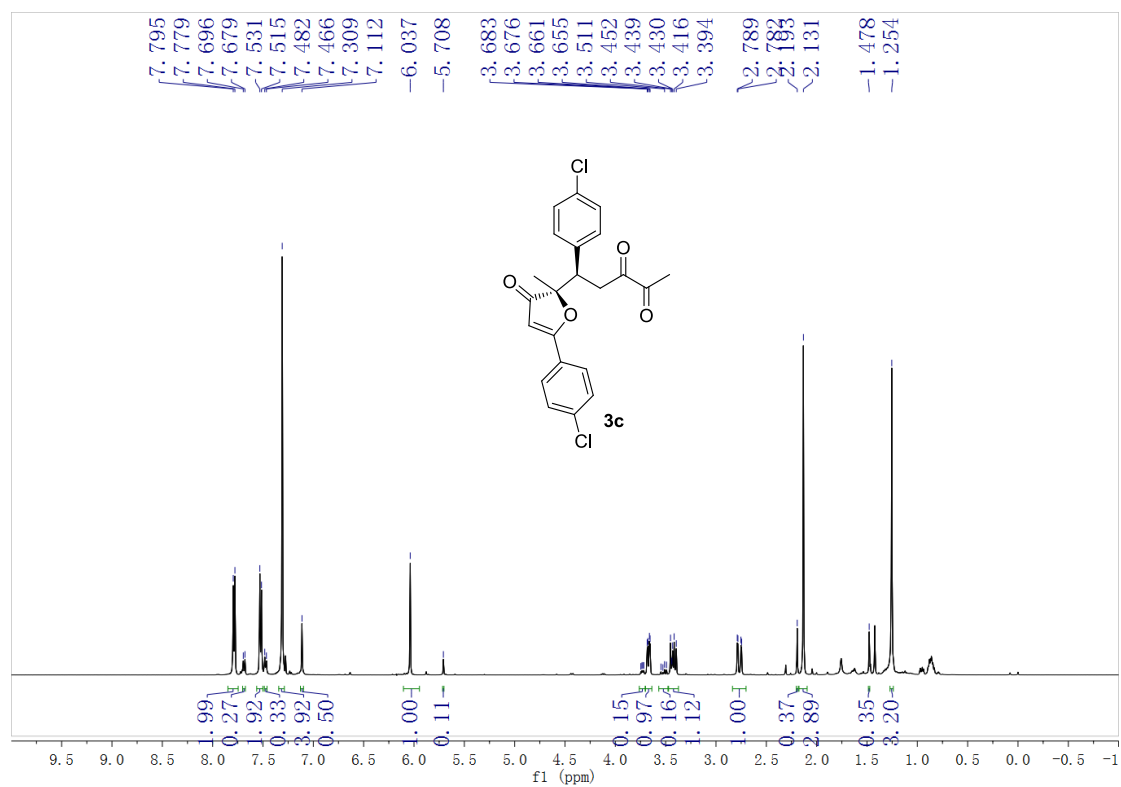

**<sup>13</sup>C NMR (125 MHz, CDCl<sub>3</sub>)**

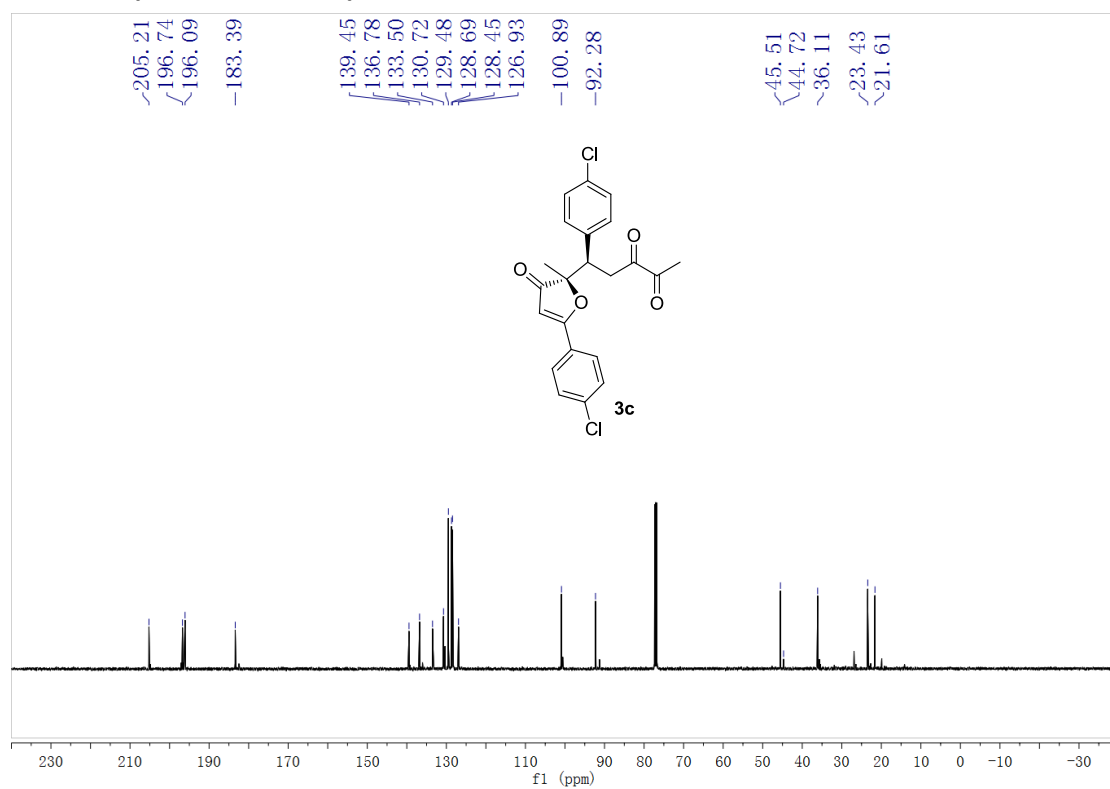

**<sup>1</sup>H NMR (500 MHz, CDCl<sub>3</sub>)**

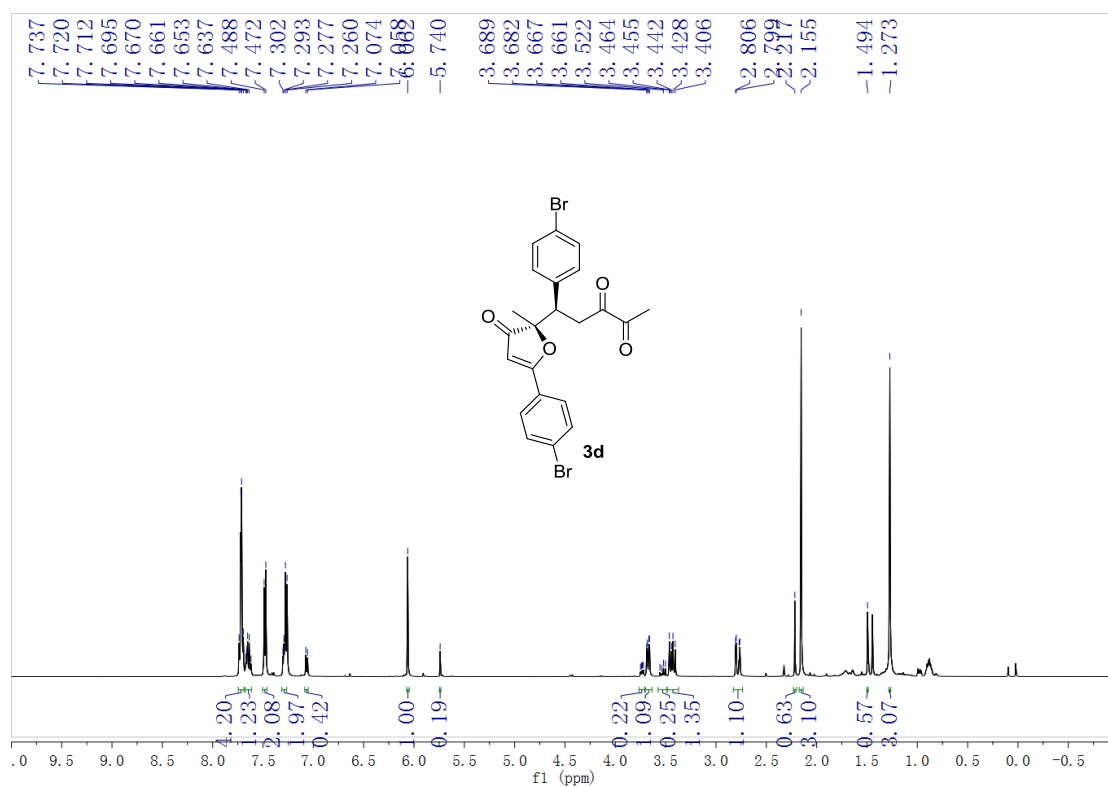

**<sup>13</sup>C NMR (125 MHz, CDCl<sub>3</sub>)**

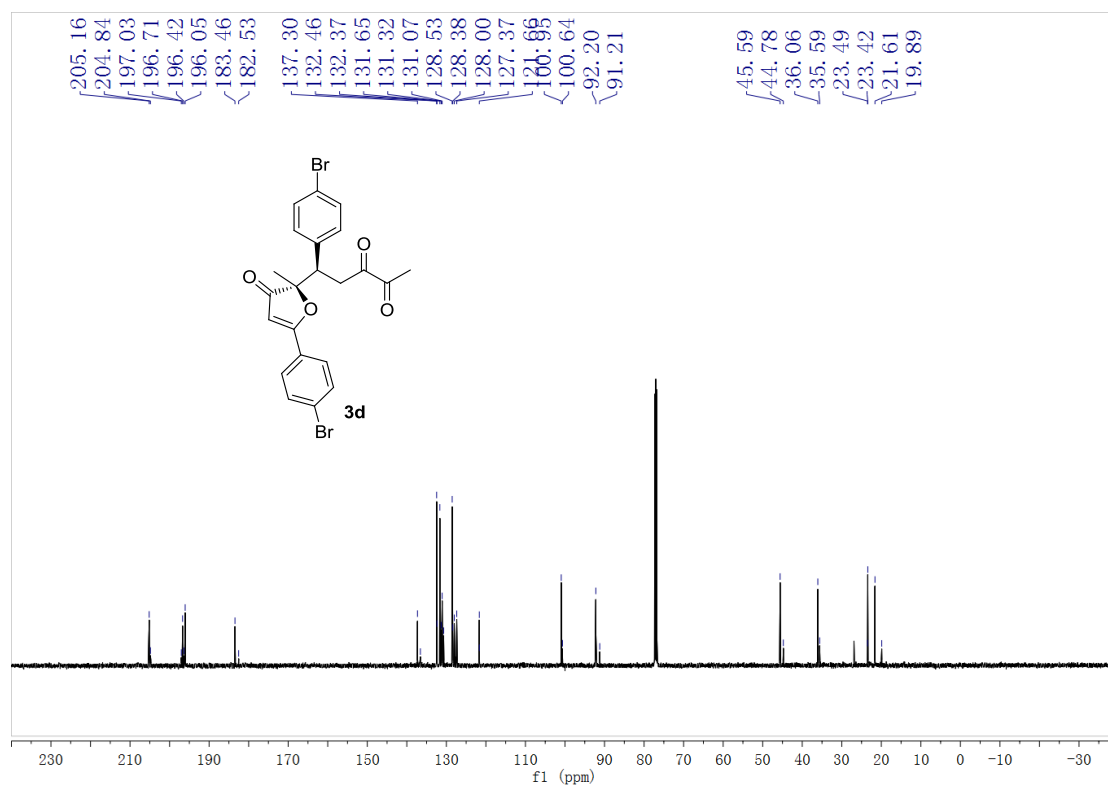

**<sup>1</sup>H NMR (500 MHz, CDCl<sub>3</sub>)**

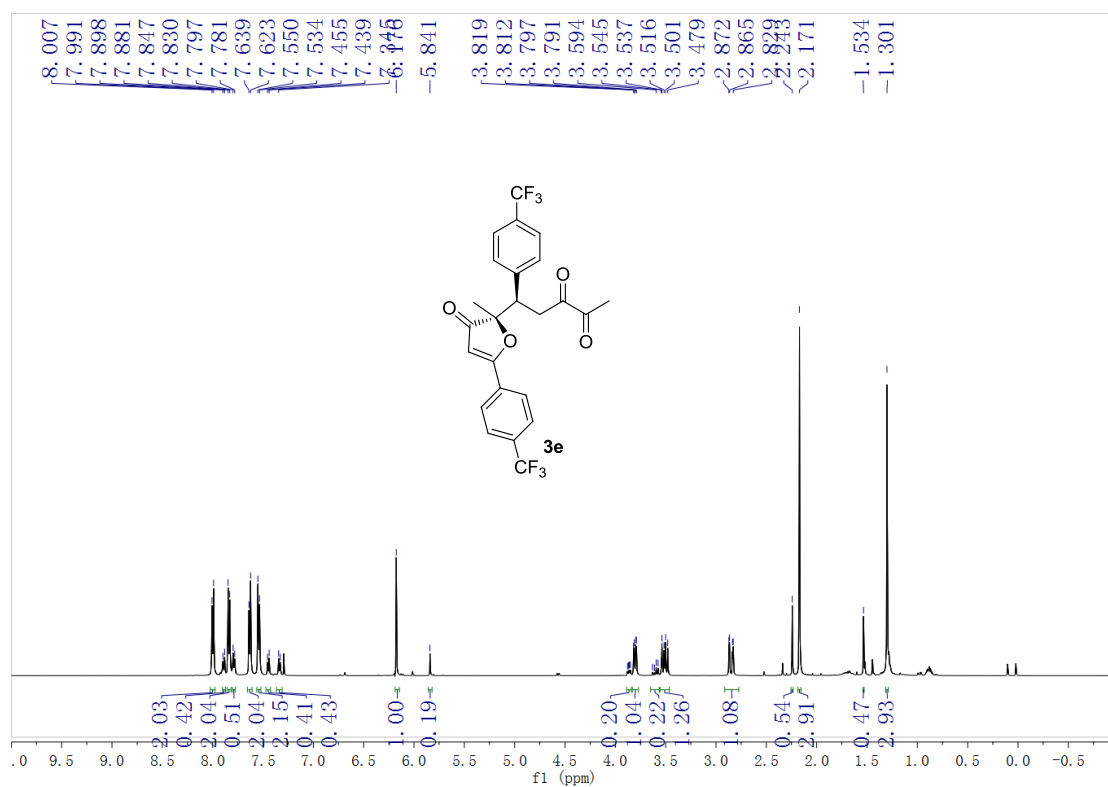

**<sup>13</sup>C NMR (125 MHz, CDCl<sub>3</sub>)**

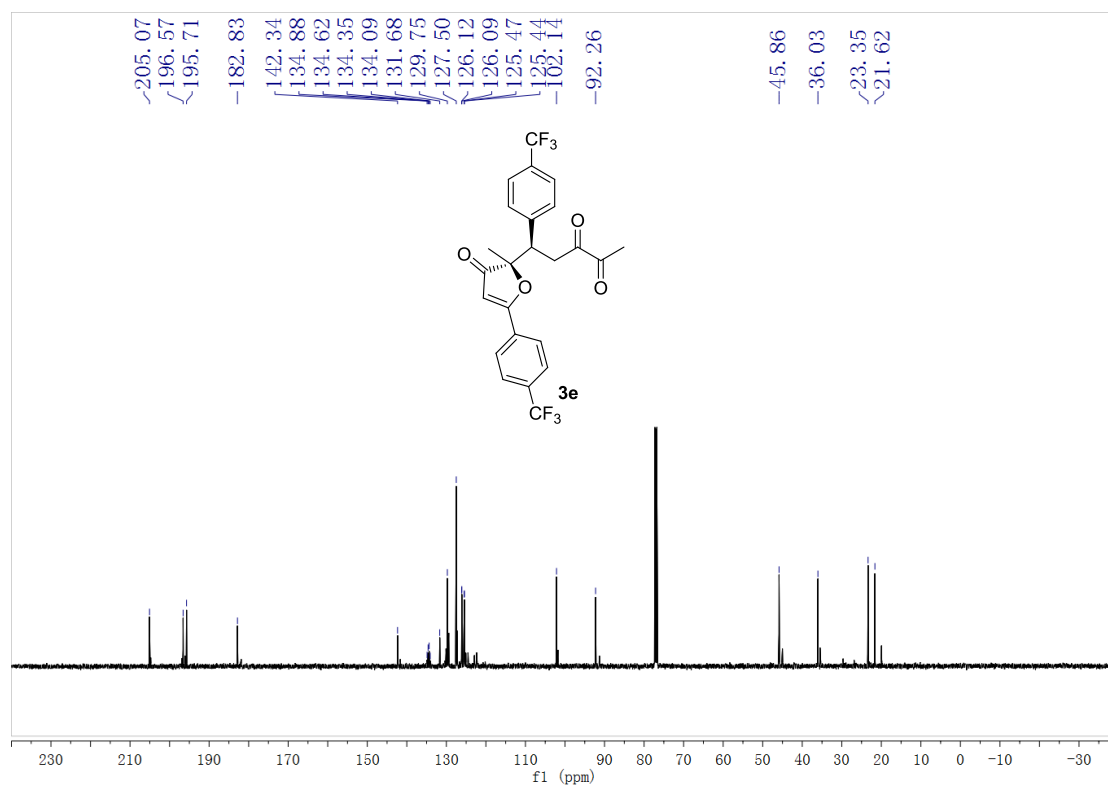

**<sup>1</sup>H NMR (500 MHz, CDCl<sub>3</sub>)**

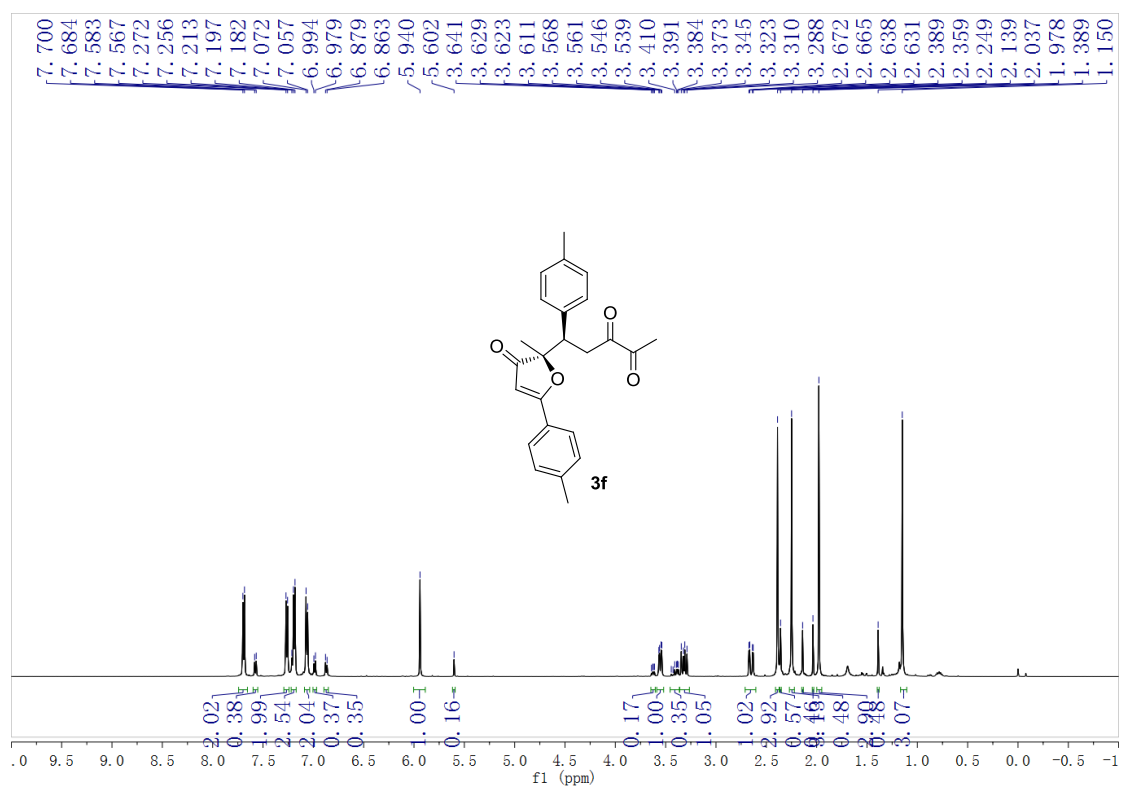

**<sup>13</sup>C NMR (125 MHz, CDCl<sub>3</sub>)**

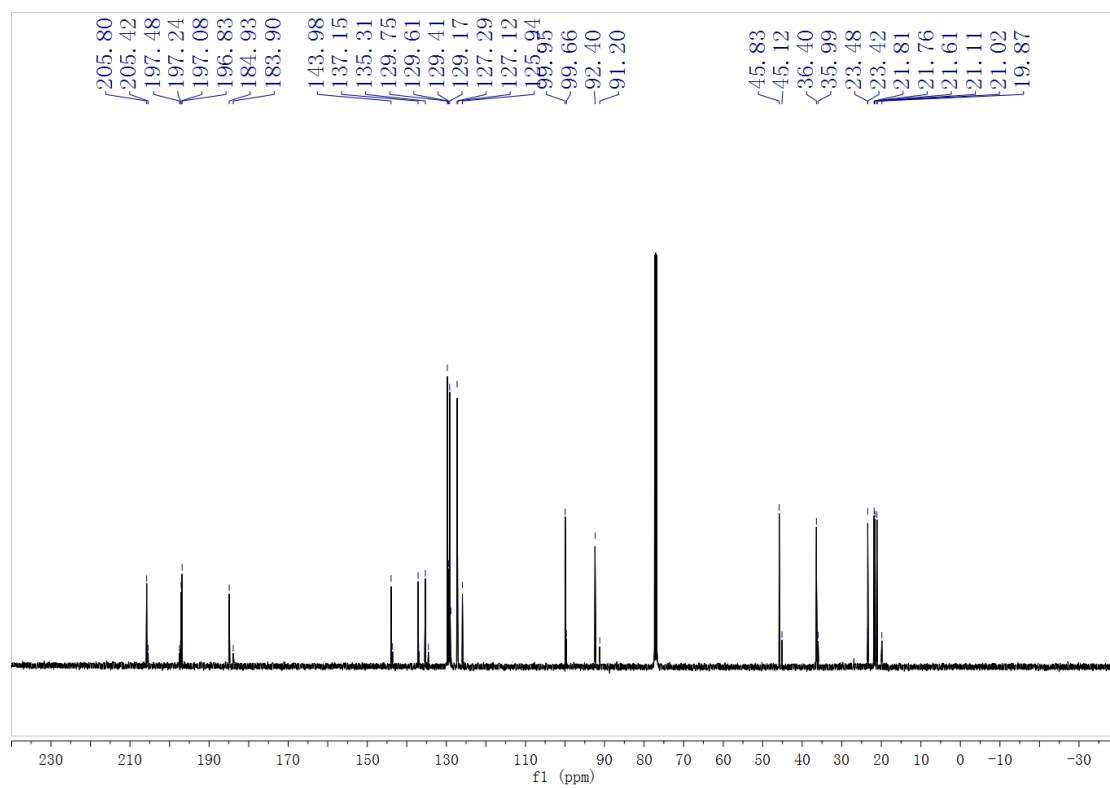

### <sup>1</sup>H NMR (500 MHz, CDCl<sub>3</sub>)

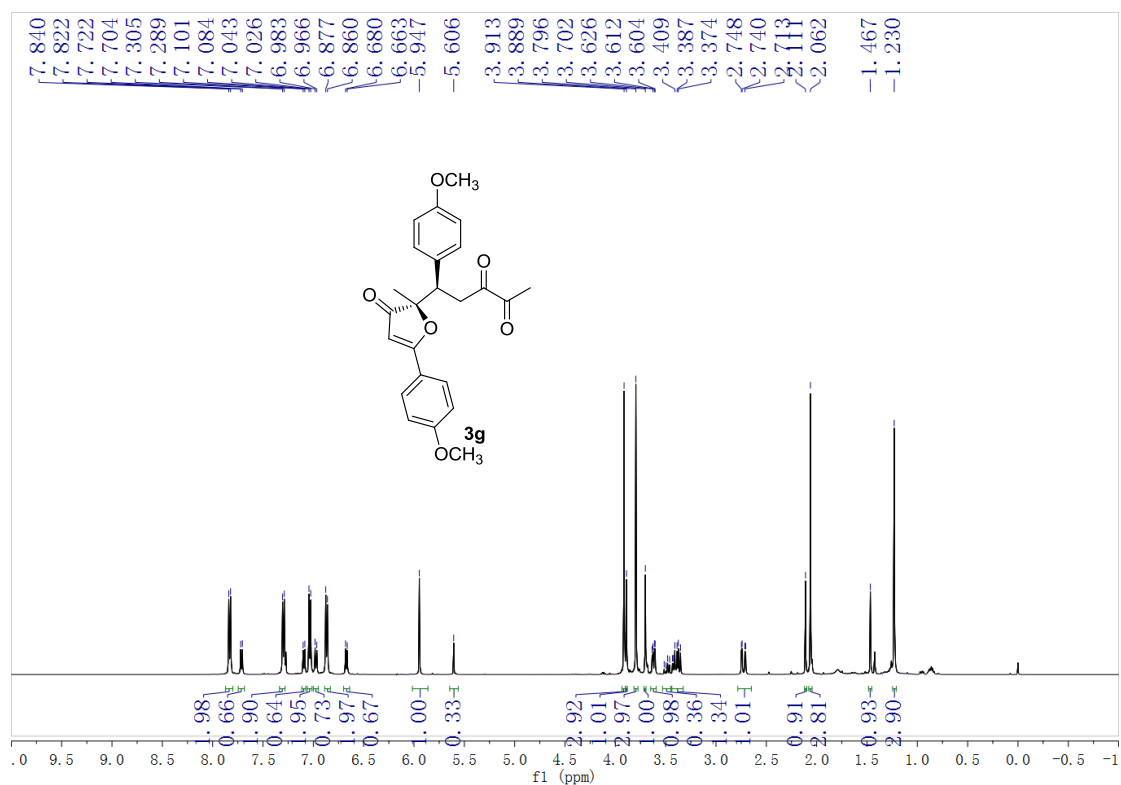

### <sup>13</sup>C NMR (125 MHz, CDCl<sub>3</sub>)

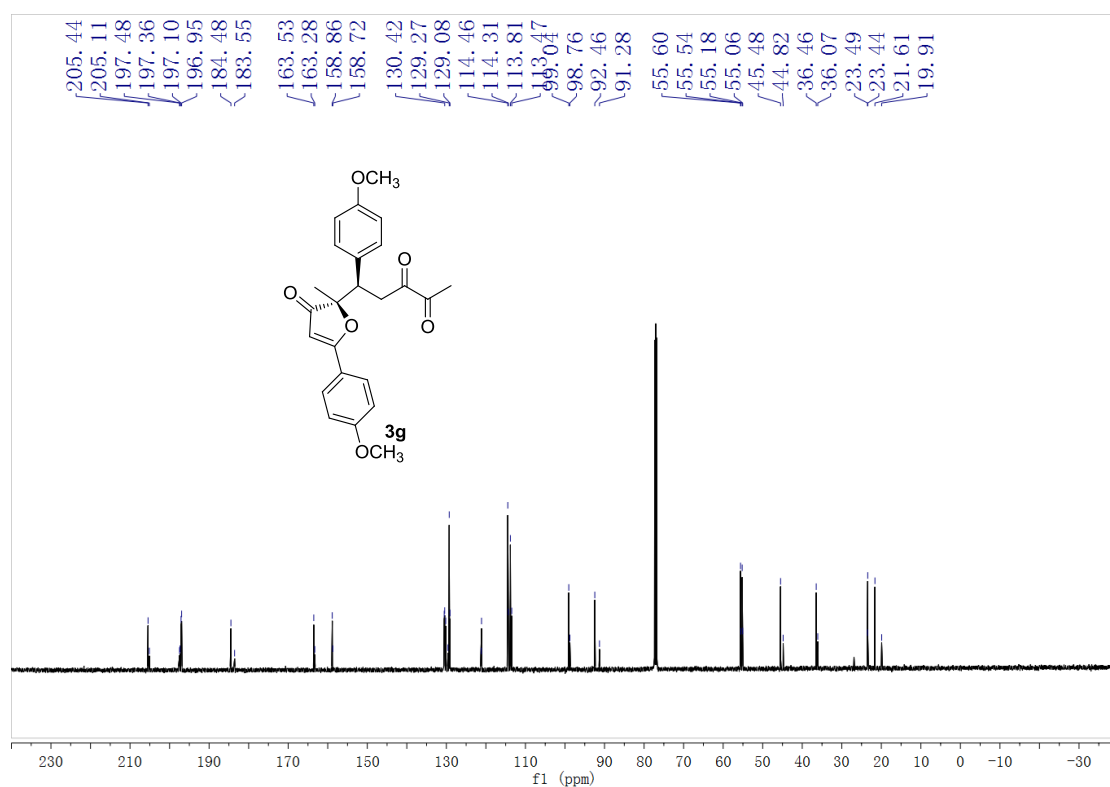

**<sup>1</sup>H NMR (500 MHz, CDCl<sub>3</sub>)**

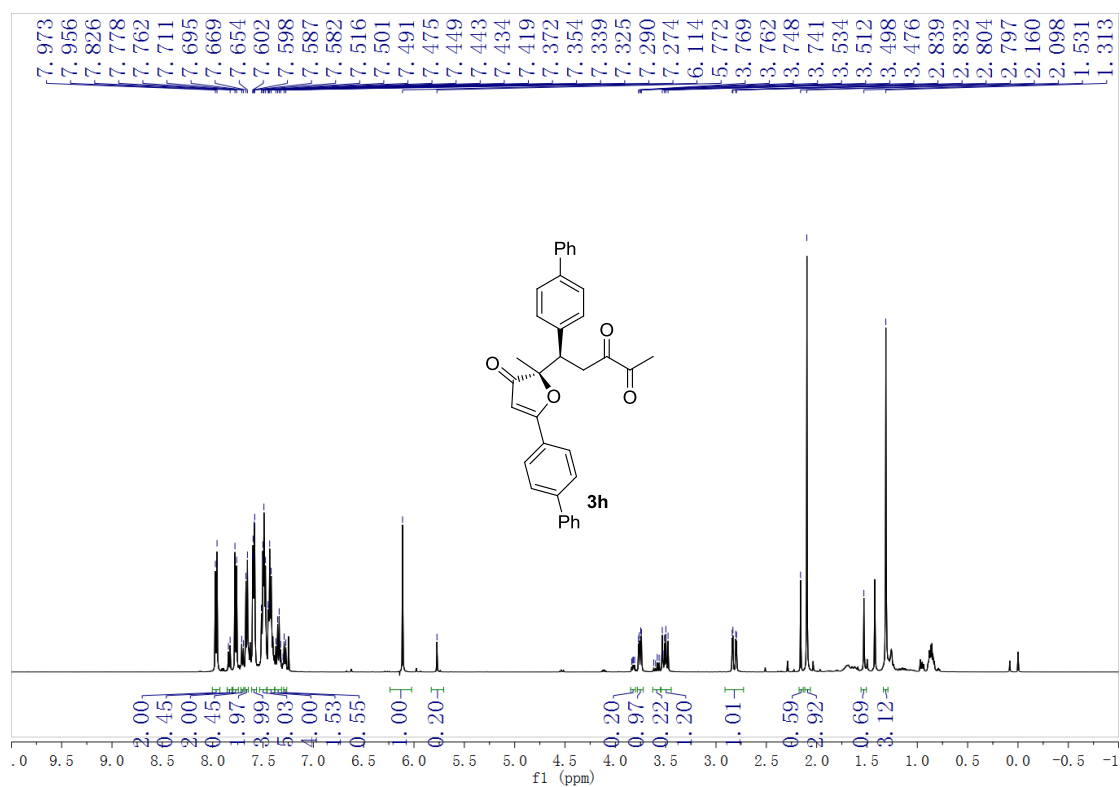

**<sup>13</sup>C NMR (125 MHz, CDCl<sub>3</sub>)**

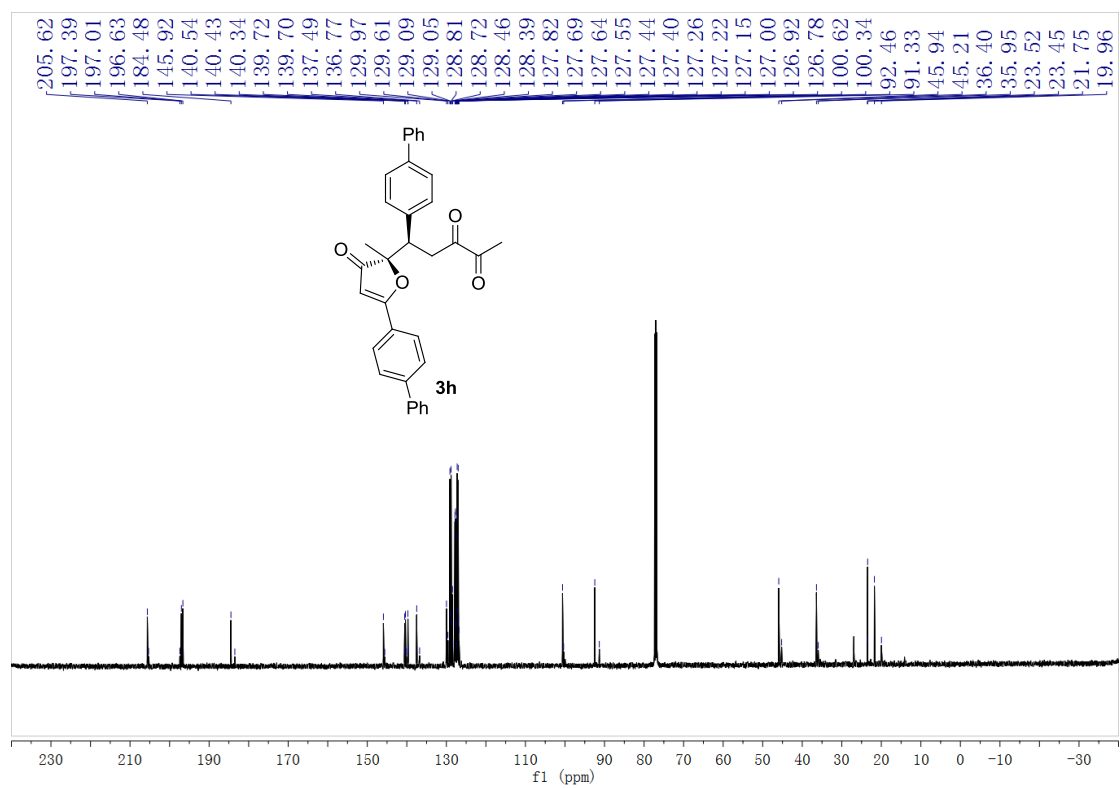



**<sup>1</sup>H NMR (500 MHz, CDCl<sub>3</sub>)**

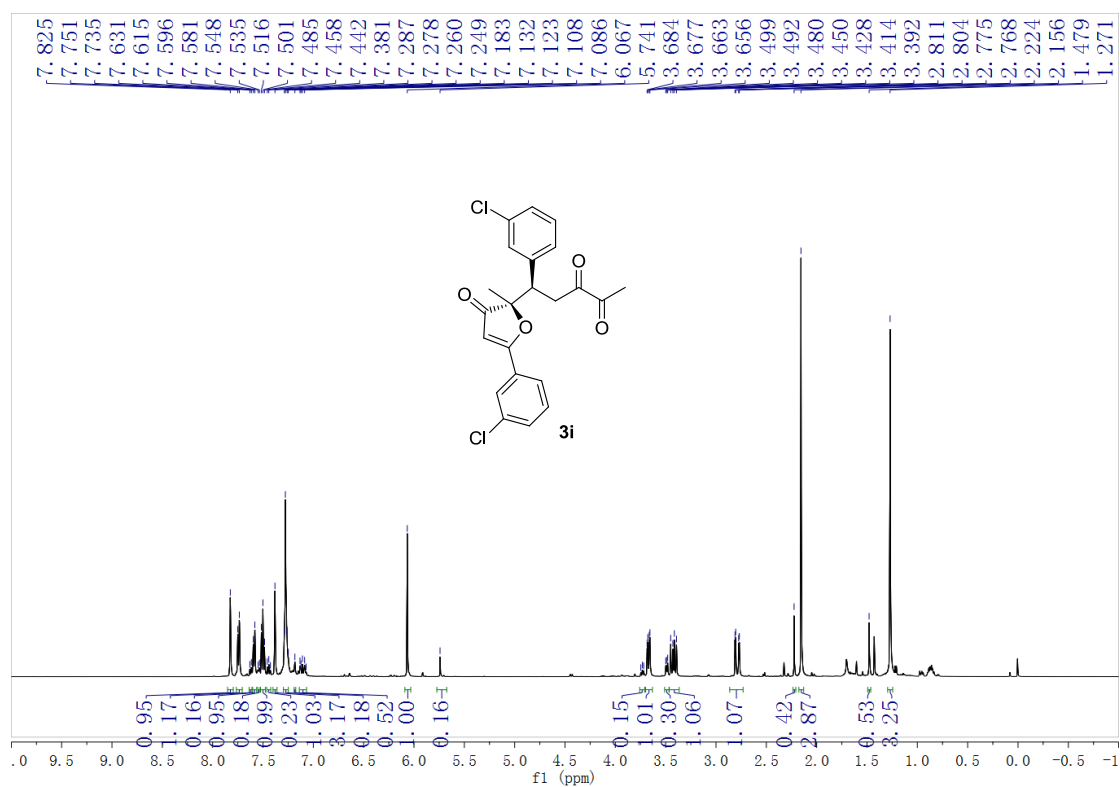

**<sup>13</sup>C NMR (125 MHz, CDCl<sub>3</sub>)**

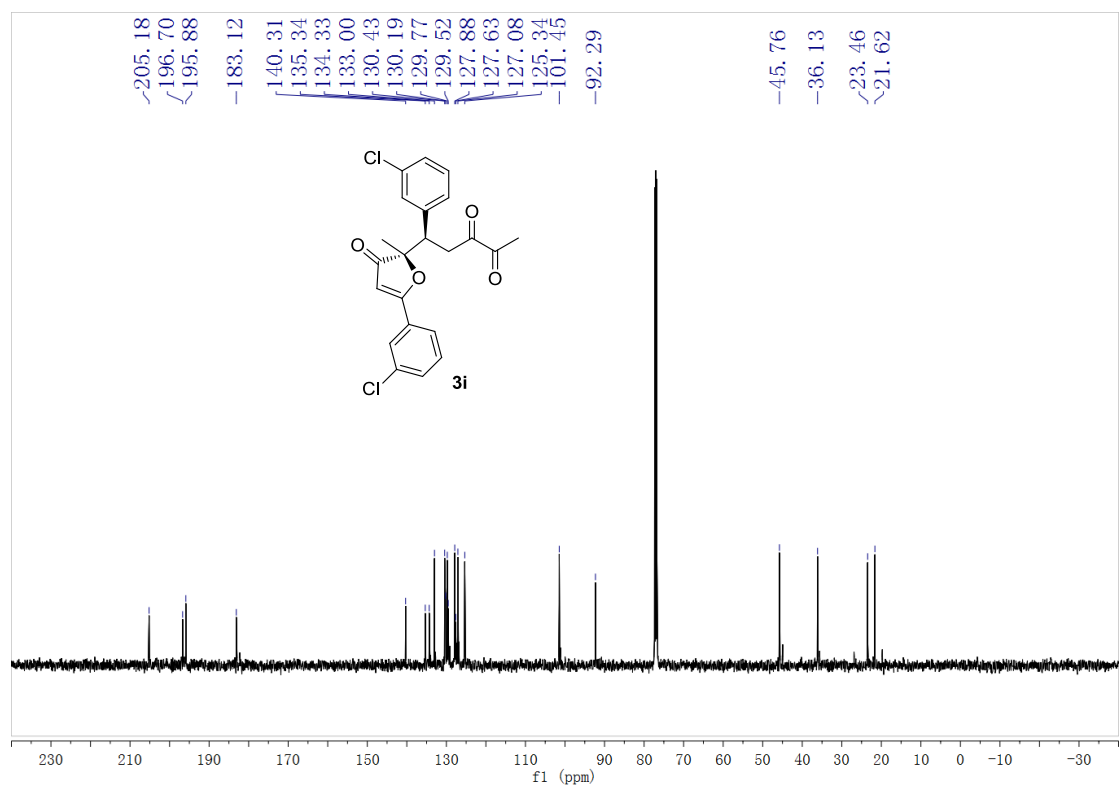

**<sup>1</sup>H NMR (500 MHz, CDCl<sub>3</sub>)**

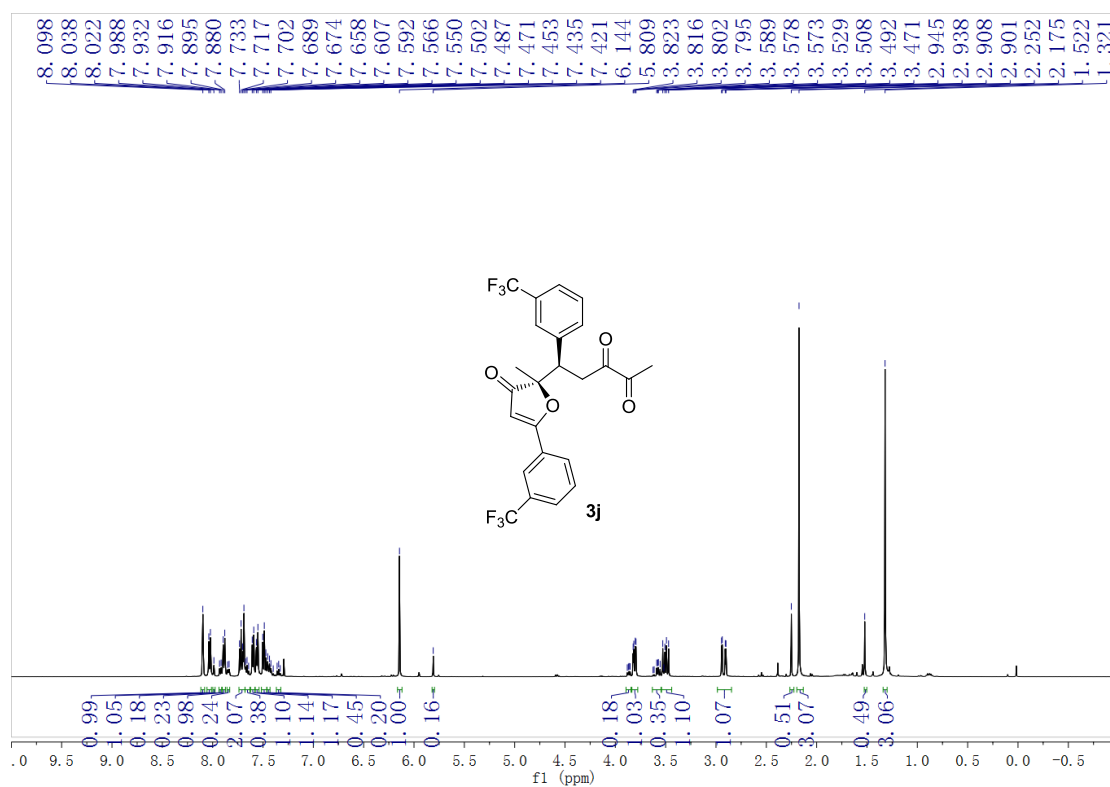

**<sup>13</sup>C NMR (125 MHz, CDCl<sub>3</sub>)**

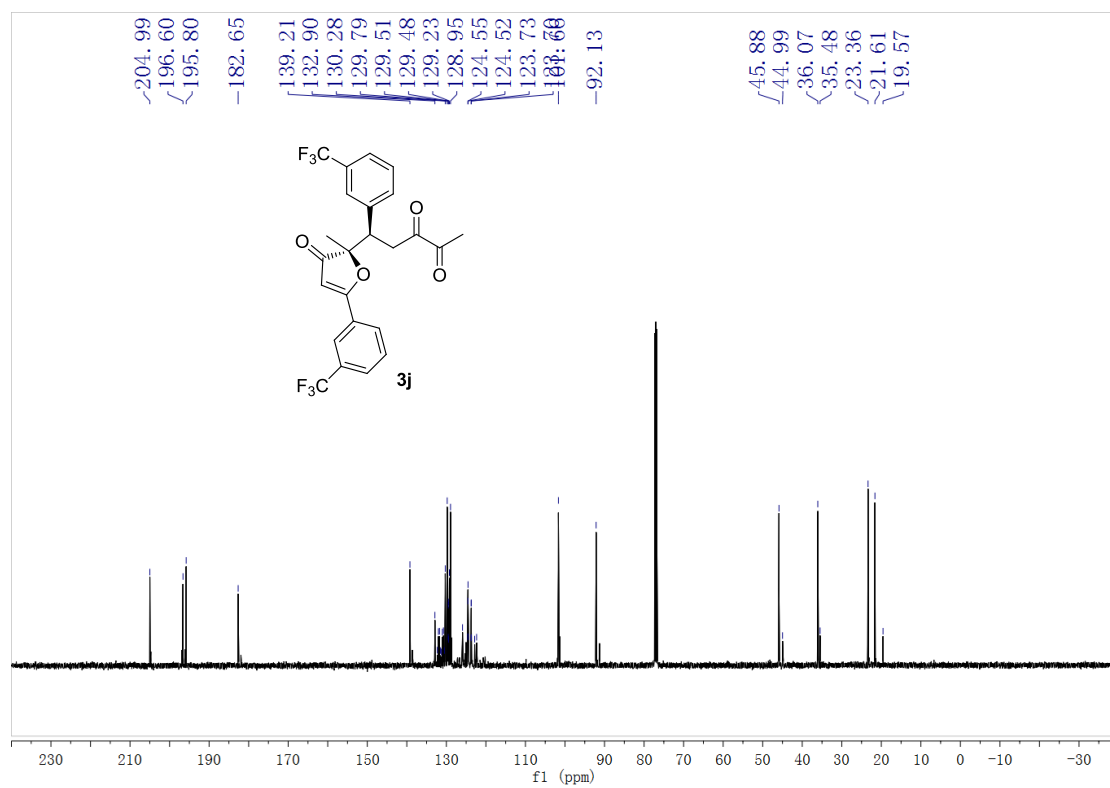

**<sup>1</sup>H NMR (500 MHz, CDCl<sub>3</sub>)**

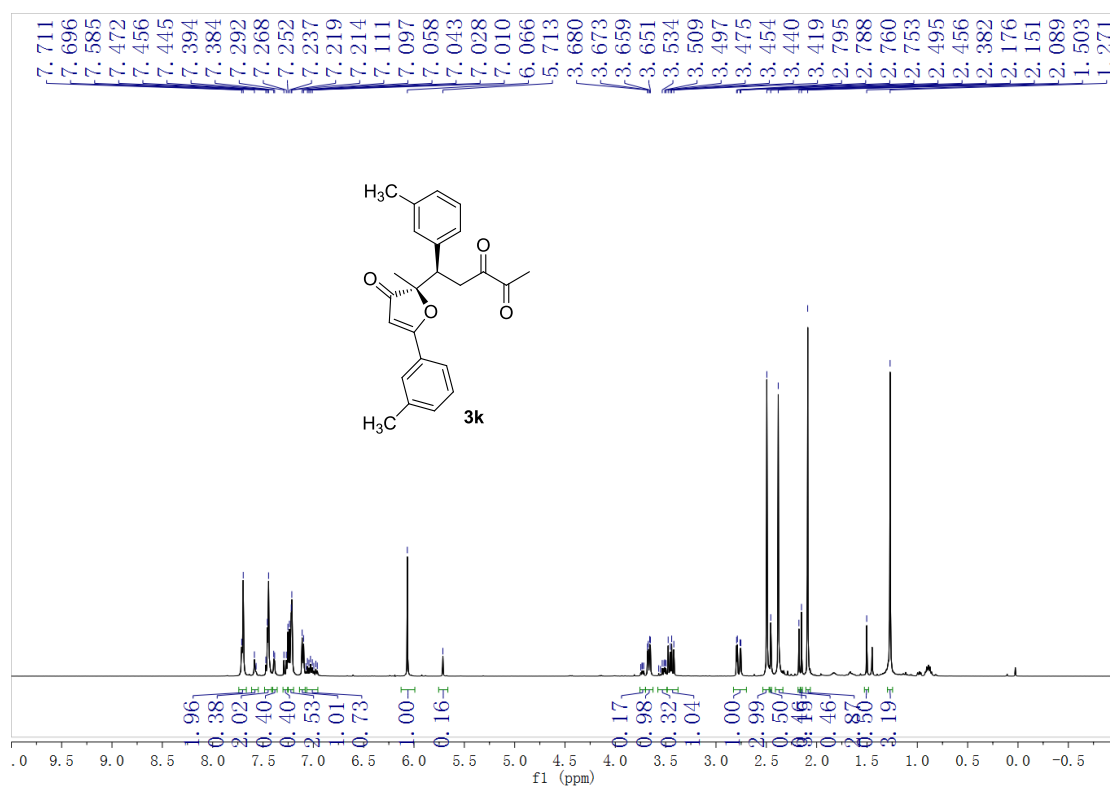

**<sup>13</sup>C NMR (125 MHz, CDCl<sub>3</sub>)**

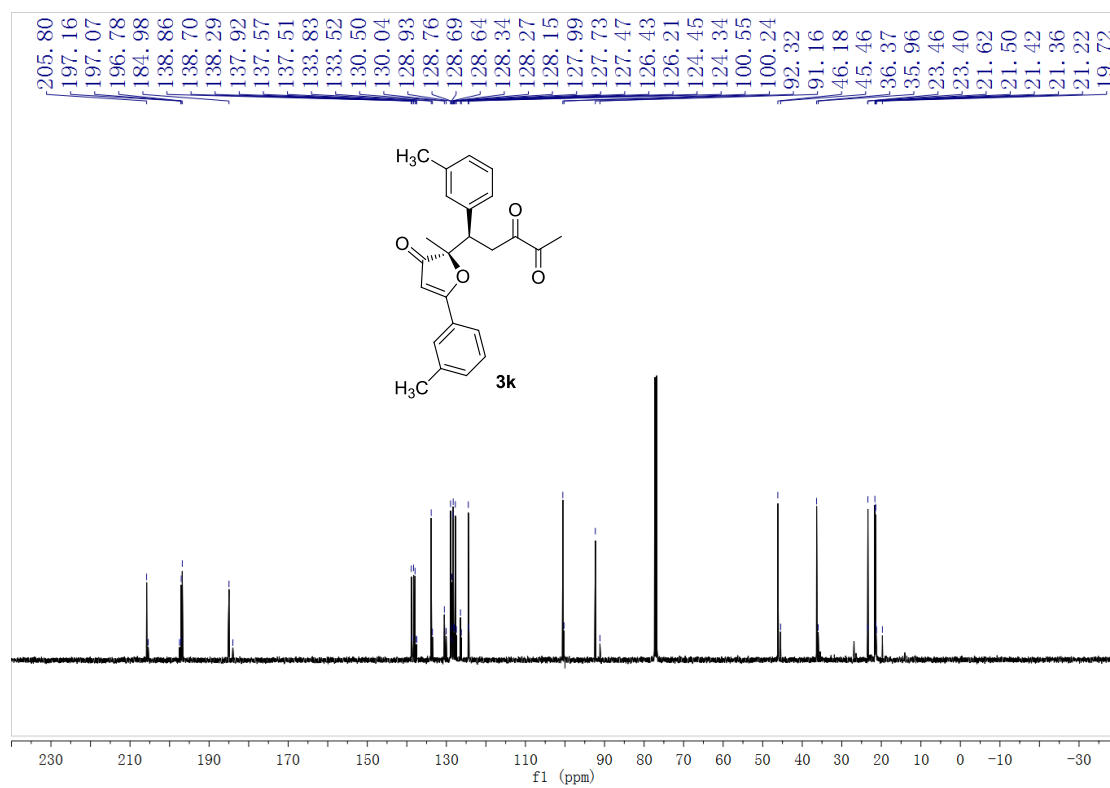

**<sup>1</sup>H NMR (500 MHz, CDCl<sub>3</sub>)**

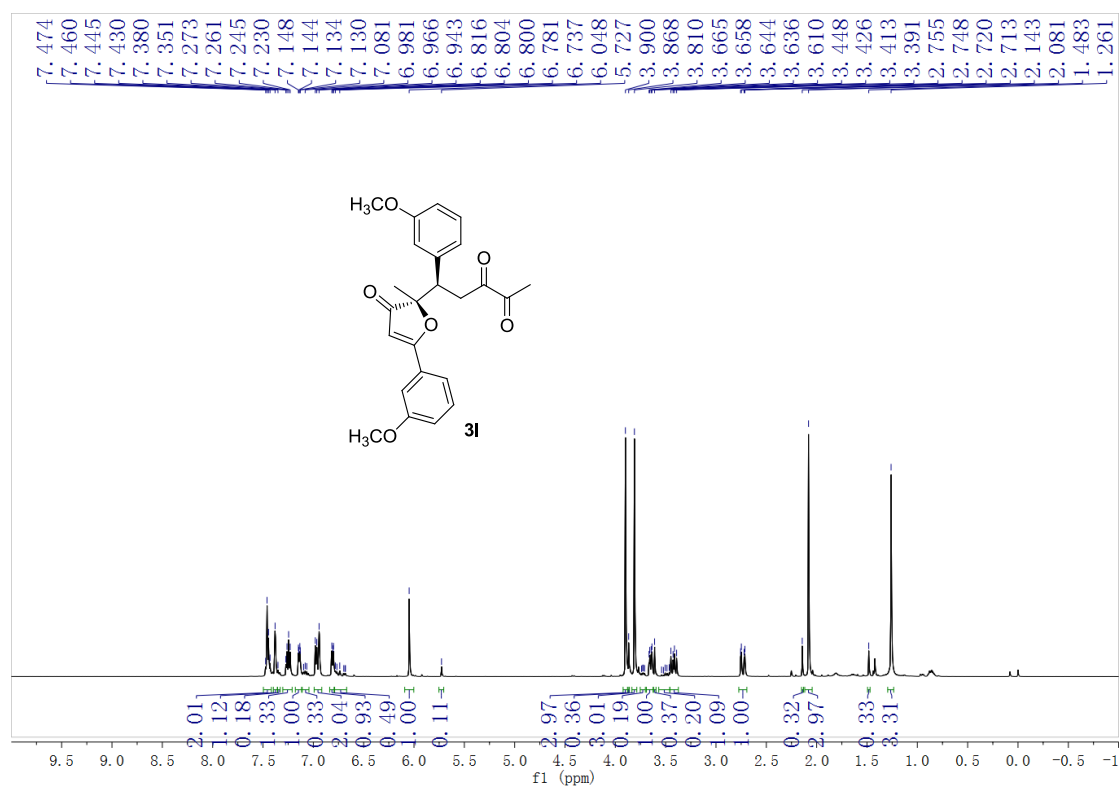

**<sup>13</sup>C NMR (125 MHz, CDCl<sub>3</sub>)**

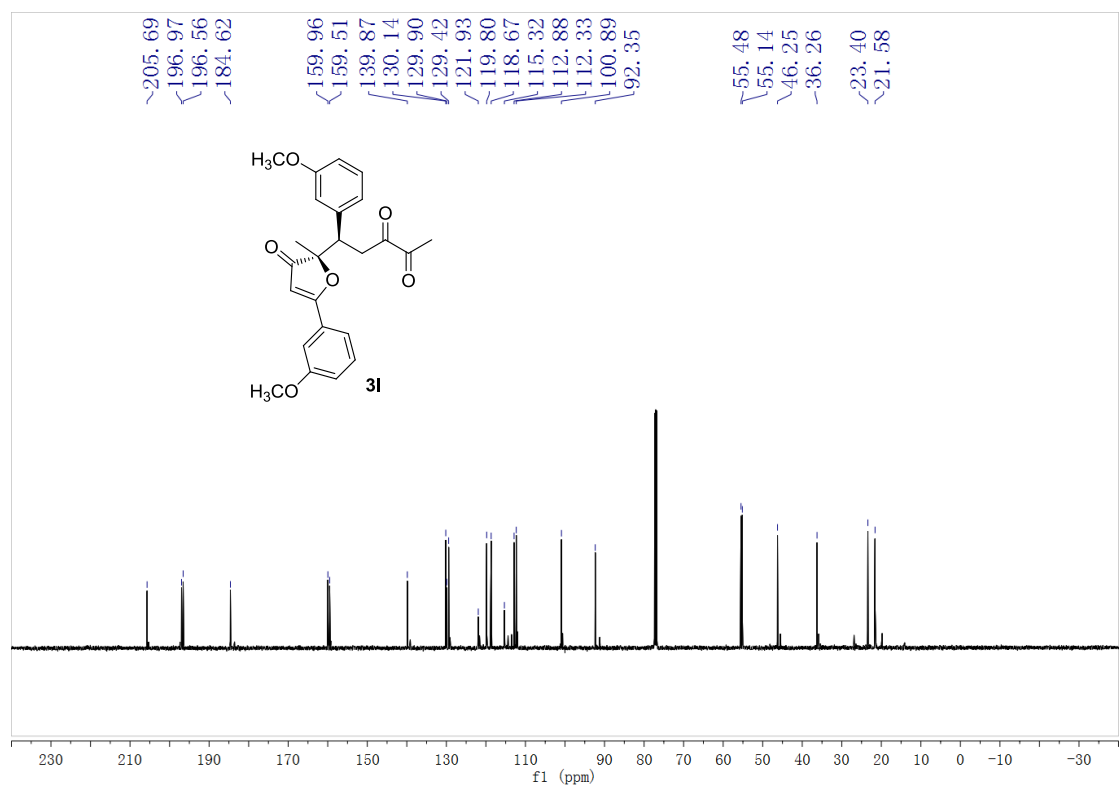

**<sup>1</sup>H NMR (500 MHz, CDCl<sub>3</sub>)**

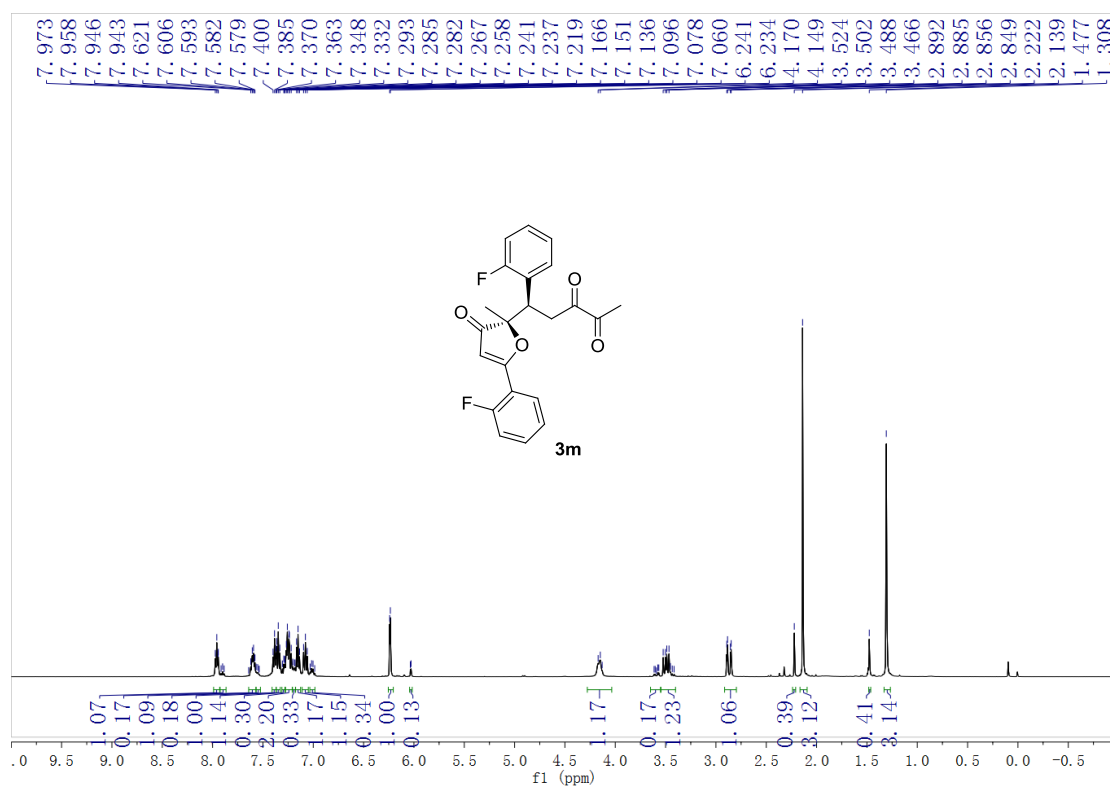

**<sup>13</sup>C NMR (125 MHz, CDCl<sub>3</sub>)**

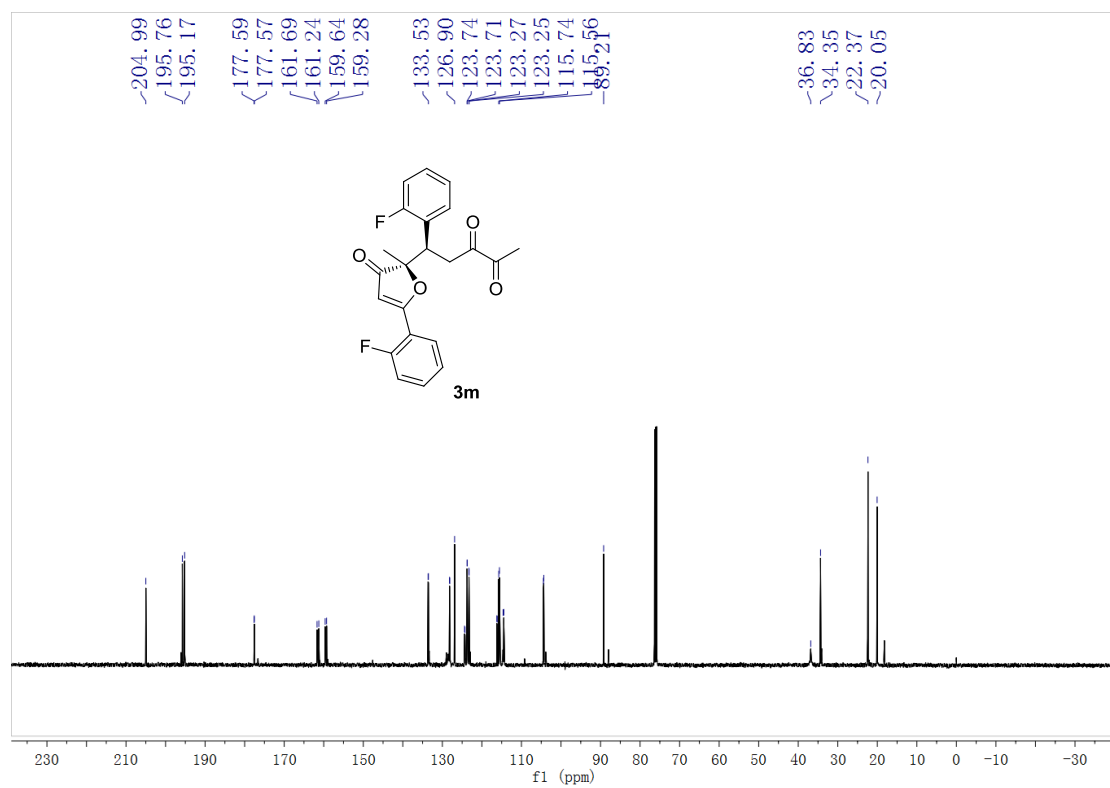

**<sup>1</sup>H NMR (500 MHz, CDCl<sub>3</sub>)**

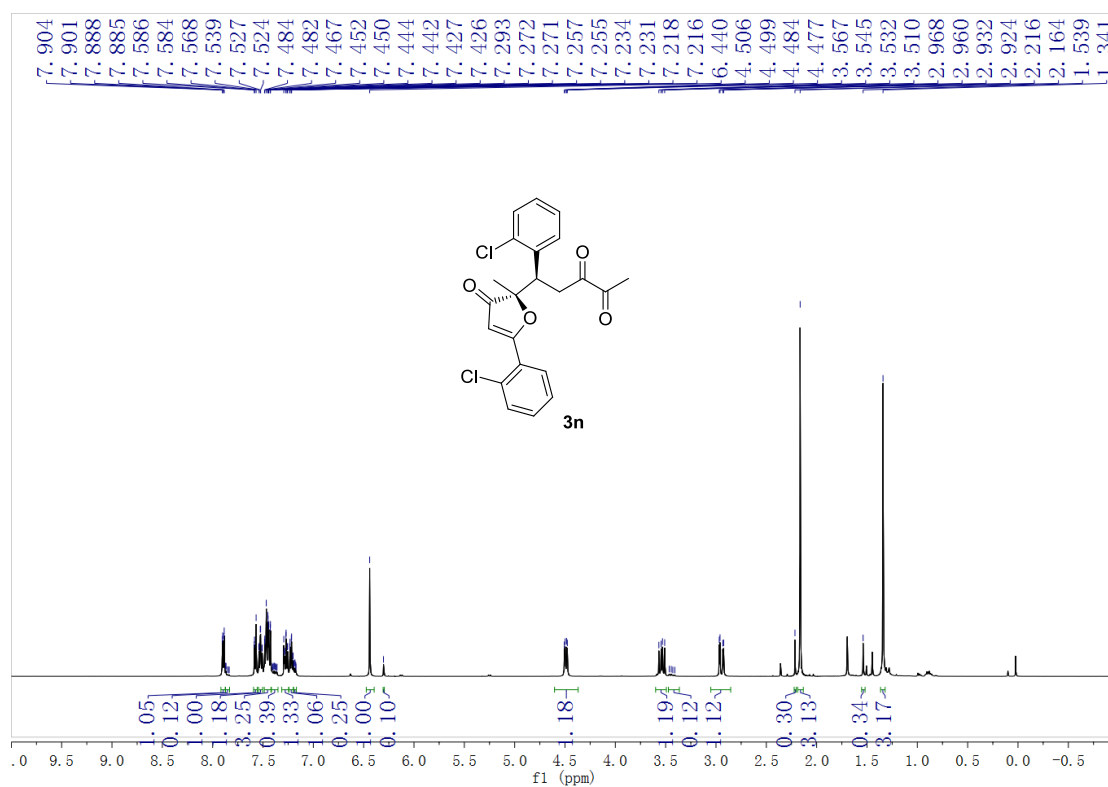

**<sup>13</sup>C NMR (125 MHz, CDCl<sub>3</sub>)**

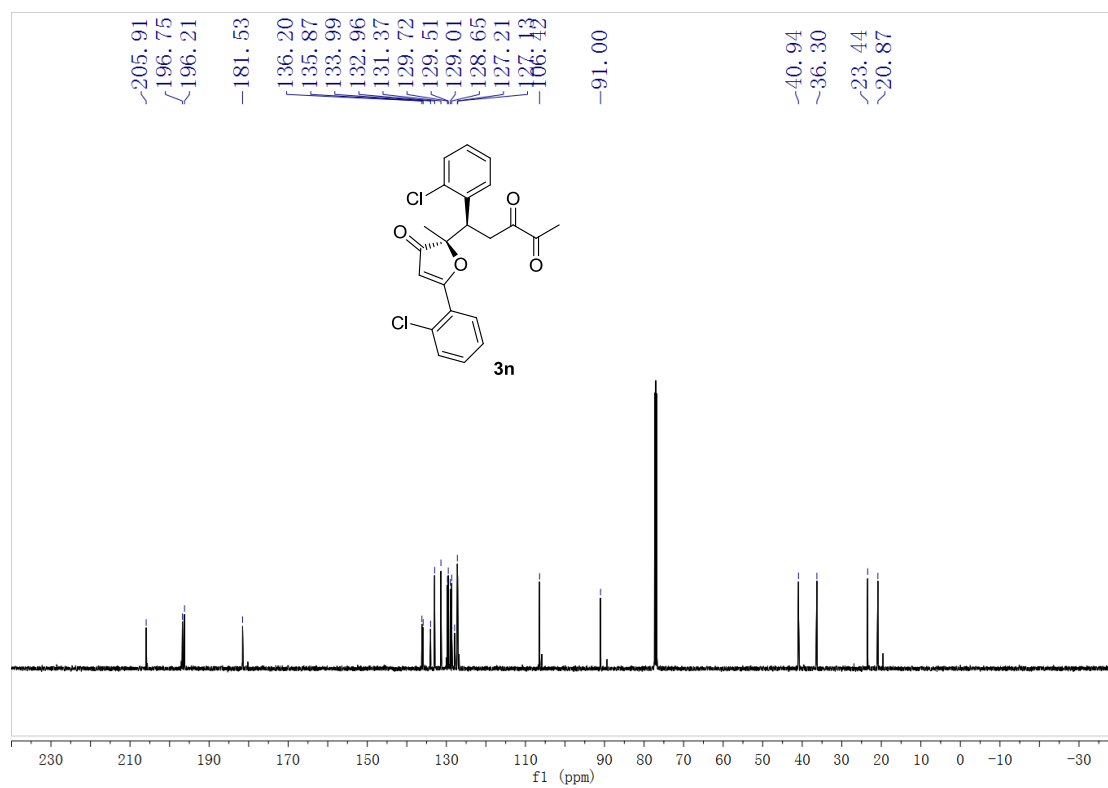

**<sup>1</sup>H NMR (500 MHz, CDCl<sub>3</sub>)**

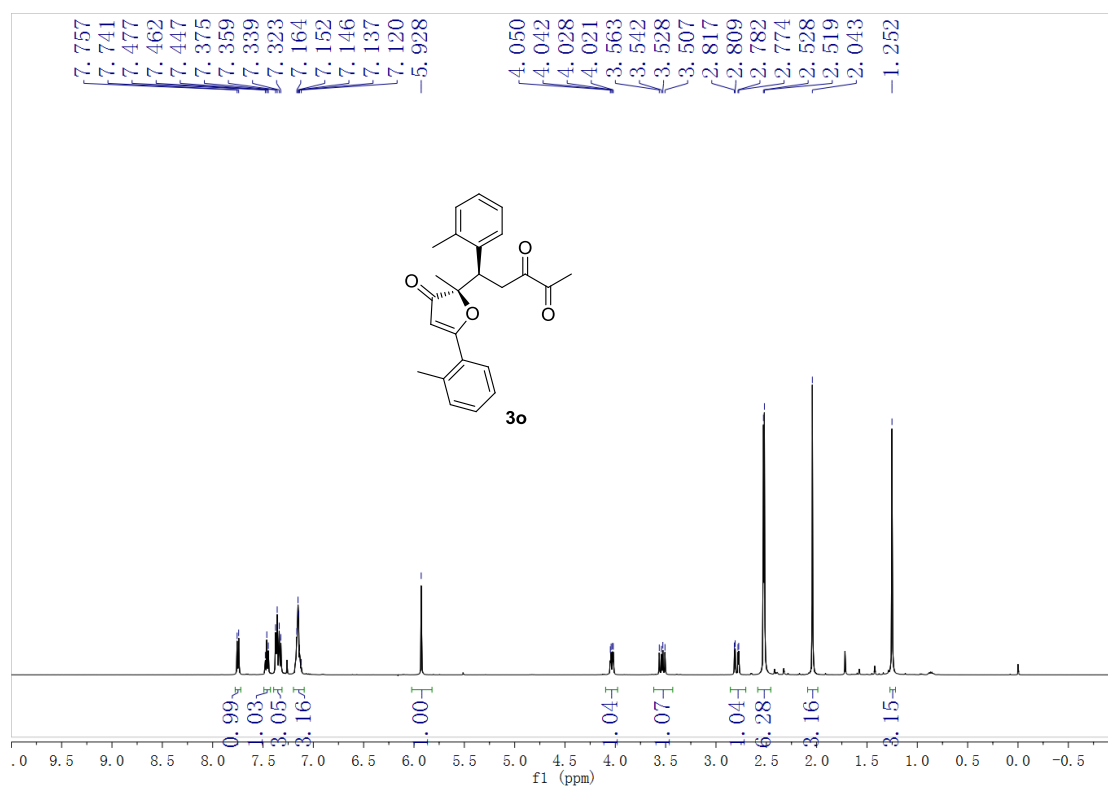

**<sup>13</sup>C NMR (125 MHz, CDCl<sub>3</sub>)**

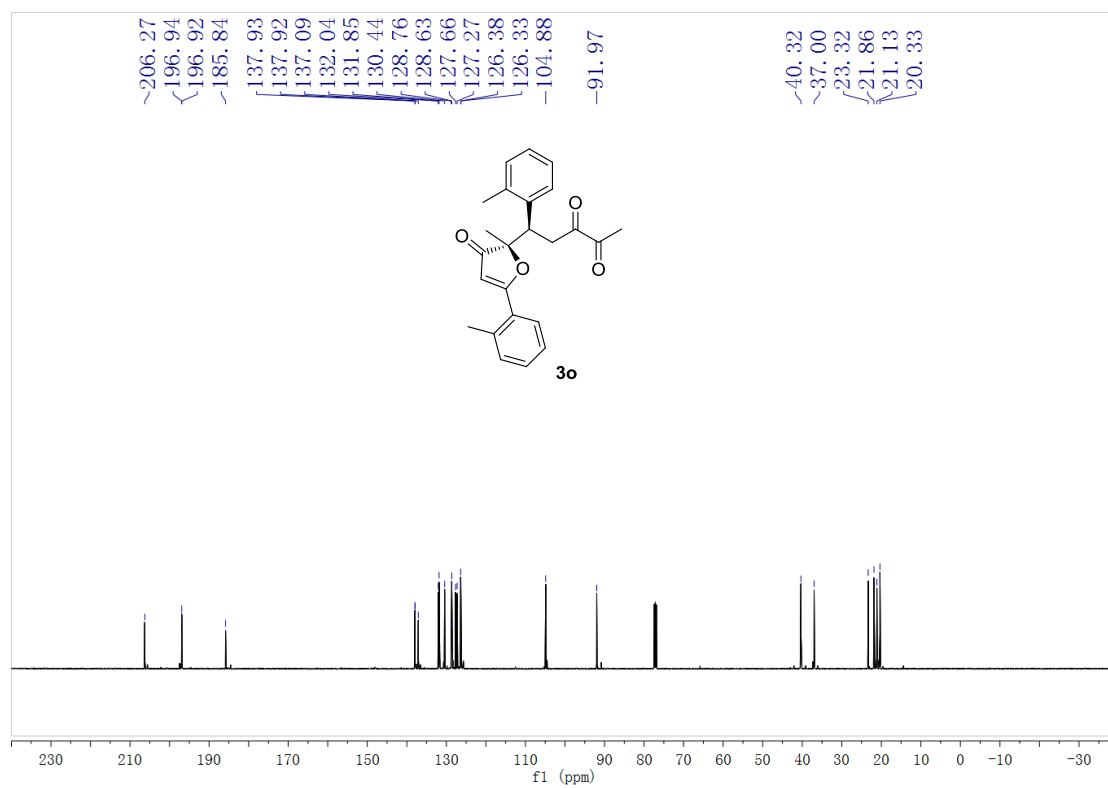

**<sup>1</sup>H NMR (500 MHz, CDCl<sub>3</sub>)**

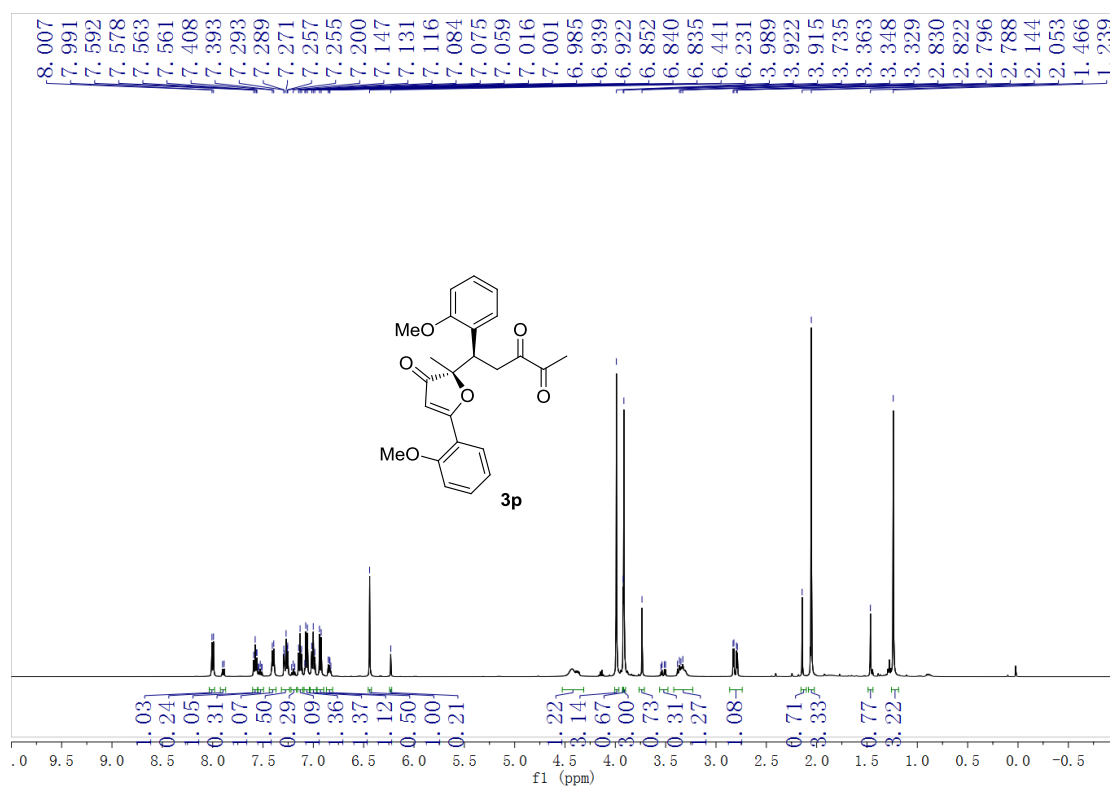

**<sup>13</sup>C NMR (125 MHz, CDCl<sub>3</sub>)**

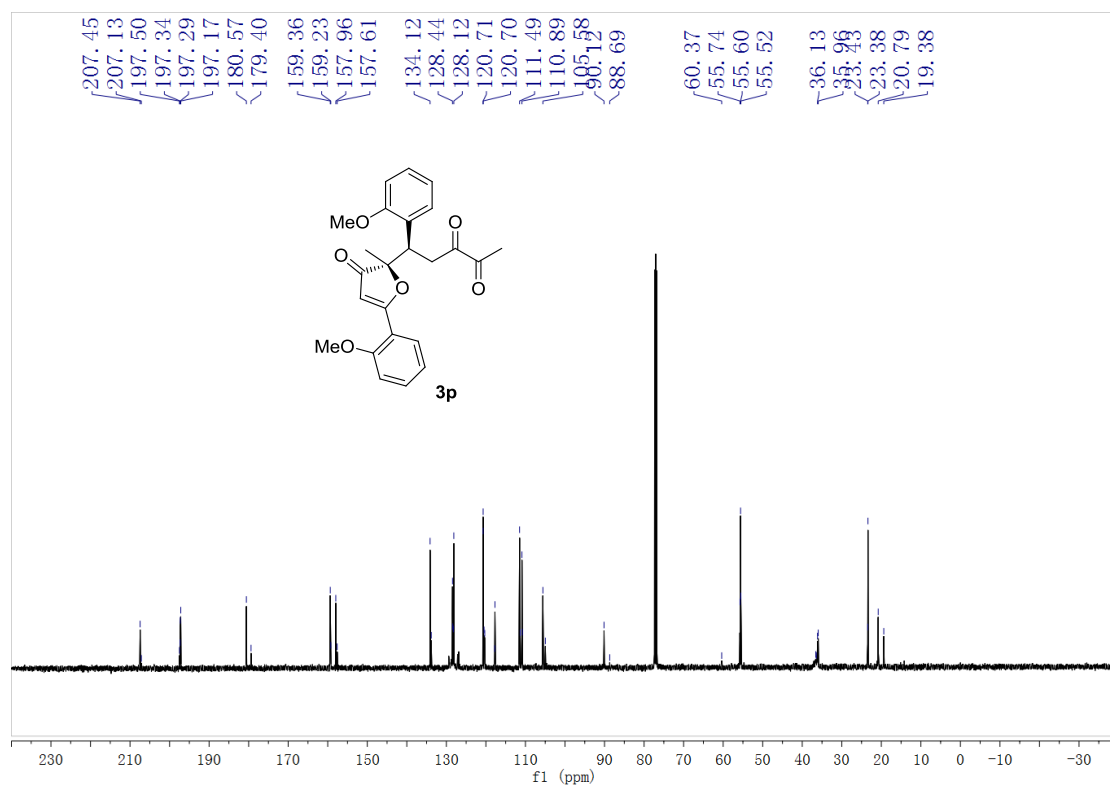



**<sup>1</sup>H NMR (500 MHz, CDCl<sub>3</sub>)**

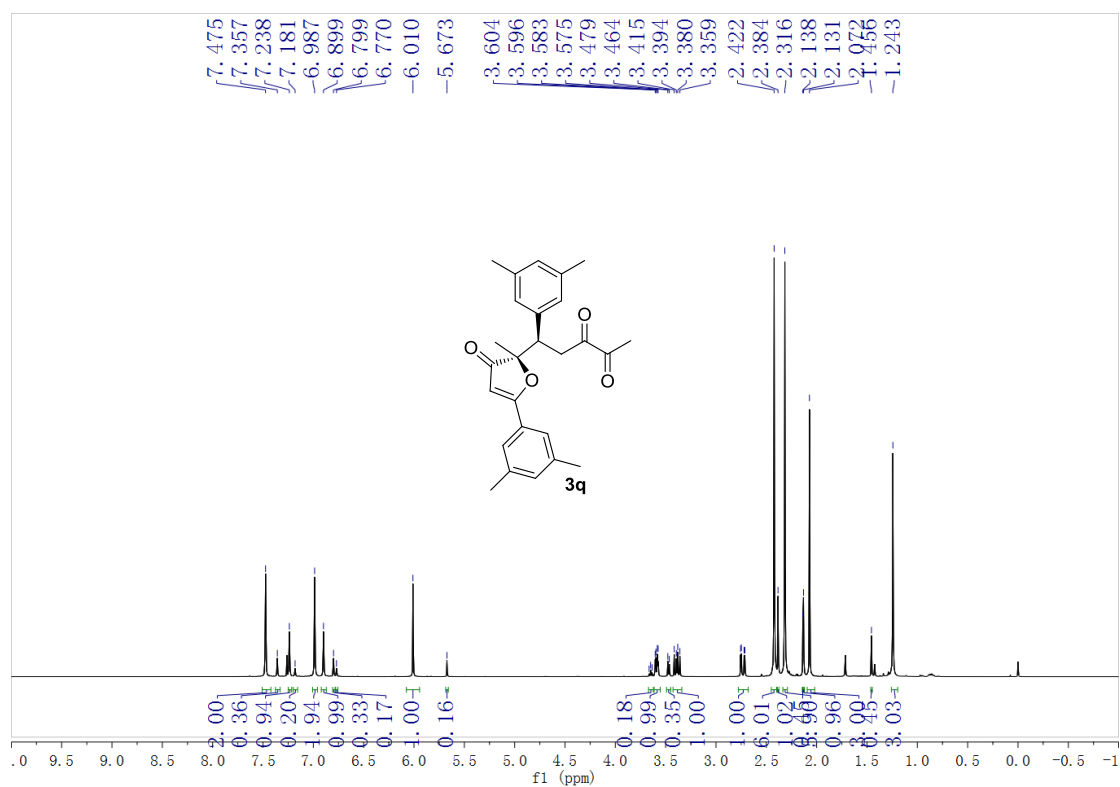

**<sup>13</sup>C NMR (125 MHz, CDCl<sub>3</sub>)**

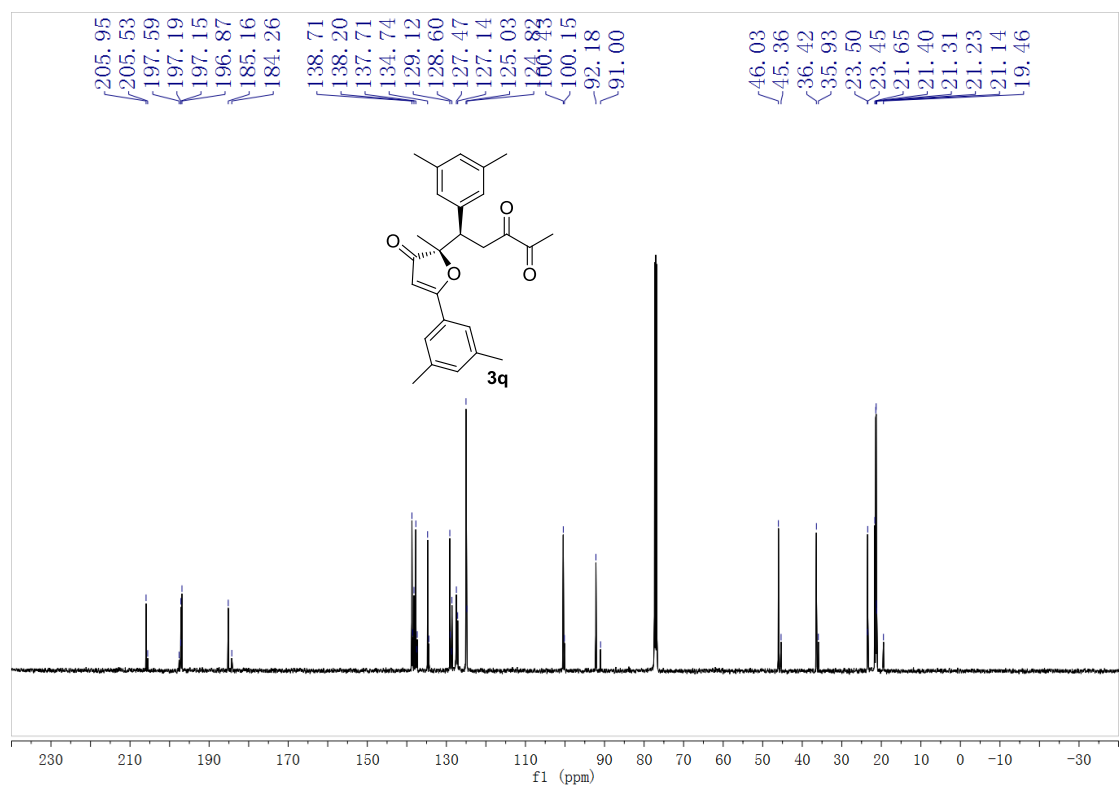

**<sup>1</sup>H NMR (500 MHz, CDCl<sub>3</sub>)**

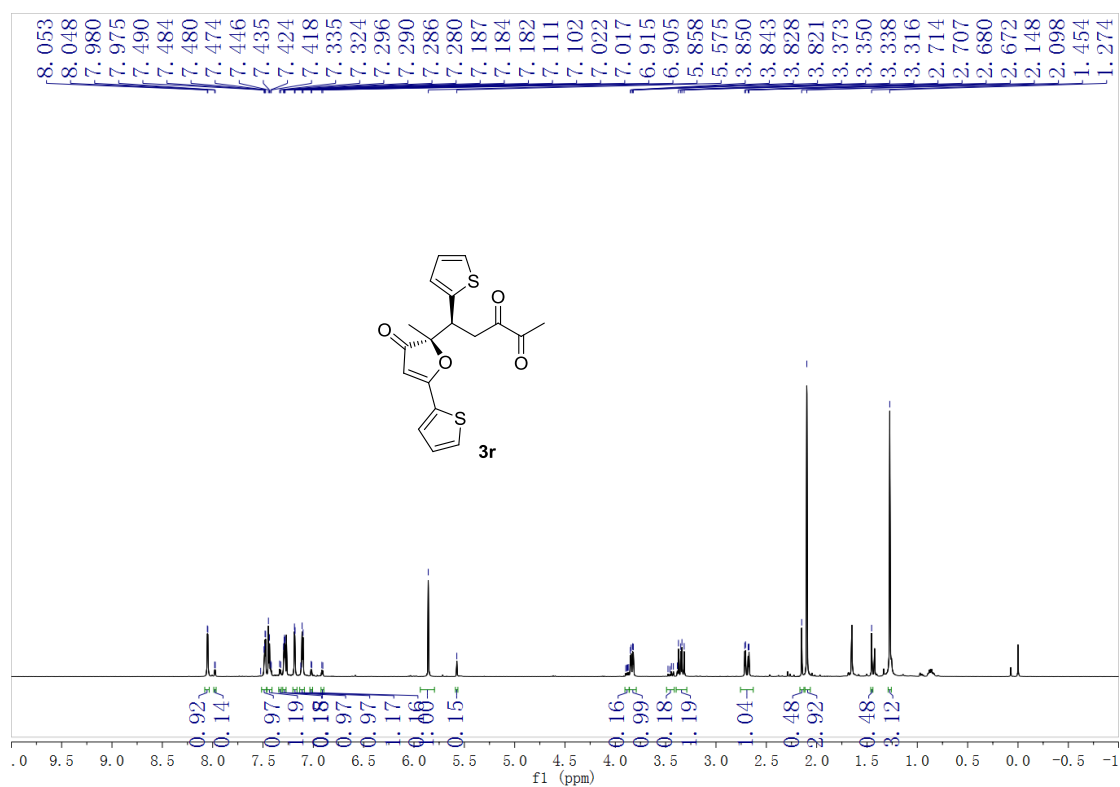

**<sup>13</sup>C NMR (125 MHz, CDCl<sub>3</sub>)**

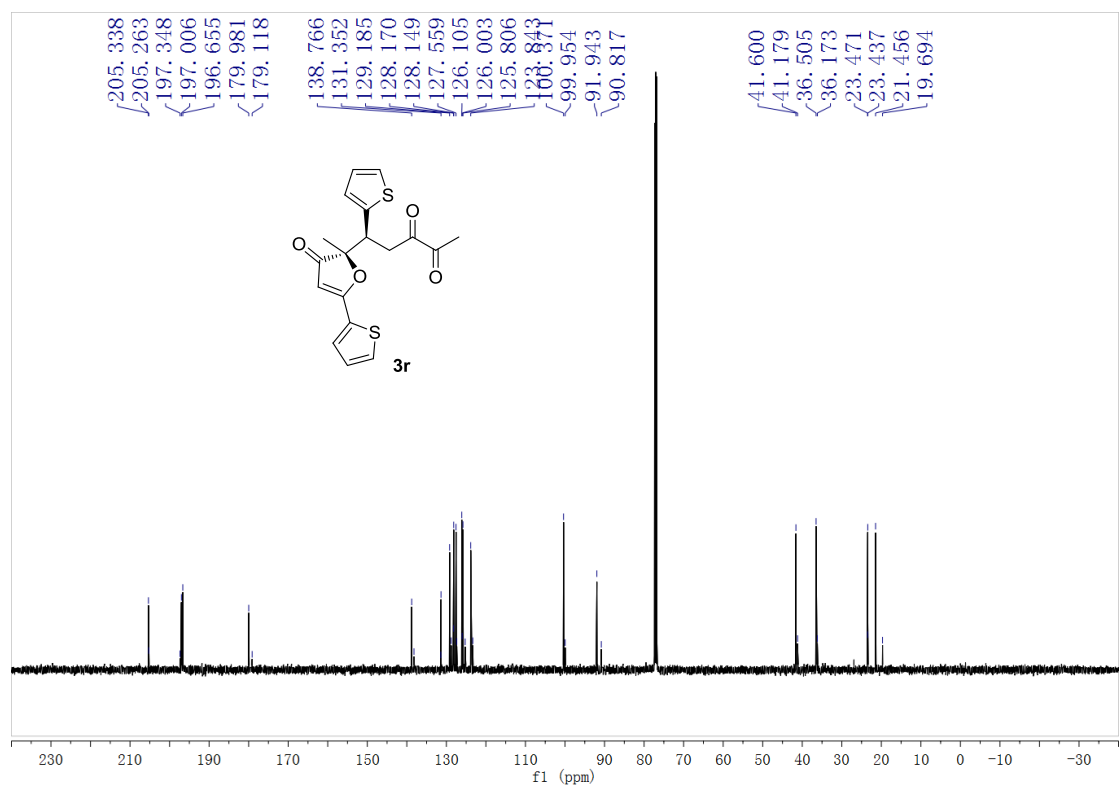

**<sup>1</sup>H NMR (500 MHz, CDCl<sub>3</sub>)**

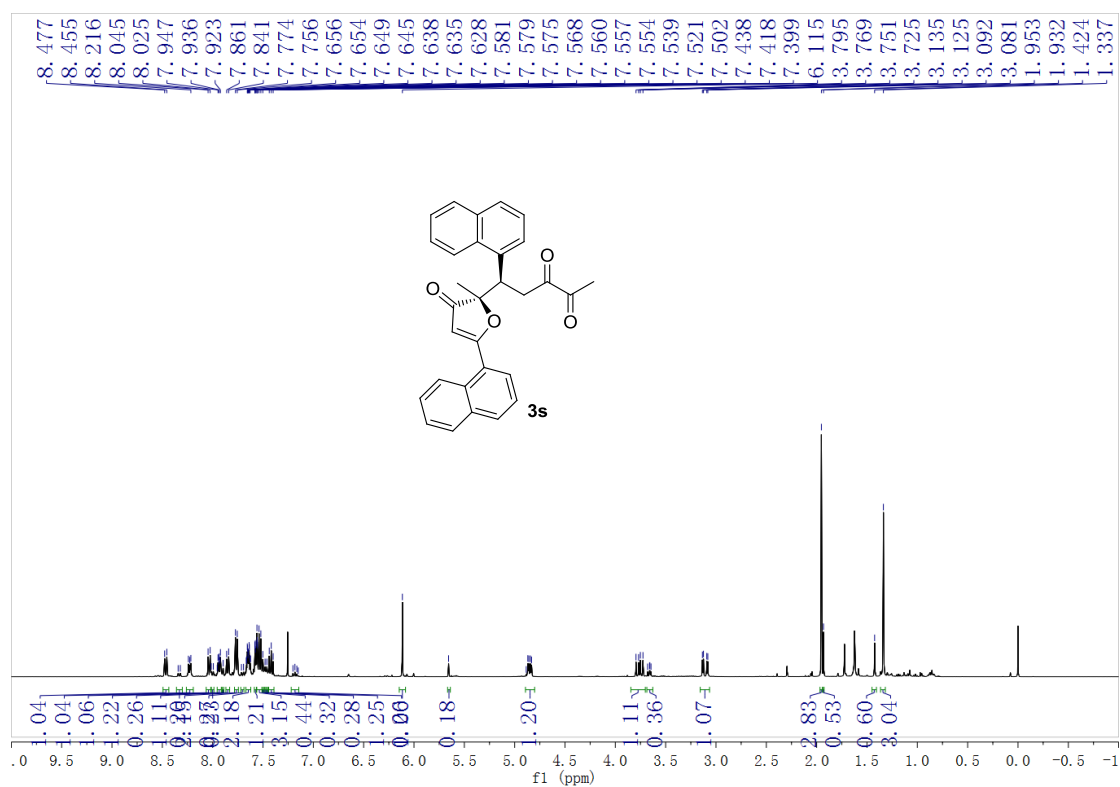

**<sup>13</sup>C NMR (100 MHz, CDCl<sub>3</sub>)**

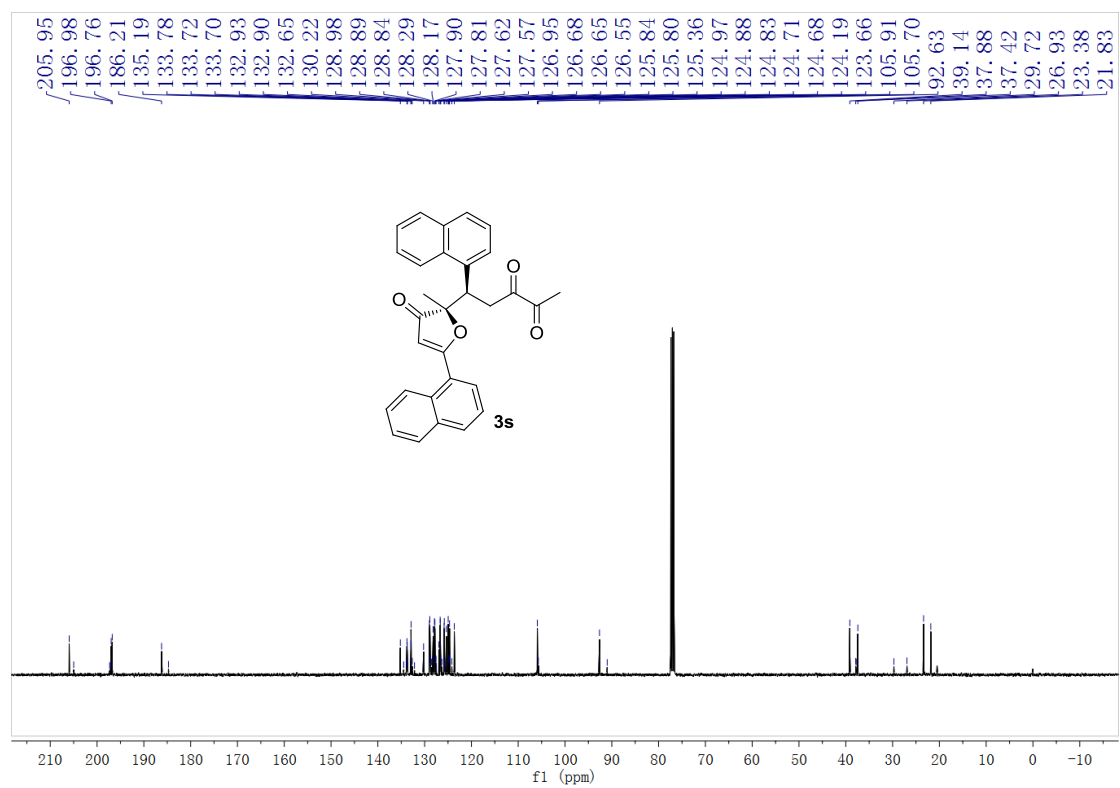

**<sup>1</sup>H NMR (500 MHz, CDCl<sub>3</sub>)**

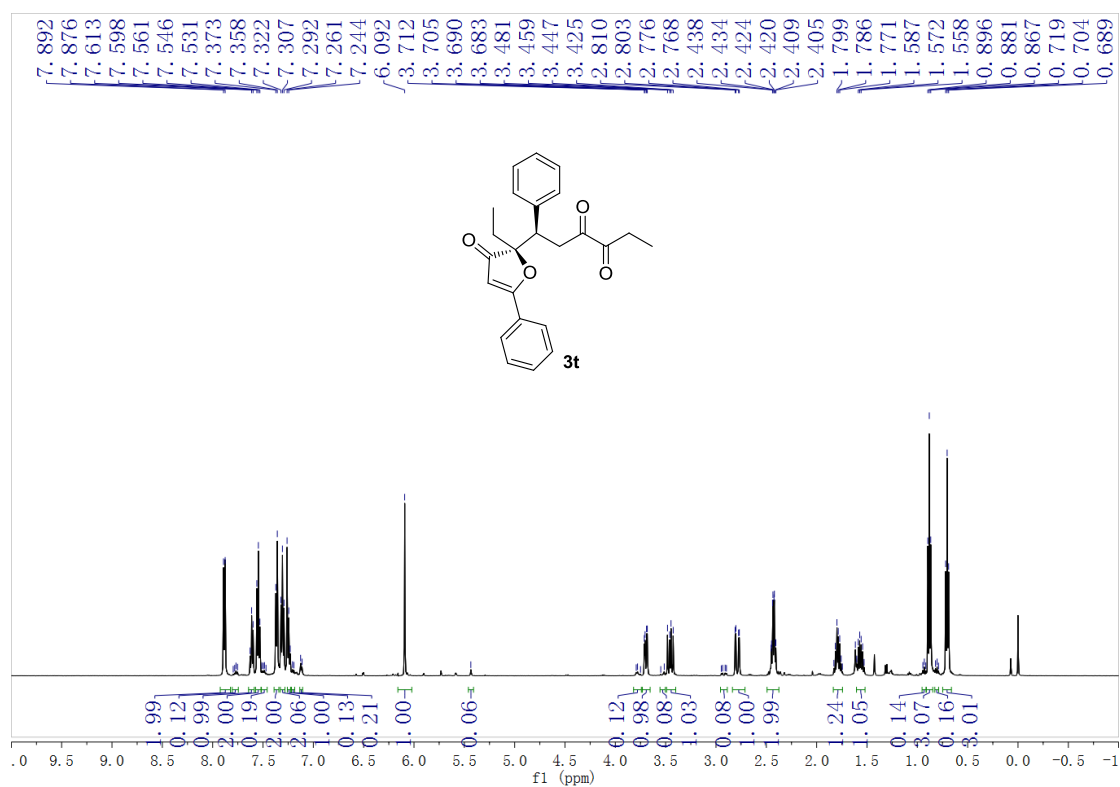

**<sup>13</sup>C NMR (125 MHz, CDCl<sub>3</sub>)**

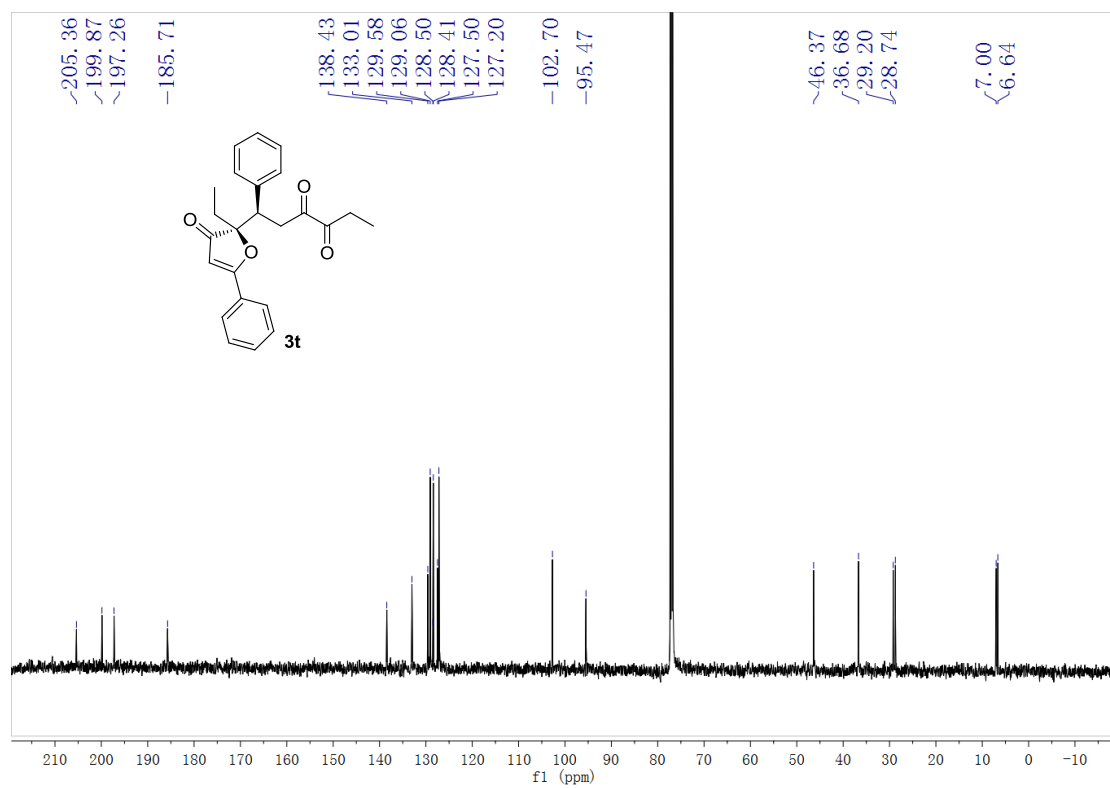

**<sup>1</sup>H NMR (500 MHz, CDCl<sub>3</sub>)**

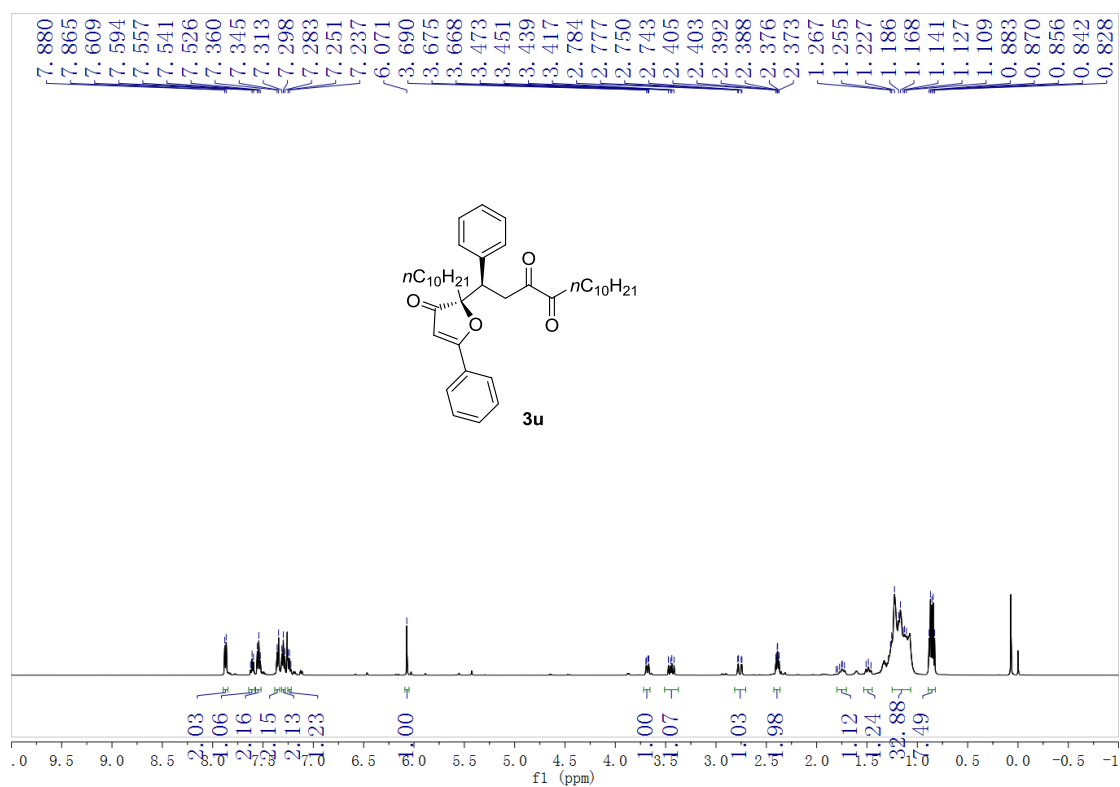

**<sup>13</sup>C NMR (125 MHz, CDCl<sub>3</sub>)**

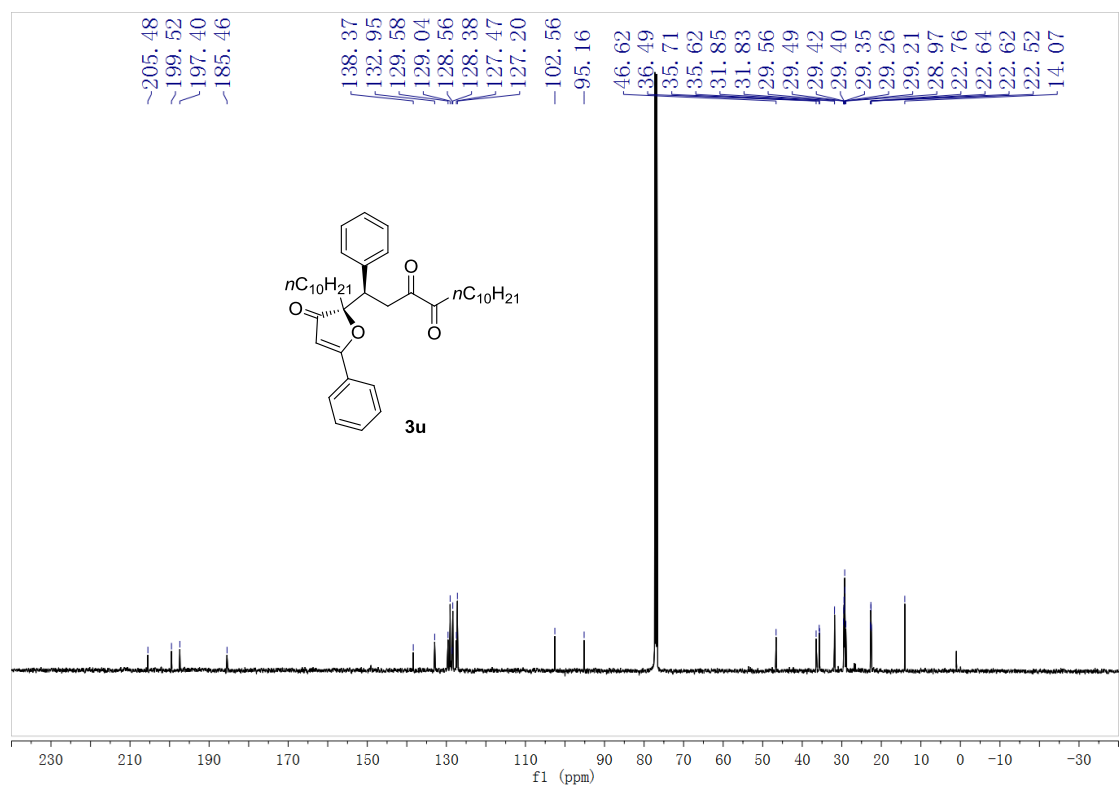

### <sup>1</sup>H NMR (500 MHz, CDCl<sub>3</sub>)

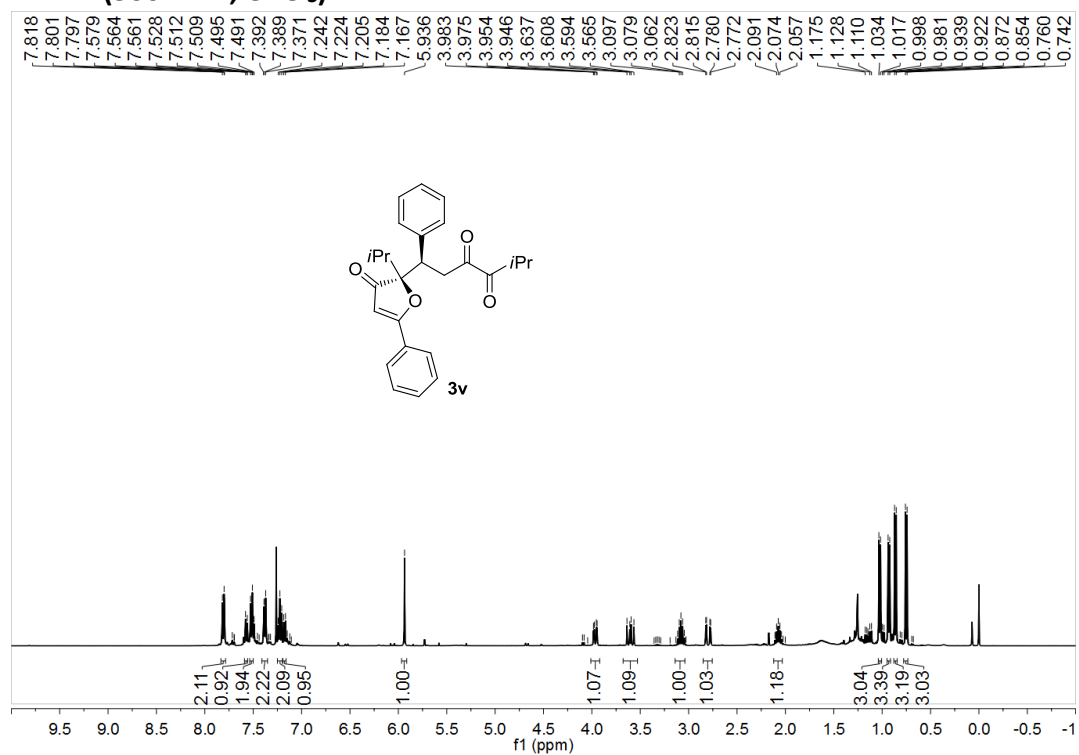

### <sup>13</sup>C NMR (125 MHz, CDCl<sub>3</sub>)

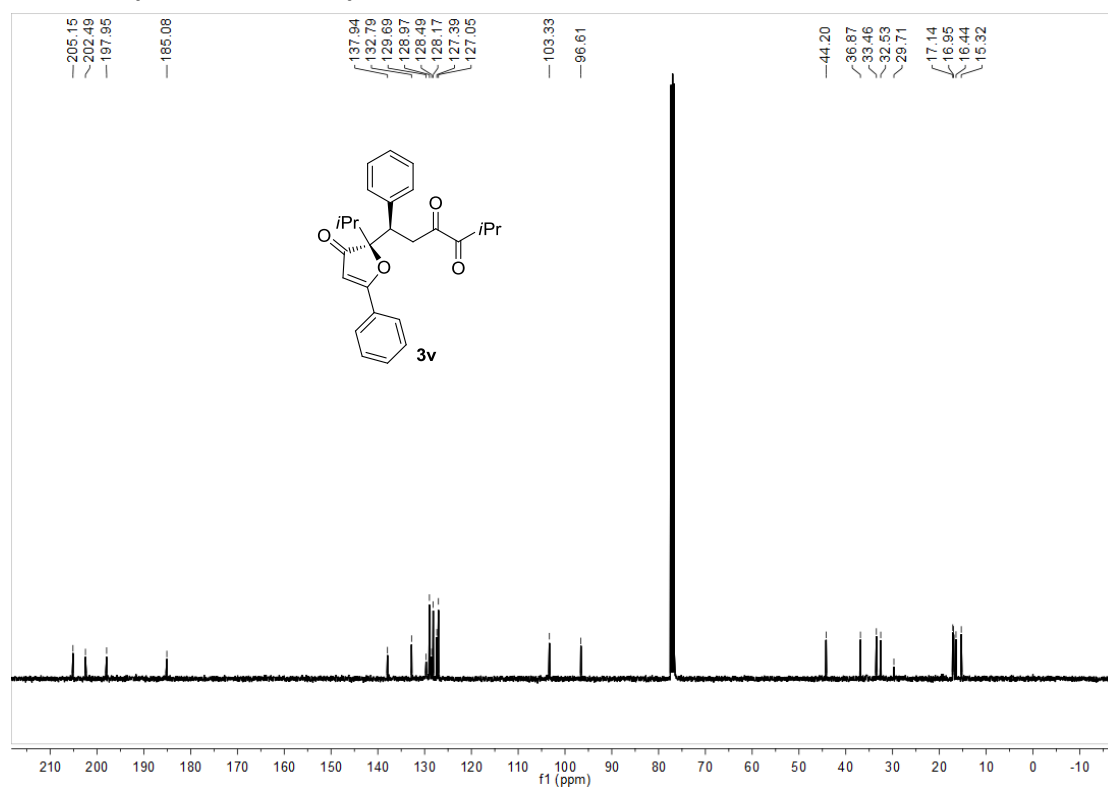

**<sup>1</sup>H NMR (500 MHz, CDCl<sub>3</sub>)**

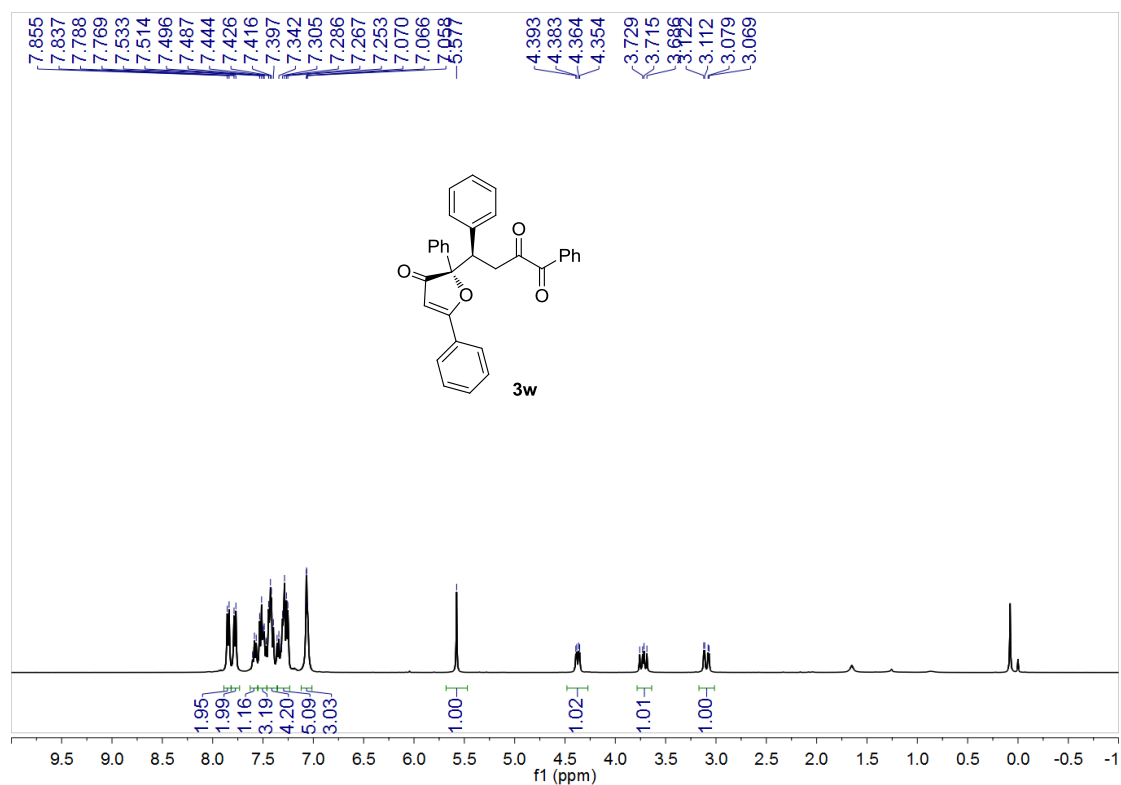

**<sup>13</sup>C NMR (125 MHz, CDCl<sub>3</sub>)**

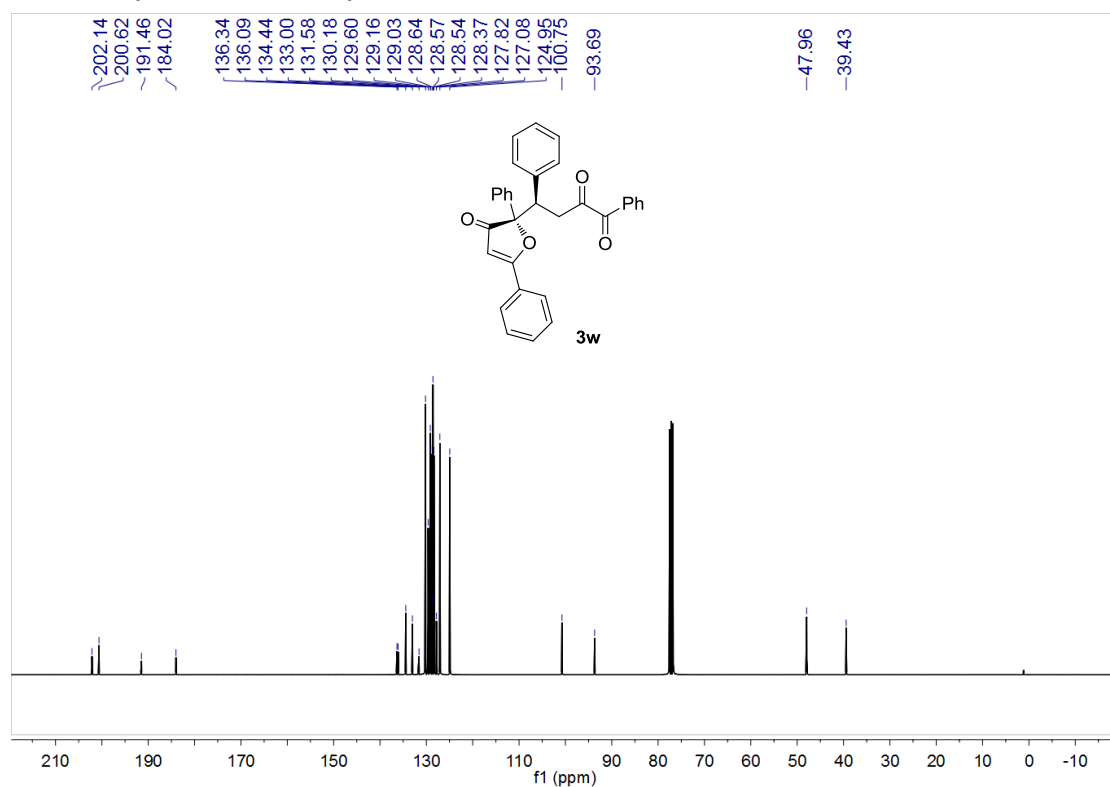

**<sup>1</sup>H NMR (500 MHz, CDCl<sub>3</sub>)**

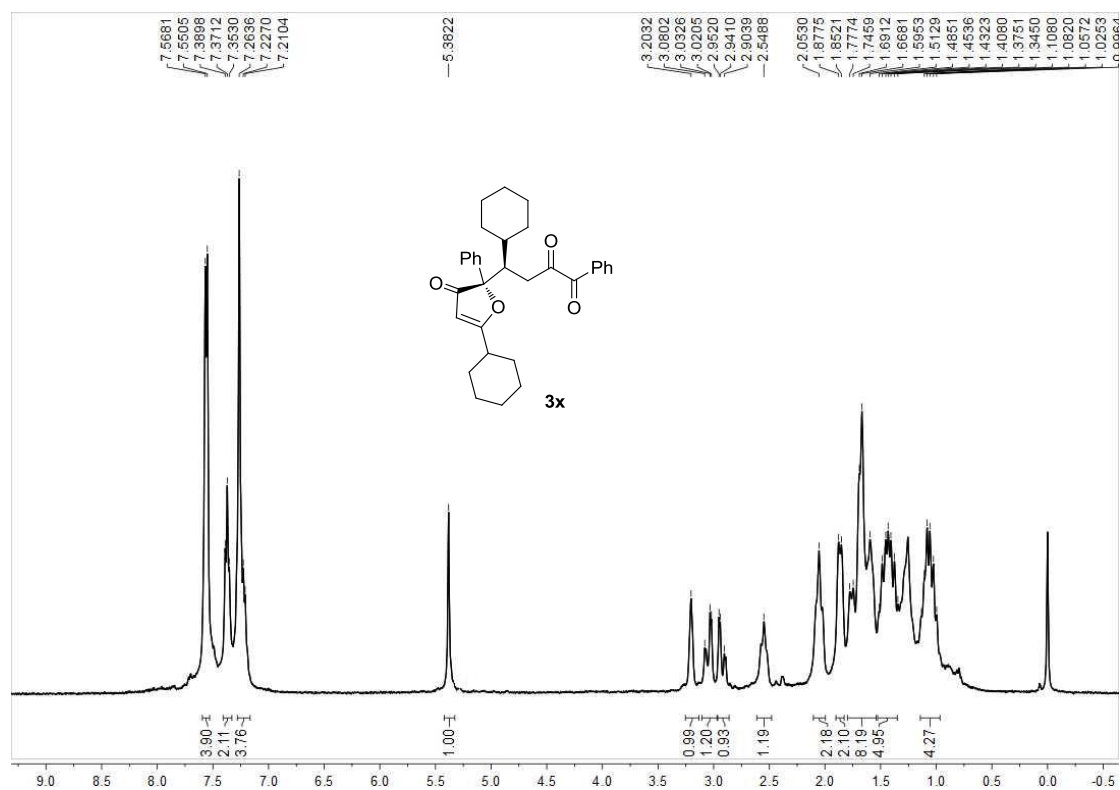

**<sup>13</sup>C NMR (125 MHz, CDCl<sub>3</sub>)**

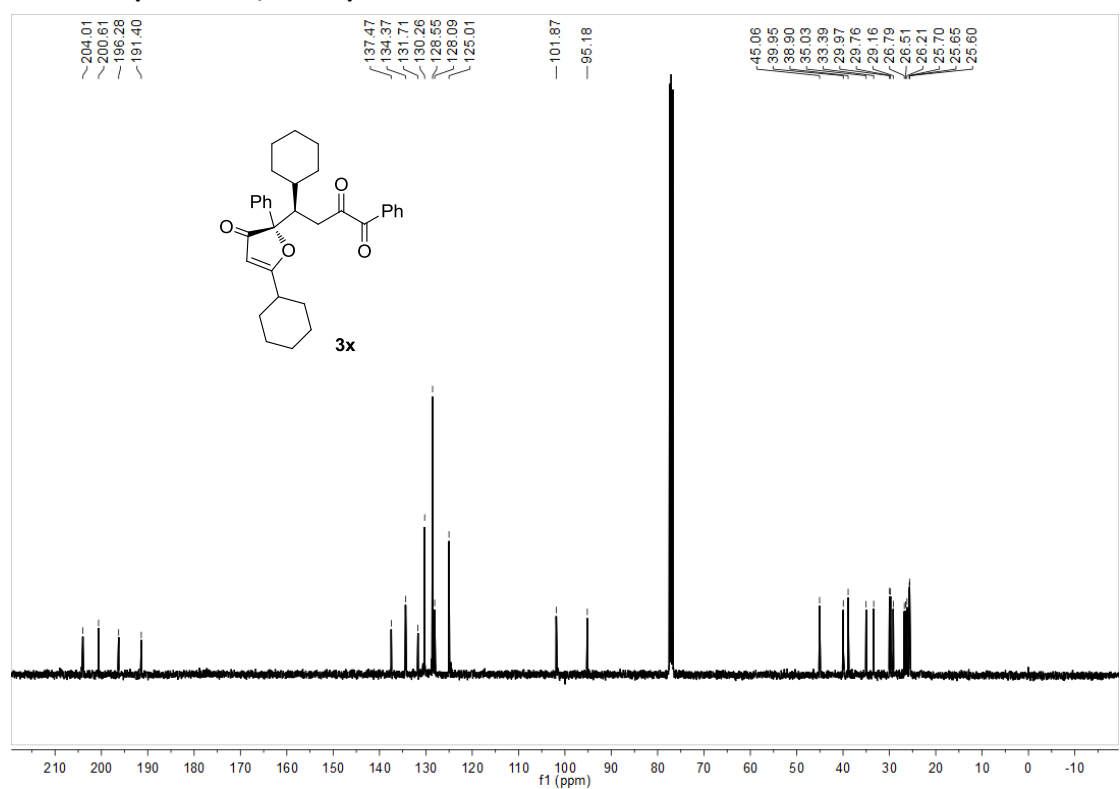



**<sup>1</sup>H NMR (500 MHz, CDCl<sub>3</sub>)**

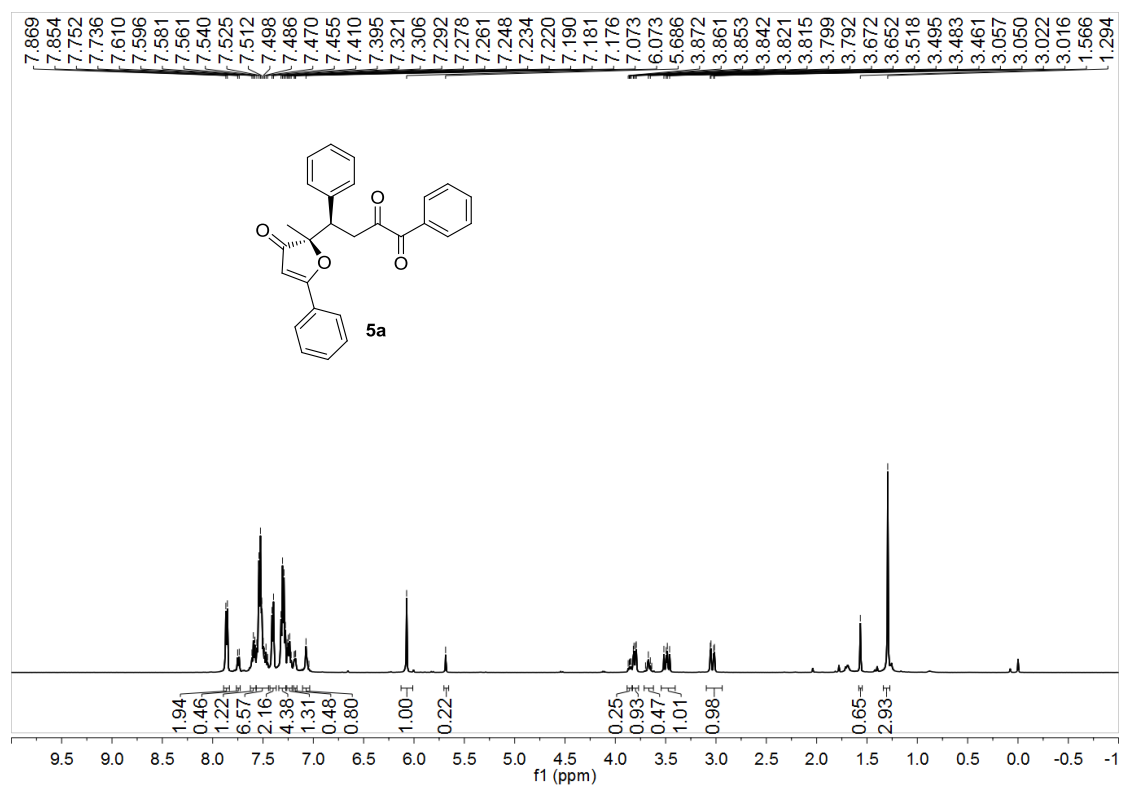

**<sup>13</sup>C NMR (125 MHz, CDCl<sub>3</sub>)**

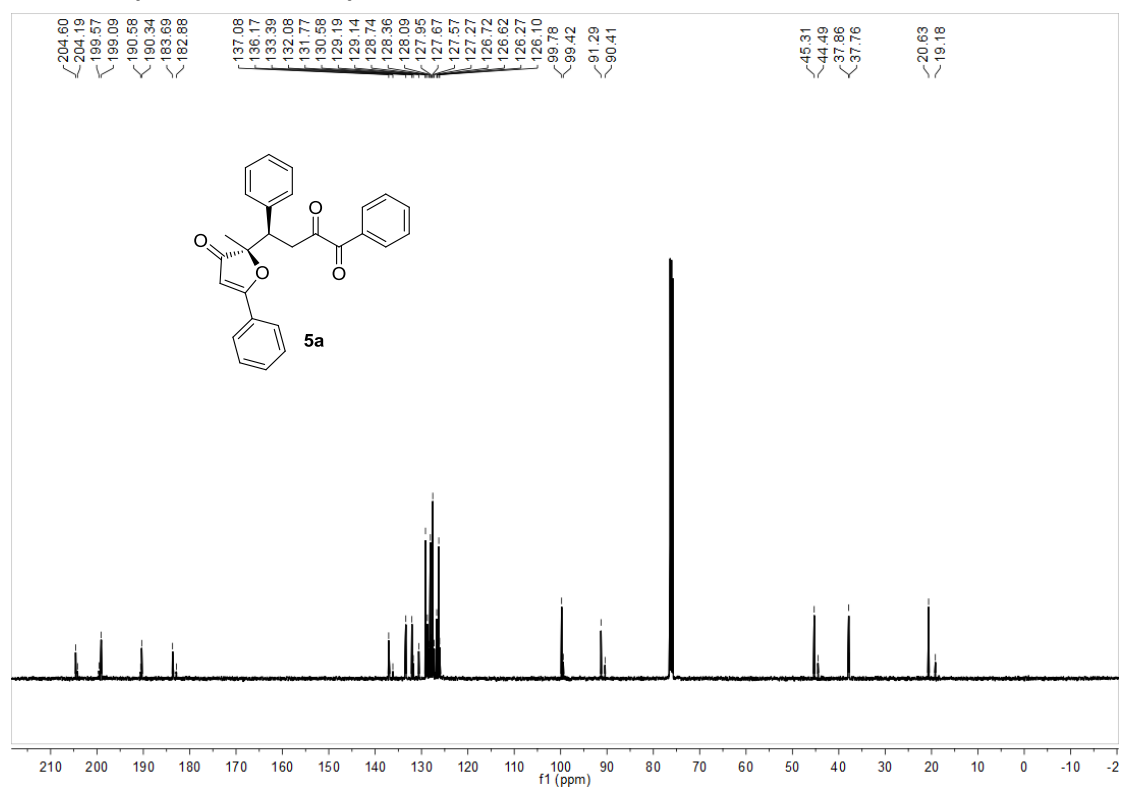

**<sup>1</sup>H NMR (500 MHz, CDCl<sub>3</sub>)**

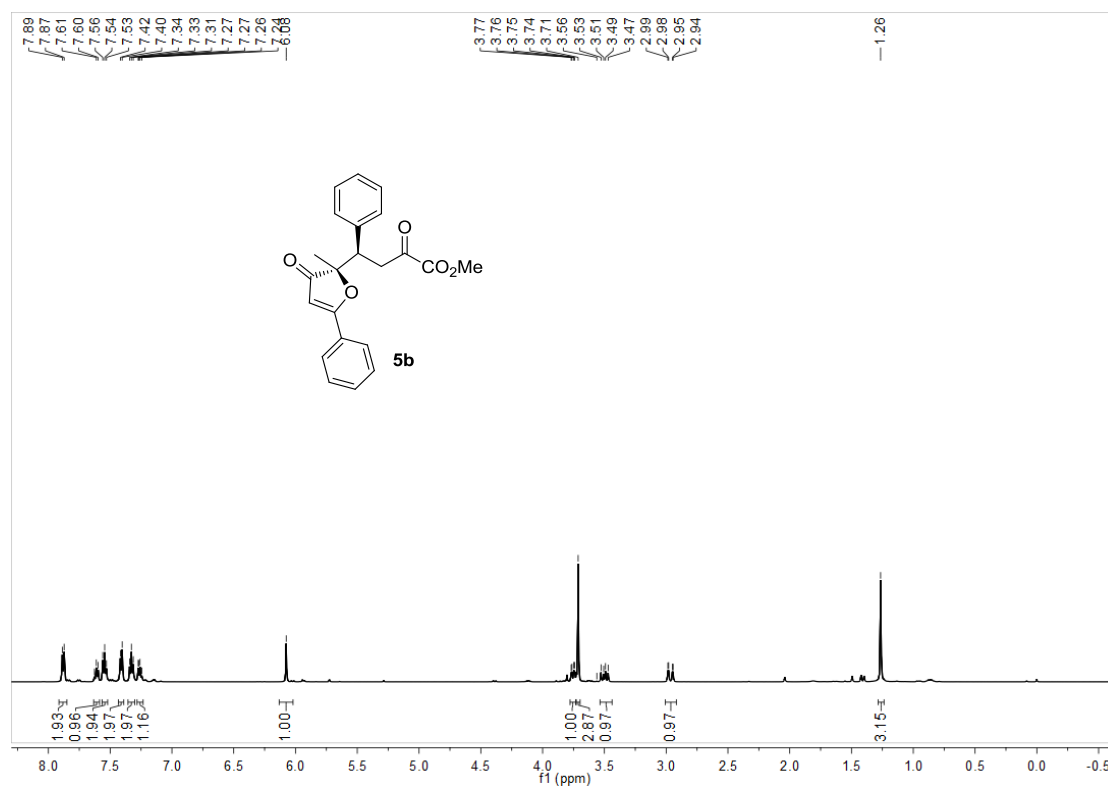

**<sup>13</sup>C NMR (125 MHz, CDCl<sub>3</sub>)**

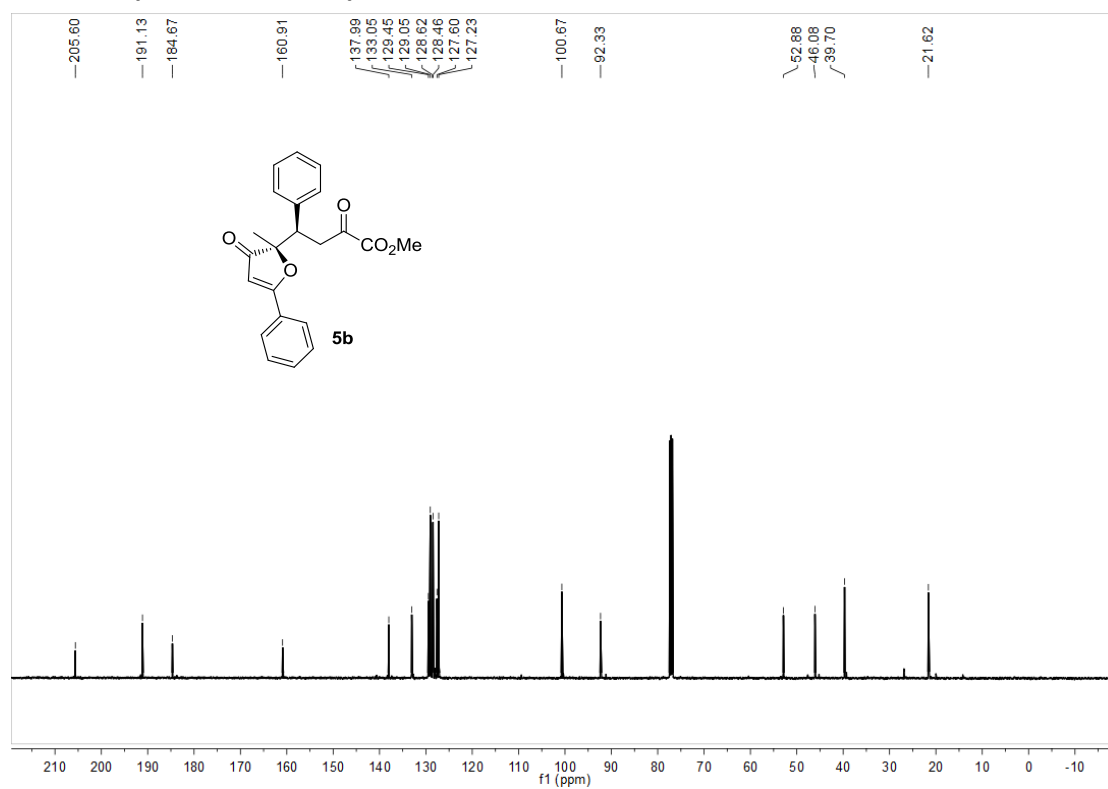

### <sup>1</sup>H NMR (500 MHz, CDCl<sub>3</sub>)

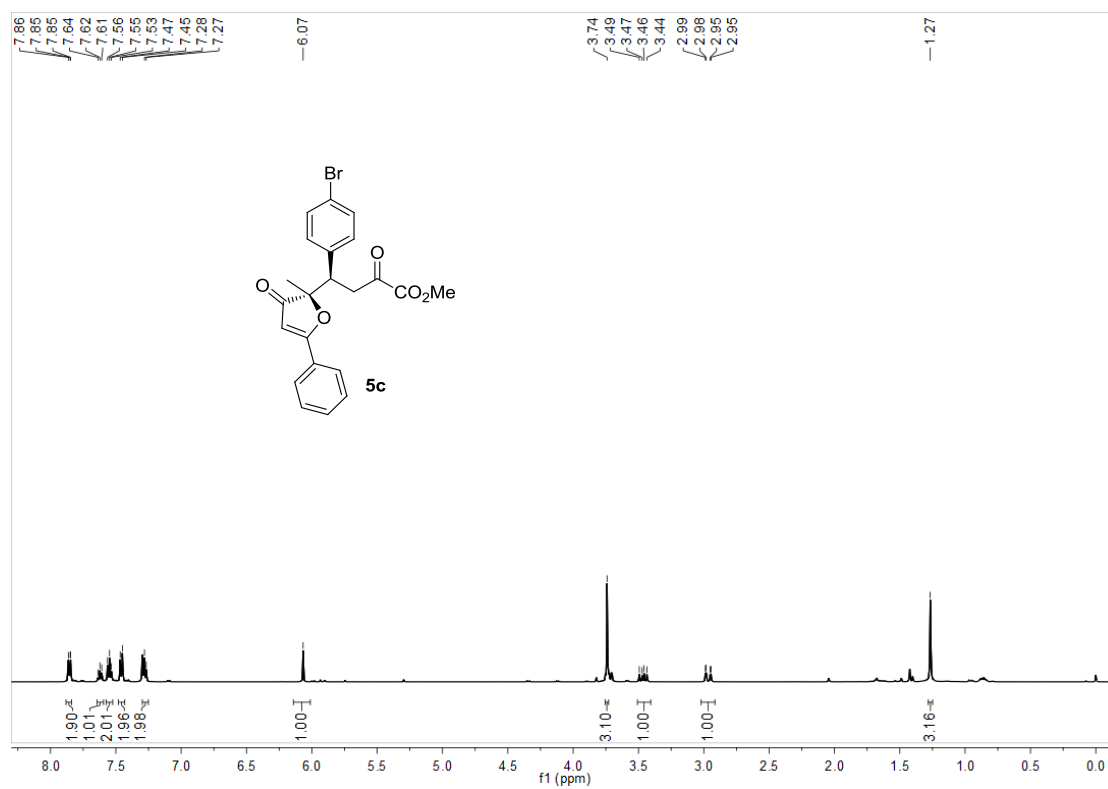

### <sup>13</sup>C NMR (125 MHz, CDCl<sub>3</sub>)

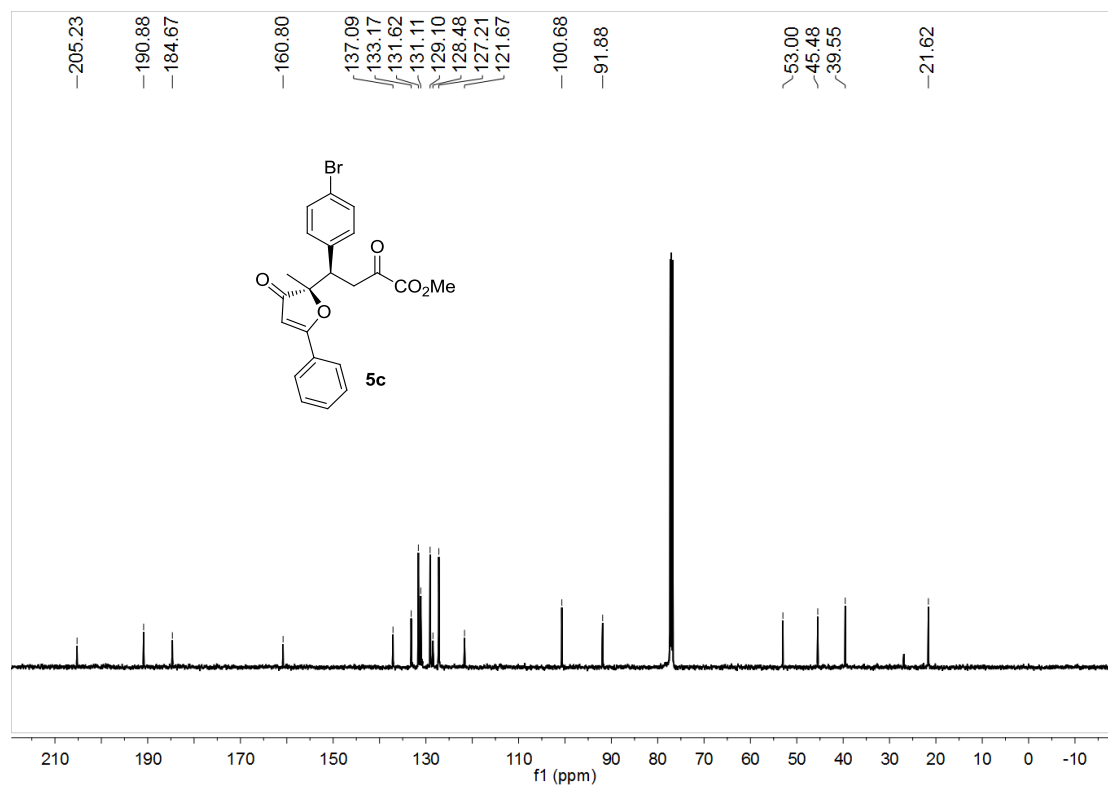

**<sup>1</sup>H NMR (500 MHz, CDCl<sub>3</sub>)**

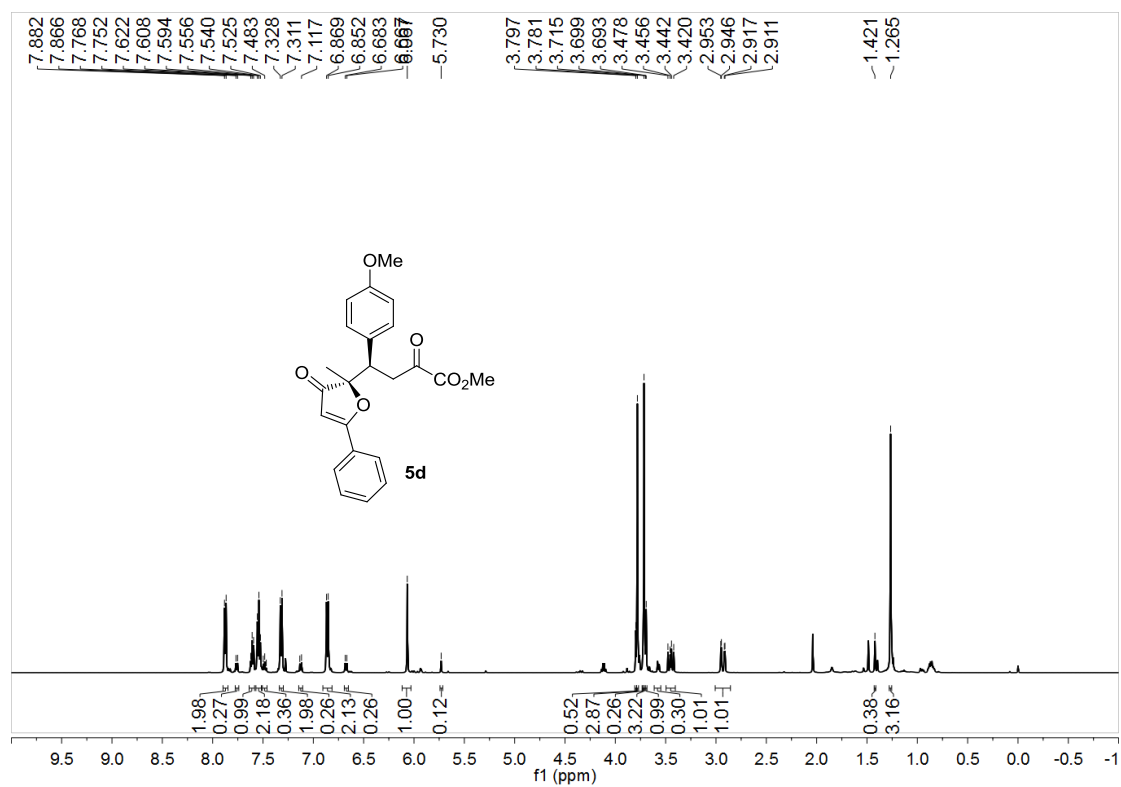

**<sup>13</sup>C NMR (125 MHz, CDCl<sub>3</sub>)**

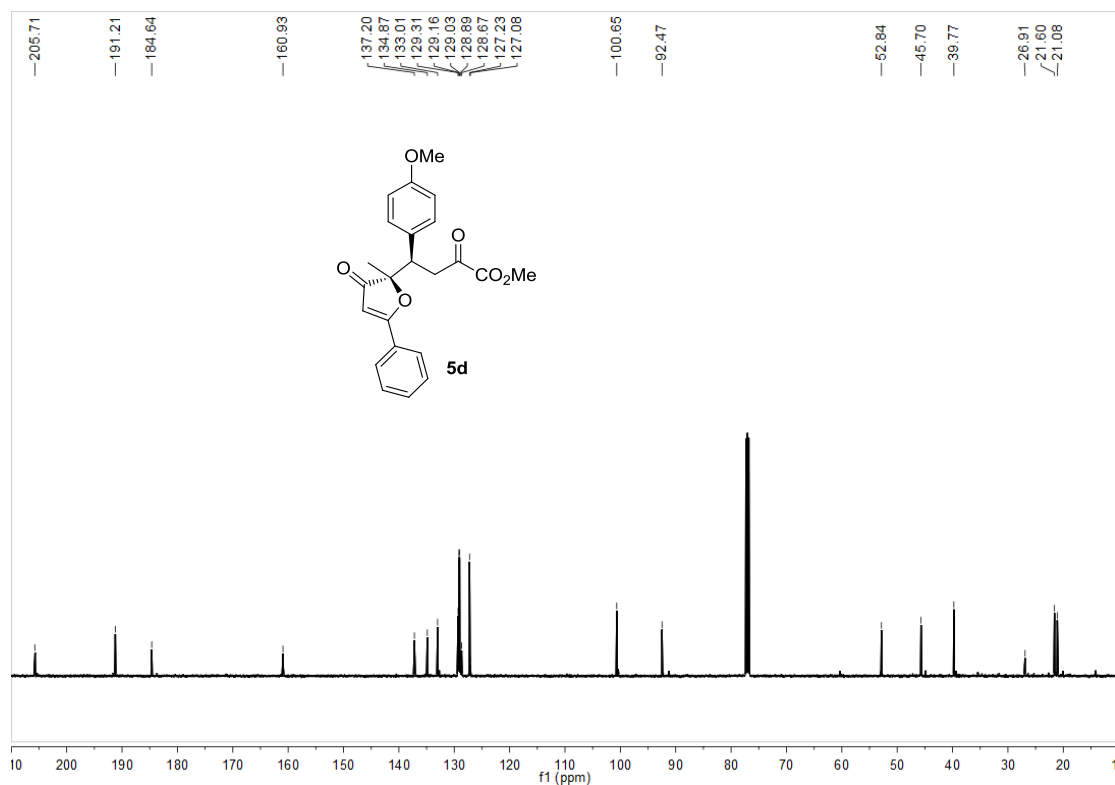

**<sup>1</sup>H NMR (500 MHz, CDCl<sub>3</sub>)**

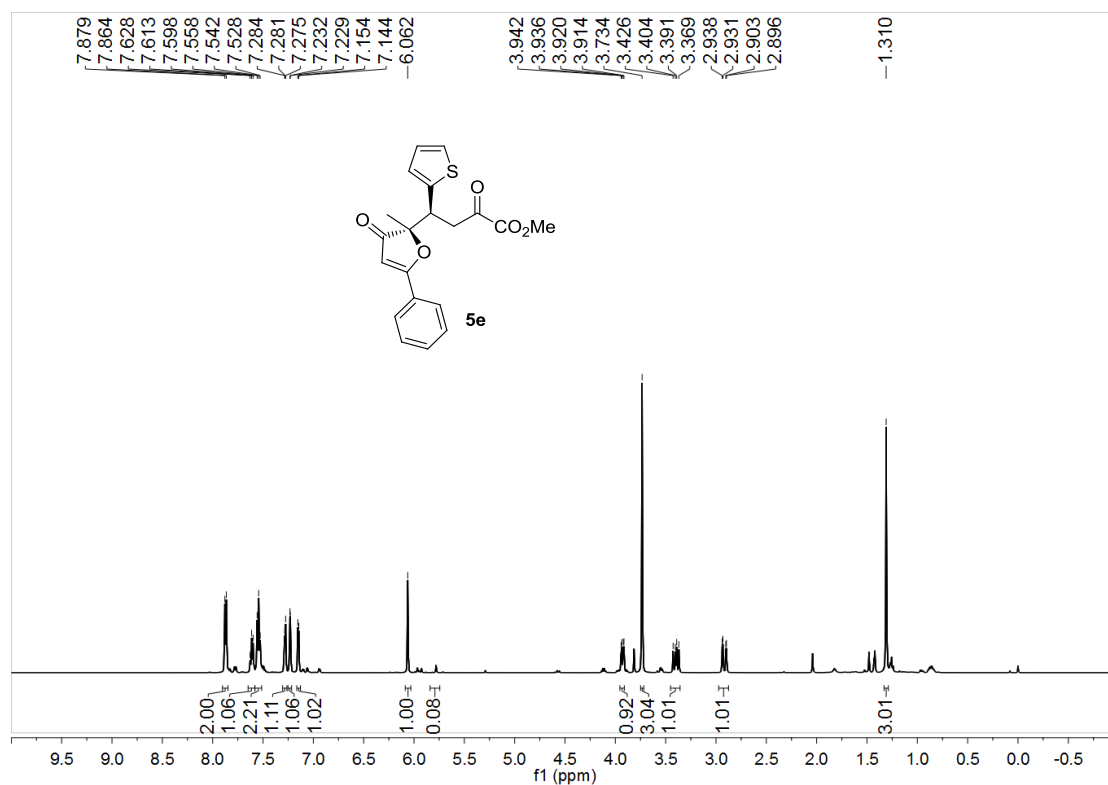

**<sup>13</sup>C NMR (125 MHz, CDCl<sub>3</sub>)**

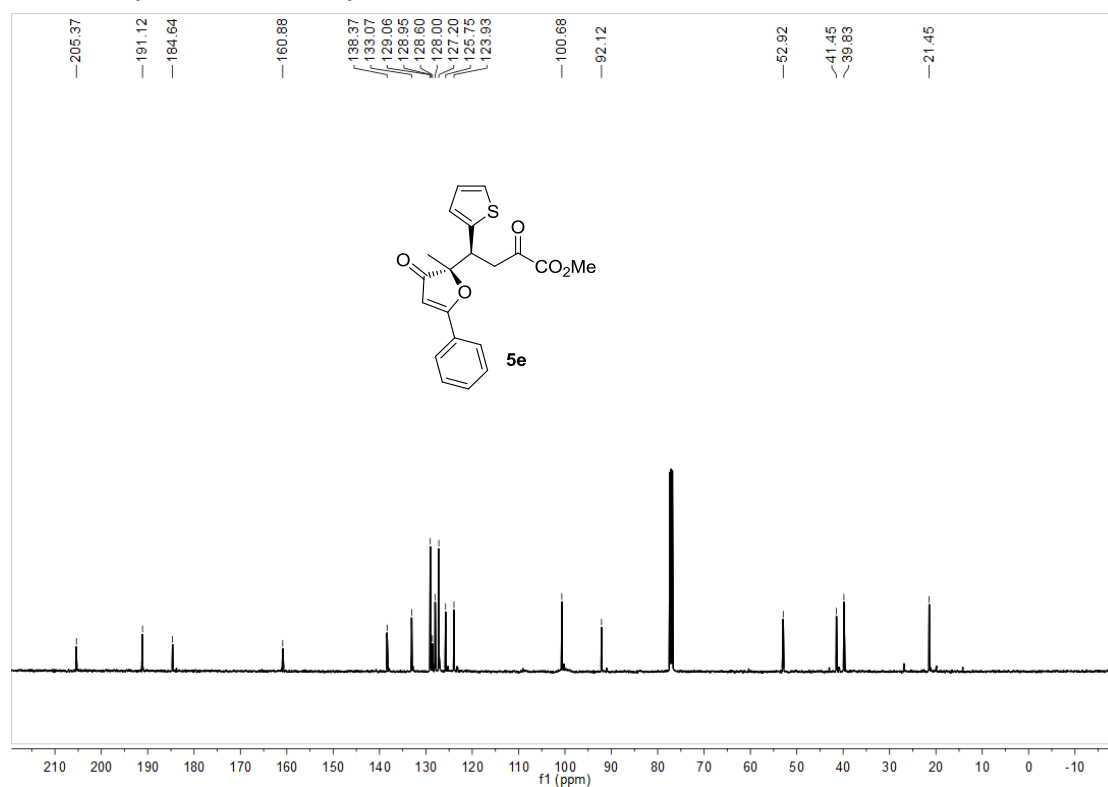

**<sup>1</sup>H NMR (500 MHz, CDCl<sub>3</sub>)**

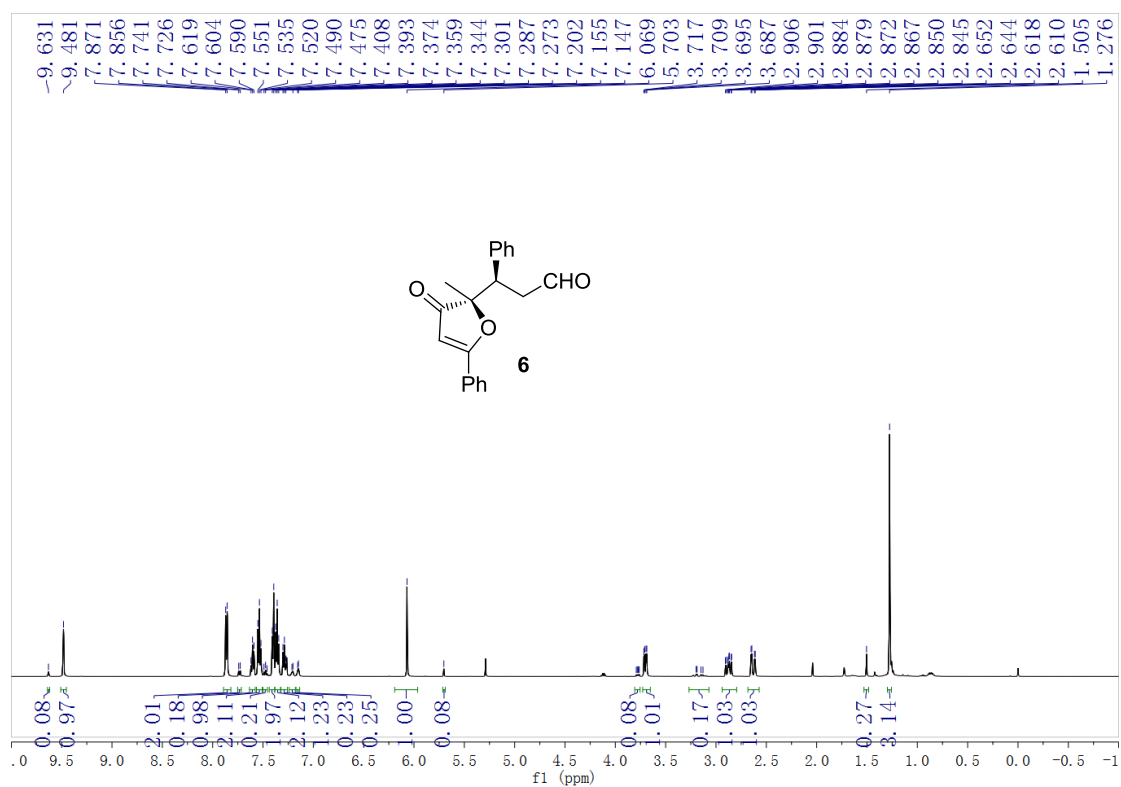

**<sup>13</sup>C NMR (125 MHz, CDCl<sub>3</sub>)**

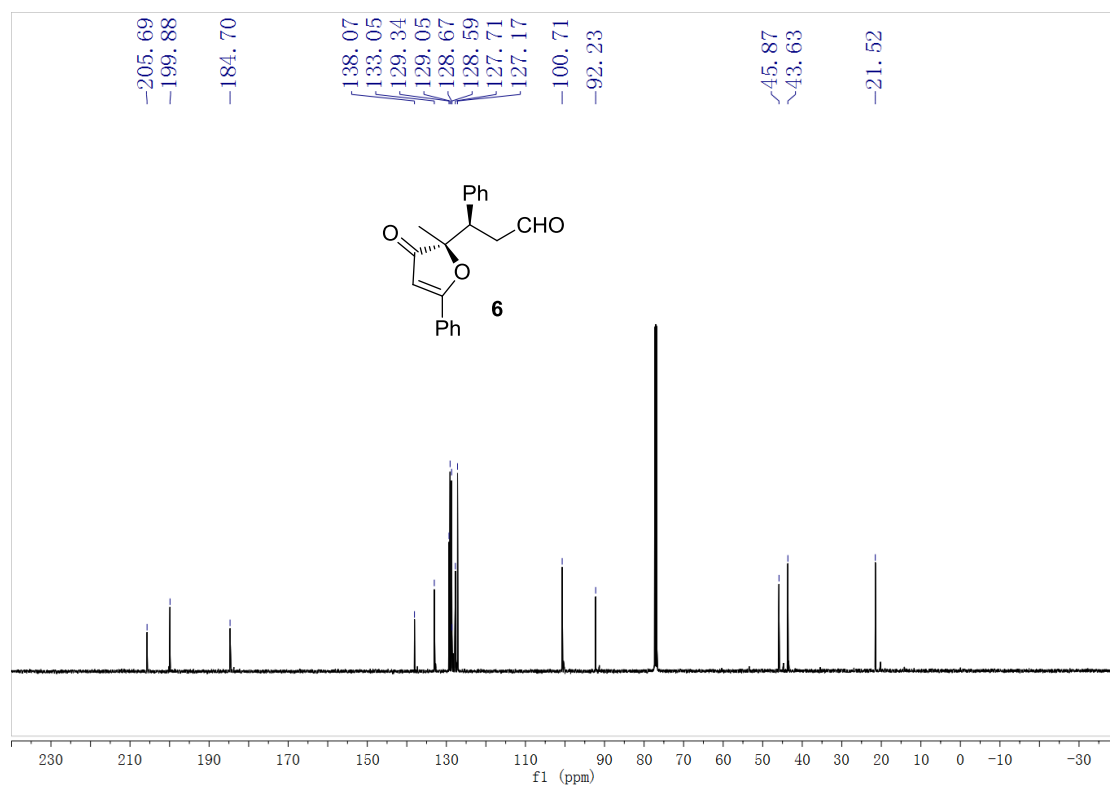

**<sup>1</sup>H NMR (500 MHz, CDCl<sub>3</sub>)**

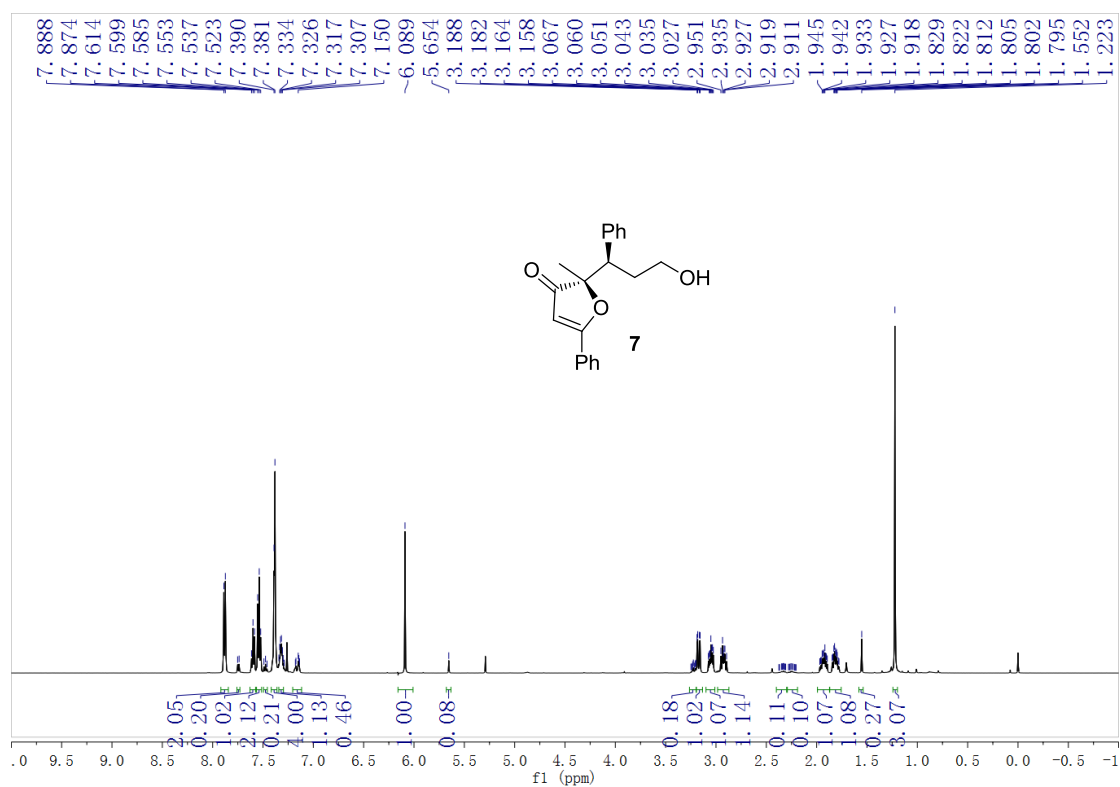

**<sup>13</sup>C NMR (125 MHz, CDCl<sub>3</sub>)**

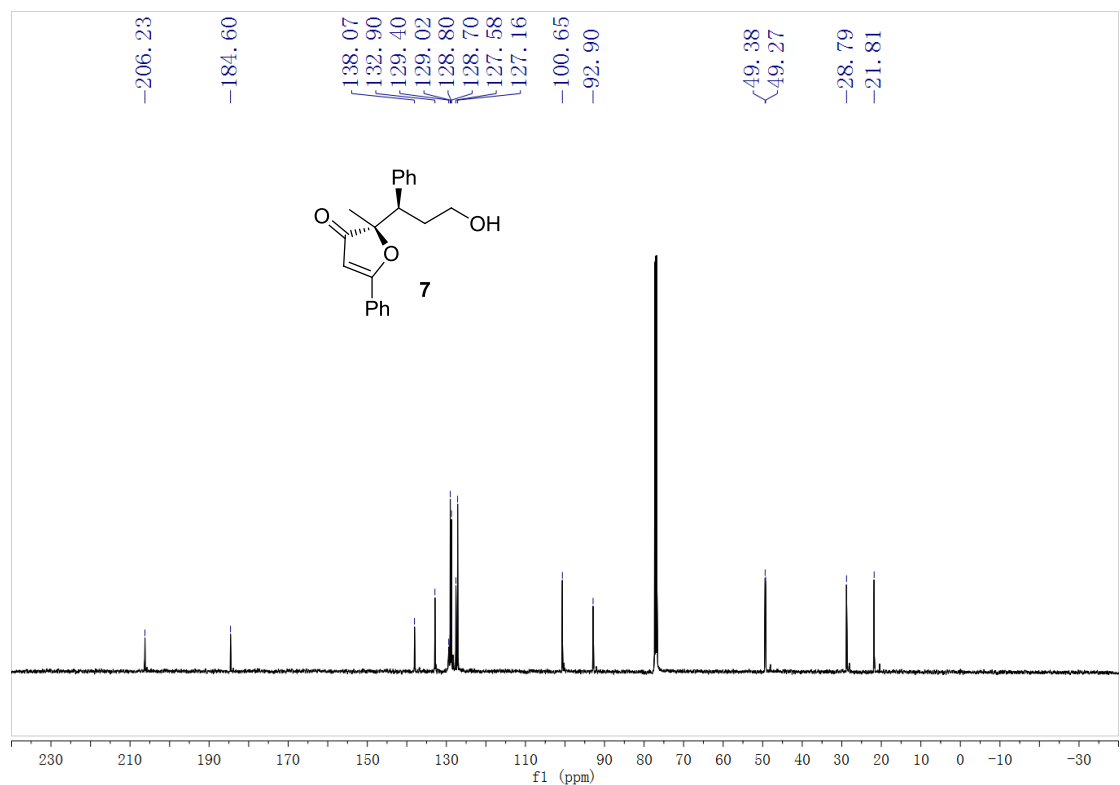

**<sup>1</sup>H NMR (500 MHz, CDCl<sub>3</sub>)**

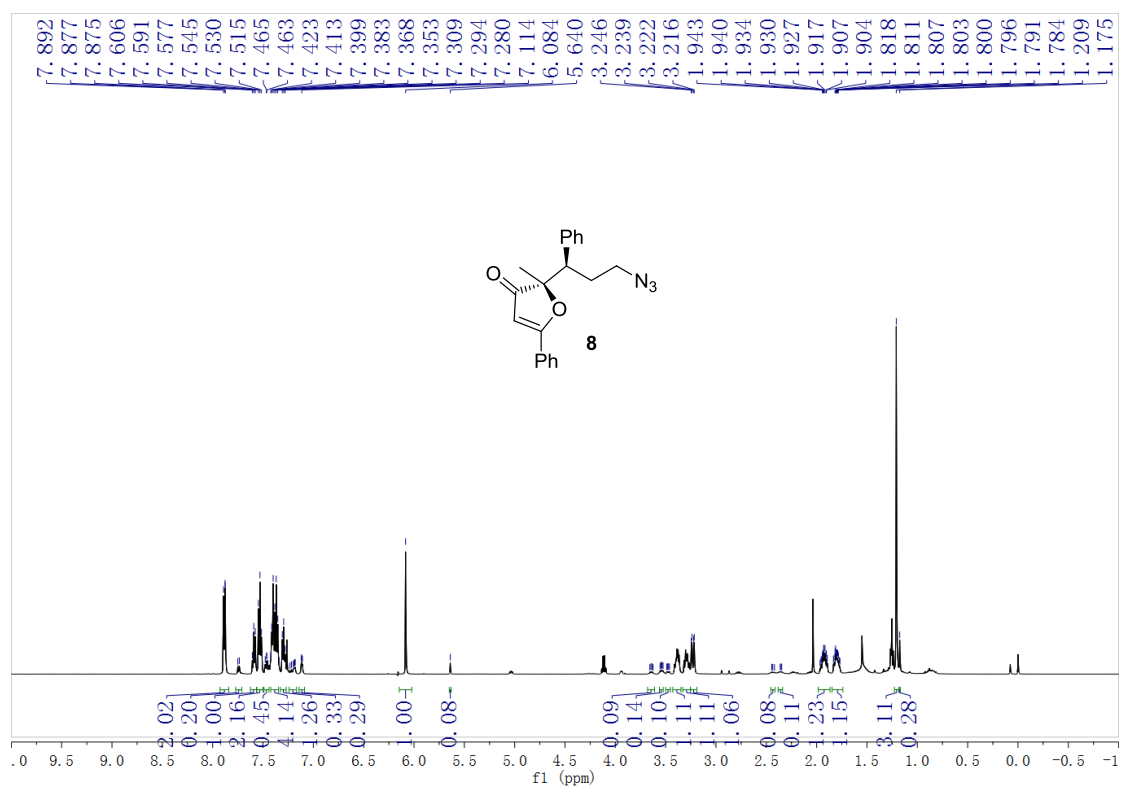

**<sup>13</sup>C NMR (125 MHz, CDCl<sub>3</sub>)**

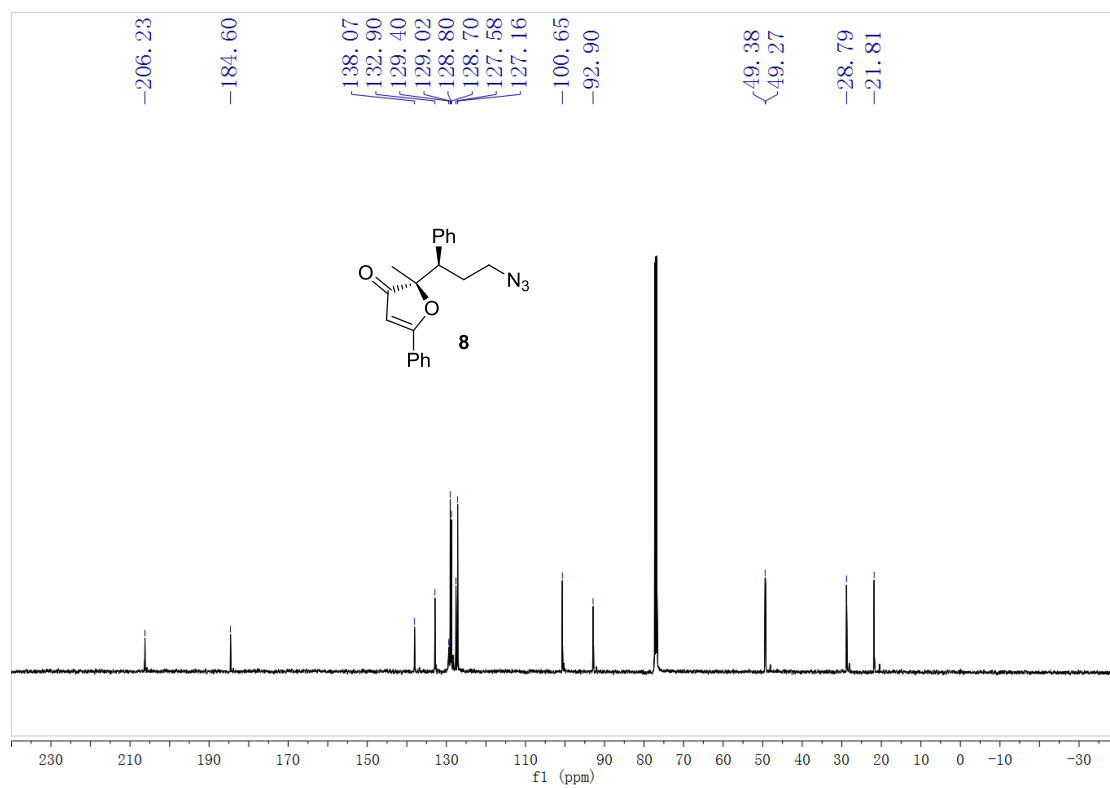



## VII. HPLC Charts

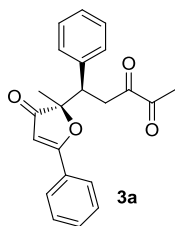

Chiral HPLC spectrum of racemic **3a**

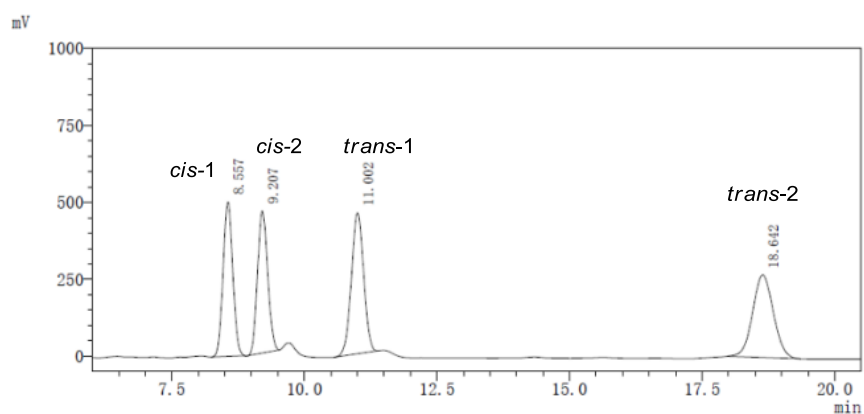

<Peak Results>

| Ch2 210nm |        |         |        |        |         |
|-----------|--------|---------|--------|--------|---------|
| Index     | Time   | Area    | Area%  | Height | Height% |
| 1         | 8.557  | 6403115 | 23.466 | 501620 | 29.707  |
| 2         | 9.207  | 6190060 | 22.685 | 461214 | 27.315  |
| 3         | 11.002 | 7394346 | 27.098 | 457939 | 27.121  |
| 4         | 18.642 | 7299421 | 26.751 | 267757 | 15.857  |

Chiral HPLC spectrum of chiral **3a**

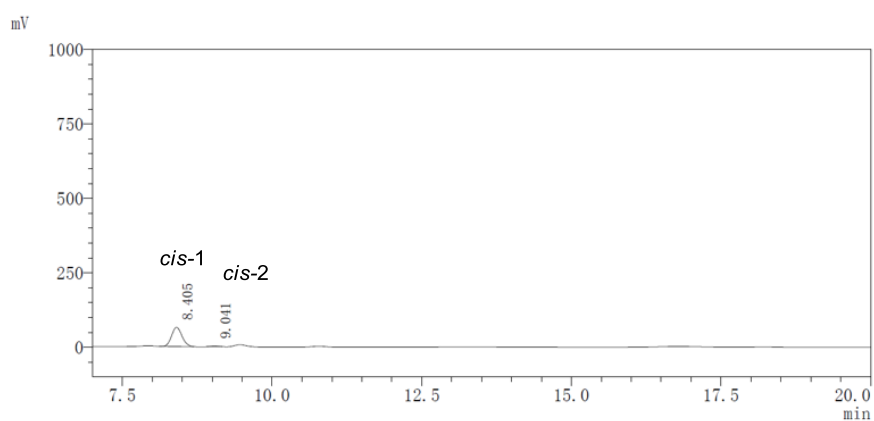

<Peak Results>

| Ch2 254nm |       |        |        |        |         |
|-----------|-------|--------|--------|--------|---------|
| Index     | Time  | Area   | Area%  | Height | Height% |
| 1         | 8.405 | 777519 | 97.716 | 64390  | 96.927  |
| 2         | 9.041 | 18174  | 2.284  | 2042   | 3.073   |

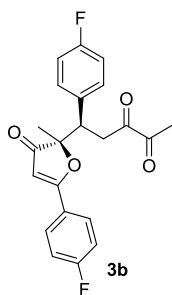

**Chiral HPLC spectrum of racemic 3b**

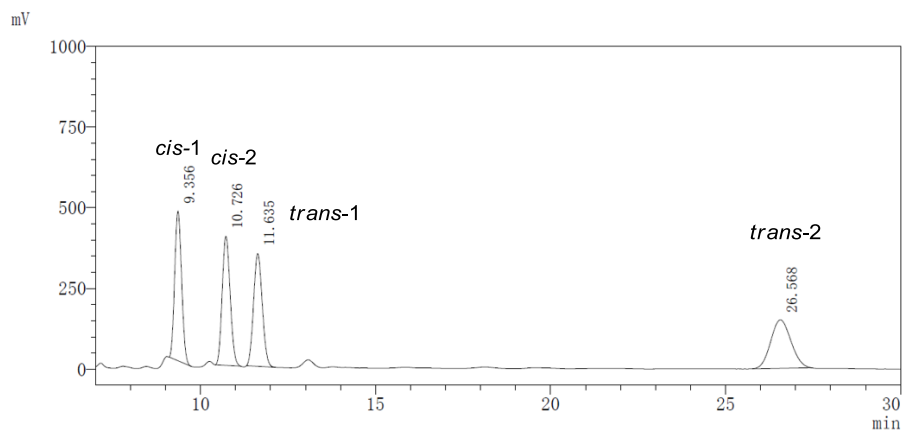

<Peak Results>

| Ch2 210nm |        |         |        |        |         |
|-----------|--------|---------|--------|--------|---------|
| Index     | Time   | Area    | Area%  | Height | Height% |
| 1         | 9.356  | 6367434 | 25.703 | 463826 | 34.028  |
| 2         | 10.726 | 6334748 | 25.571 | 399928 | 29.341  |
| 3         | 11.635 | 6054064 | 24.438 | 349248 | 25.622  |
| 4         | 26.568 | 6017321 | 24.289 | 150052 | 11.009  |

**Chiral HPLC spectrum of chiral 3b**

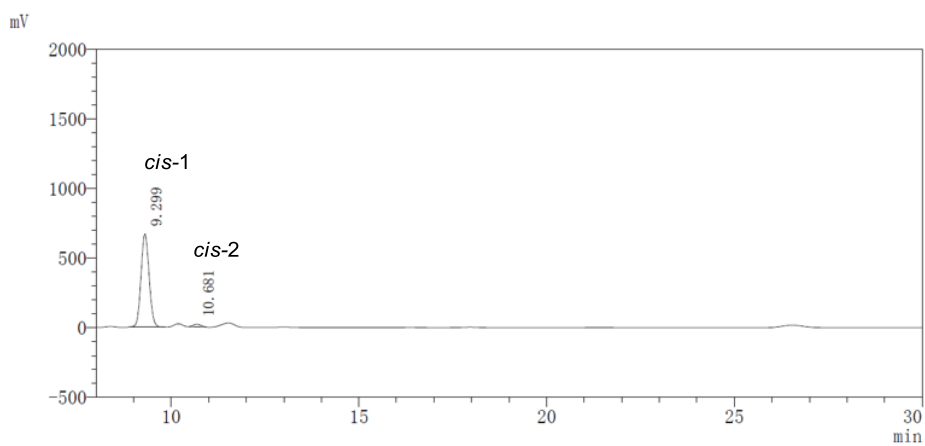

<Peak Results>

| Ch2 210nm |        |          |        |        |         |
|-----------|--------|----------|--------|--------|---------|
| Index     | Time   | Area     | Area%  | Height | Height% |
| 1         | 9.299  | 10029723 | 97.557 | 668620 | 97.372  |
| 2         | 10.681 | 251149   | 2.443  | 18048  | 2.628   |

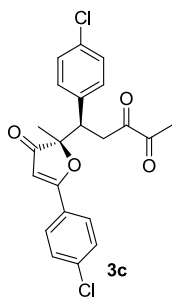

**Chiral HPLC spectrum of racemic 3c**

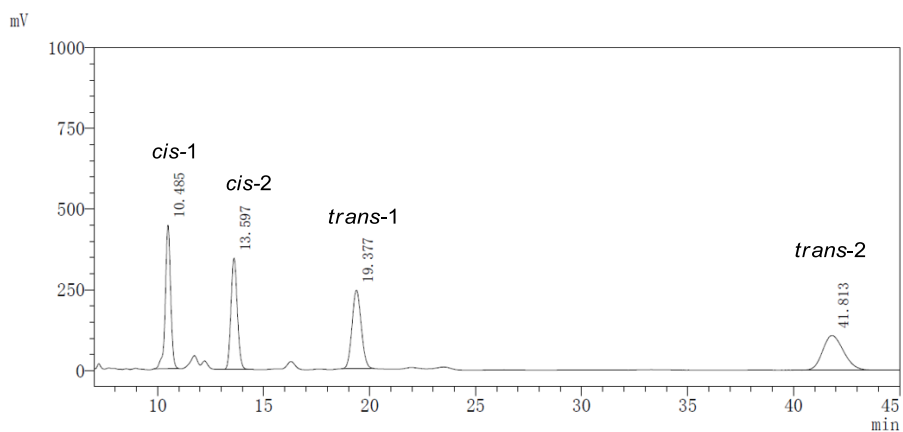

<Peak Results>

| Ch2 210nm |        |         |        |        |         |
|-----------|--------|---------|--------|--------|---------|
| Index     | Time   | Area    | Area%  | Height | Height% |
| 1         | 10.485 | 7746096 | 26.221 | 444708 | 39.064  |
| 2         | 13.597 | 7201431 | 24.378 | 343912 | 30.210  |
| 3         | 19.377 | 7323305 | 24.790 | 242811 | 21.329  |
| 4         | 41.813 | 7270277 | 24.611 | 106967 | 9.396   |

**Chiral HPLC spectrum of chiral 3c**

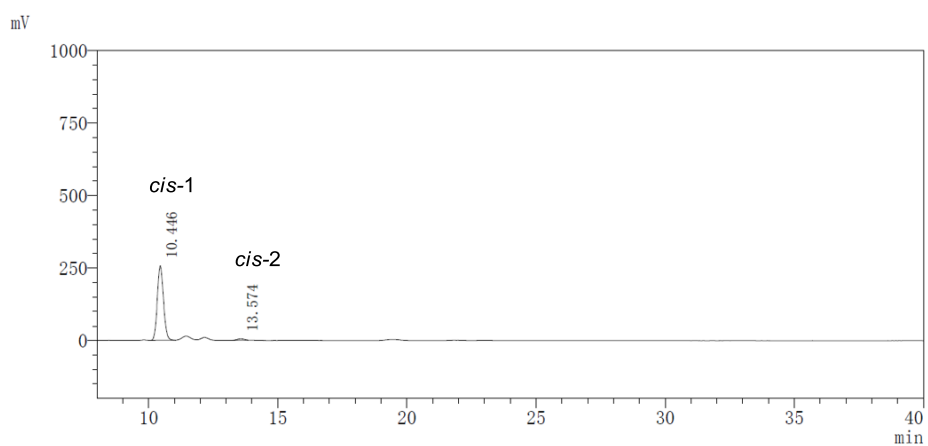

<Peak Results>

| Ch2 210nm |        |         |        |        |         |
|-----------|--------|---------|--------|--------|---------|
| Index     | Time   | Area    | Area%  | Height | Height% |
| 1         | 10.446 | 4247449 | 97.969 | 256849 | 98.159  |
| 2         | 13.574 | 88061   | 2.031  | 4817   | 1.841   |

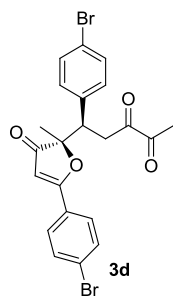

Chiral HPLC spectrum of racemic **3d**

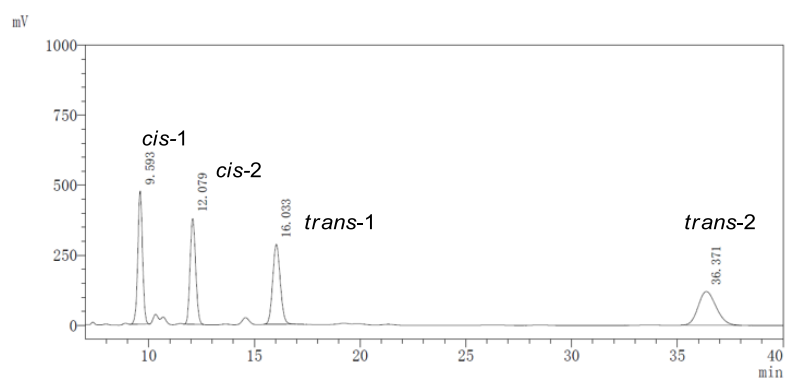

<Peak Results>  
Ch2 210nm

| Index | Time   | Area    | Area%  | Height | Height% |
|-------|--------|---------|--------|--------|---------|
| 1     | 9.593  | 7381119 | 25.934 | 475466 | 37.822  |
| 2     | 12.079 | 6938466 | 24.379 | 376738 | 29.968  |
| 3     | 16.033 | 7073087 | 24.852 | 284930 | 22.665  |
| 4     | 36.371 | 7068432 | 24.835 | 119991 | 9.545   |

Chiral HPLC spectrum of chiral **3d**

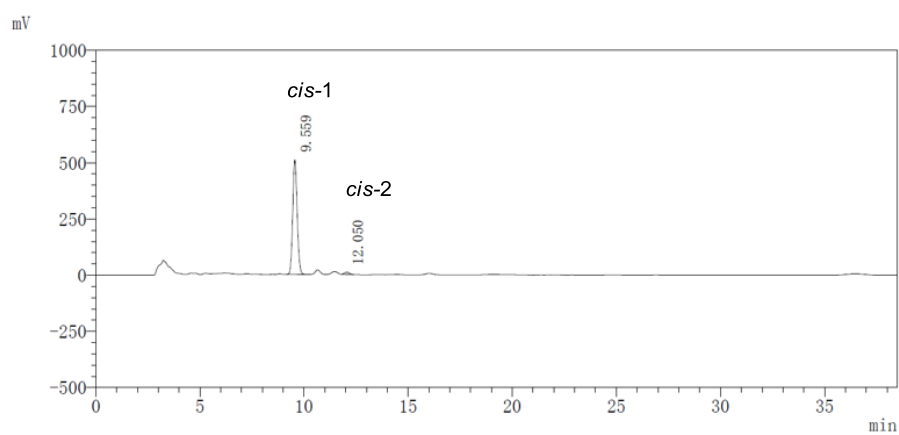

<Peak Results>  
Ch2 210nm

| Index | Time   | Area    | Area%  | Height | Height% |
|-------|--------|---------|--------|--------|---------|
| 1     | 9.559  | 7591137 | 97.904 | 508877 | 98.070  |
| 2     | 12.050 | 162530  | 2.096  | 10012  | 1.930   |

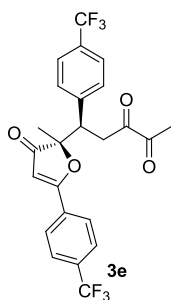

**Chiral HPLC spectrum of racemic 3e**

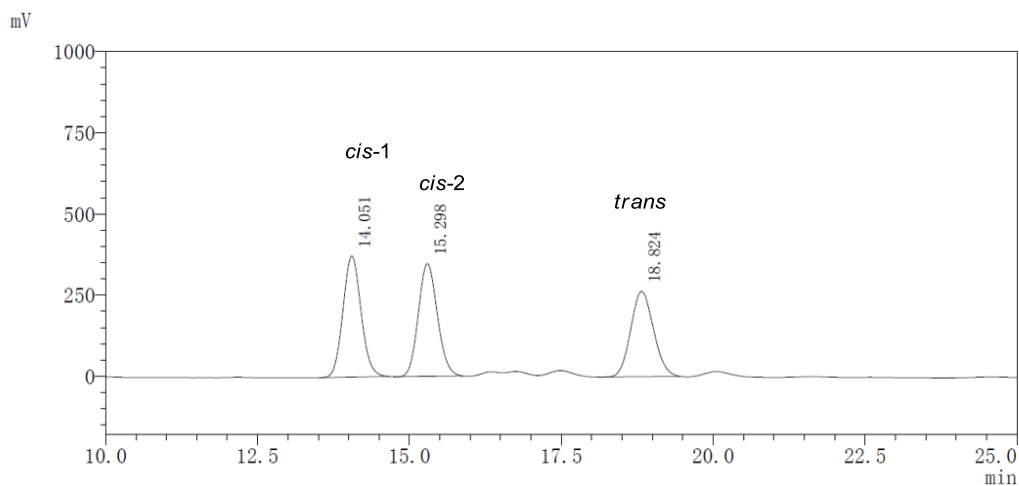

<Peak Results>

| Ch2 210nm |        |         |        |        |         |
|-----------|--------|---------|--------|--------|---------|
| Index     | Time   | Area    | Area%  | Height | Height% |
| 1         | 14.051 | 7759852 | 34.983 | 373636 | 37.973  |
| 2         | 15.298 | 7587269 | 34.205 | 347244 | 35.291  |
| 3         | 18.824 | 6834636 | 30.812 | 263067 | 26.736  |

**Chiral HPLC spectrum of chiral 3e**

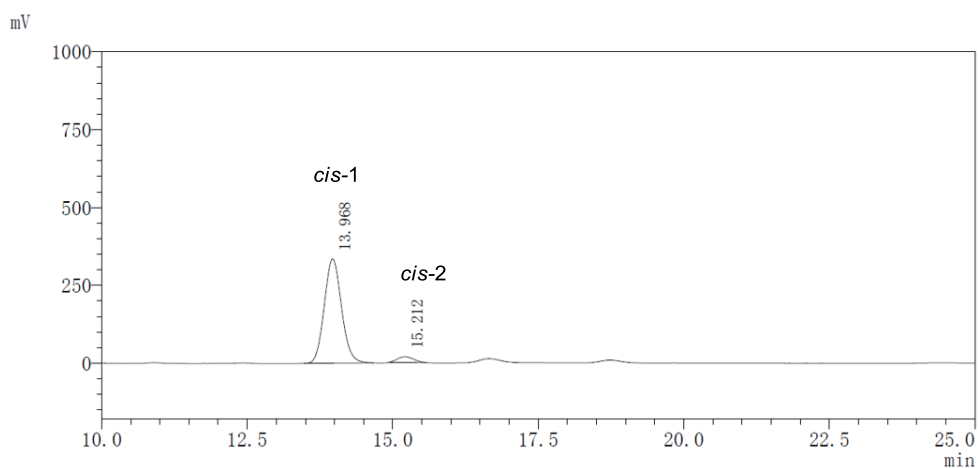

<Peak Results>

| Ch2 210nm |        |         |        |        |         |
|-----------|--------|---------|--------|--------|---------|
| Index     | Time   | Area    | Area%  | Height | Height% |
| 1         | 13.968 | 6906835 | 95.030 | 334924 | 94.730  |
| 2         | 15.212 | 361236  | 4.970  | 18633  | 5.270   |

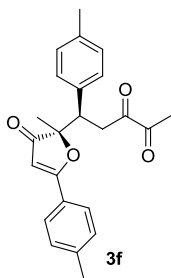

Chiral HPLC spectrum of racemic **3f**

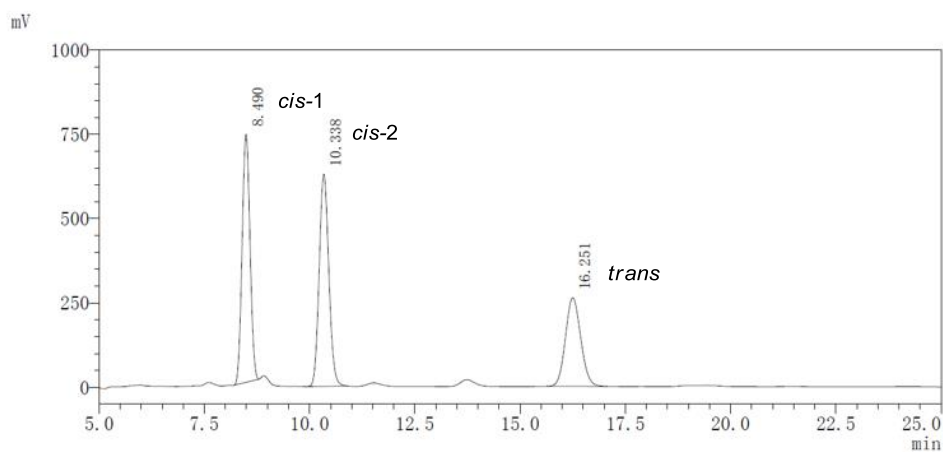

<Peak Results>

Ch2 210nm

| Index | Time   | Area     | Area%  | Height | Height% |
|-------|--------|----------|--------|--------|---------|
| 1     | 8.490  | 9592665  | 36.585 | 734949 | 45.177  |
| 2     | 10.338 | 10000330 | 38.140 | 629060 | 38.668  |
| 3     | 16.251 | 6627392  | 25.276 | 262813 | 16.155  |

Chiral HPLC spectrum of chiral **3f**

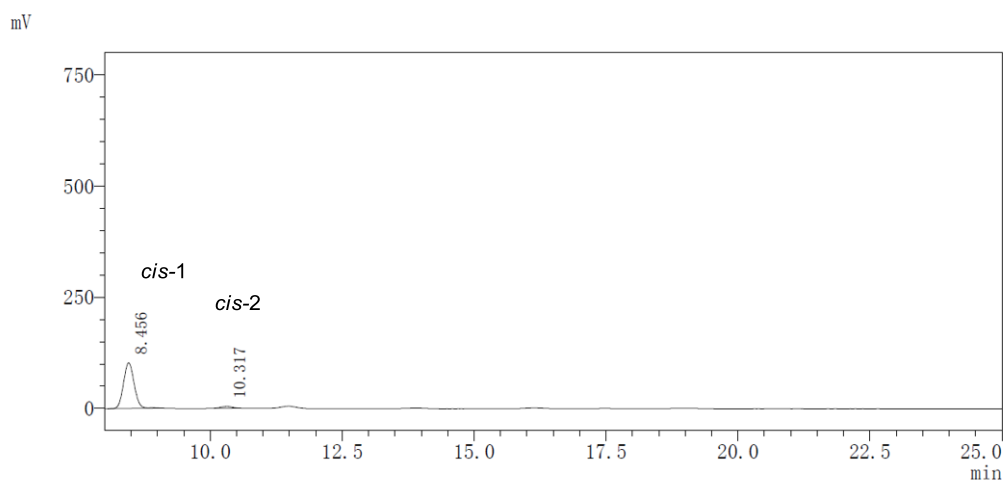

<Peak Results>

Ch2 210nm

| Index | Time   | Area    | Area%  | Height | Height% |
|-------|--------|---------|--------|--------|---------|
| 1     | 8.456  | 1435251 | 97.952 | 102615 | 96.192  |
| 2     | 10.317 | 60554   | 2.048  | 4063   | 3.808   |

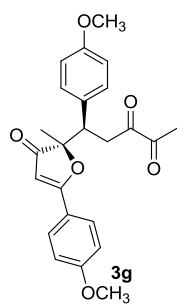

**Chiral HPLC spectrum of racemic 3g**

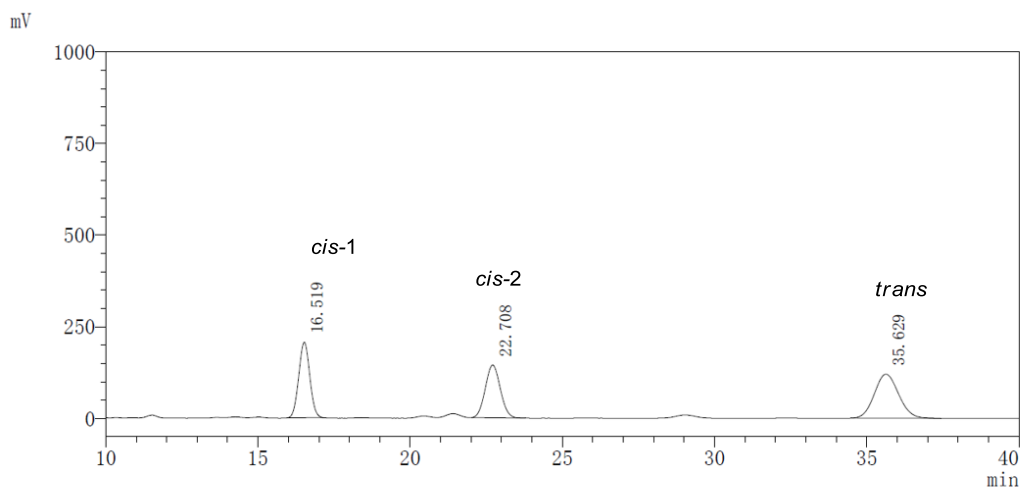

<Peak Results>

| Ch2 210nm |        |         |        |        |         |
|-----------|--------|---------|--------|--------|---------|
| Index     | Time   | Area    | Area%  | Height | Height% |
| 1         | 16.519 | 5186216 | 30.911 | 205866 | 43.792  |
| 2         | 22.708 | 4945989 | 29.479 | 143876 | 30.606  |
| 3         | 35.629 | 6645726 | 39.610 | 120356 | 25.602  |

**Chiral HPLC spectrum of chiral 3g**

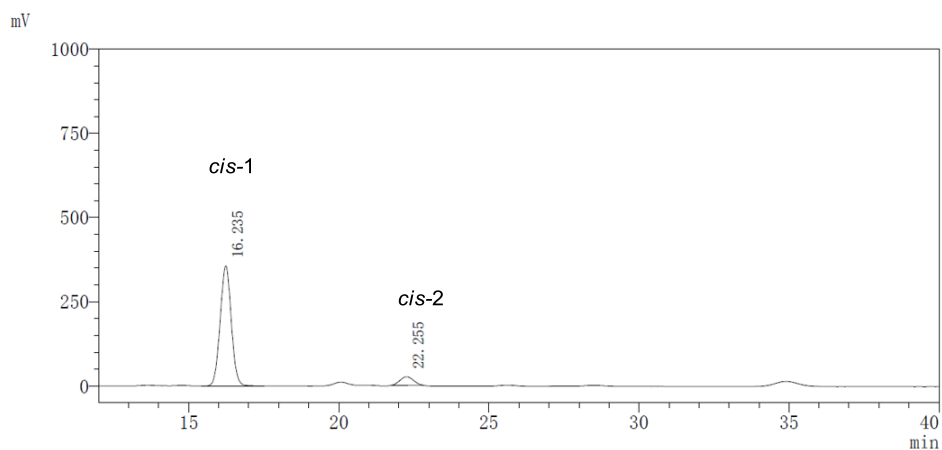

<Peak Results>

| Ch2 210nm |        |         |        |        |         |
|-----------|--------|---------|--------|--------|---------|
| Index     | Times  | Area    | Area%  | Height | Height% |
| 1         | 16.235 | 9166941 | 91.995 | 356267 | 93.298  |
| 2         | 22.255 | 797660  | 8.005  | 25593  | 6.702   |

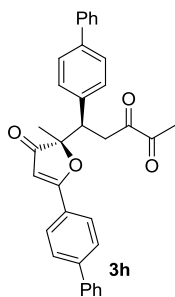

**Chiral HPLC spectrum of racemic 3h**

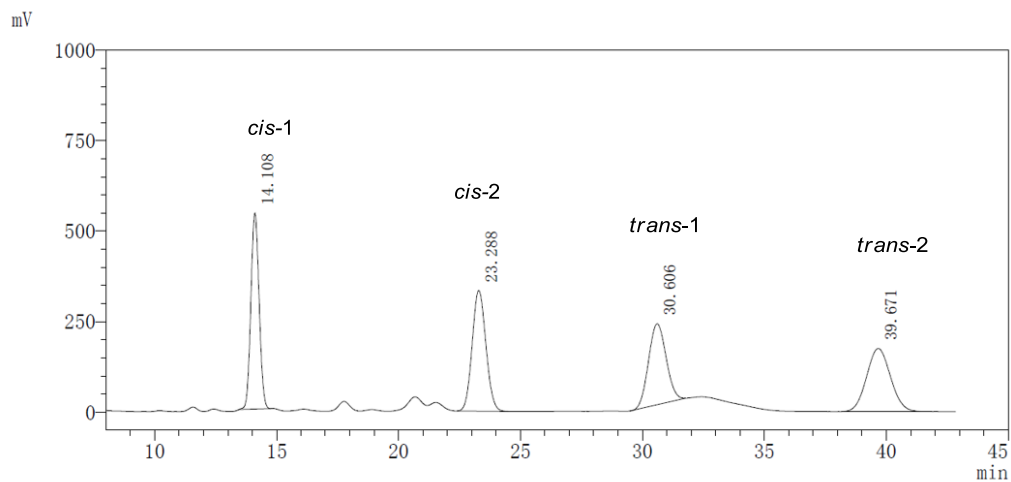

<Peak Results>

| Ch2 210nm |        |          |        |        |         |
|-----------|--------|----------|--------|--------|---------|
| Index     | Time   | Area     | Area%  | Height | Height% |
| 1         | 14.108 | 12713579 | 26.009 | 541701 | 42.546  |
| 2         | 23.288 | 13079870 | 26.758 | 333574 | 26.200  |
| 3         | 30.606 | 11216319 | 22.946 | 223599 | 17.562  |
| 4         | 39.671 | 11872278 | 24.288 | 174326 | 13.692  |

**Chiral HPLC spectrum of chiral 3h**

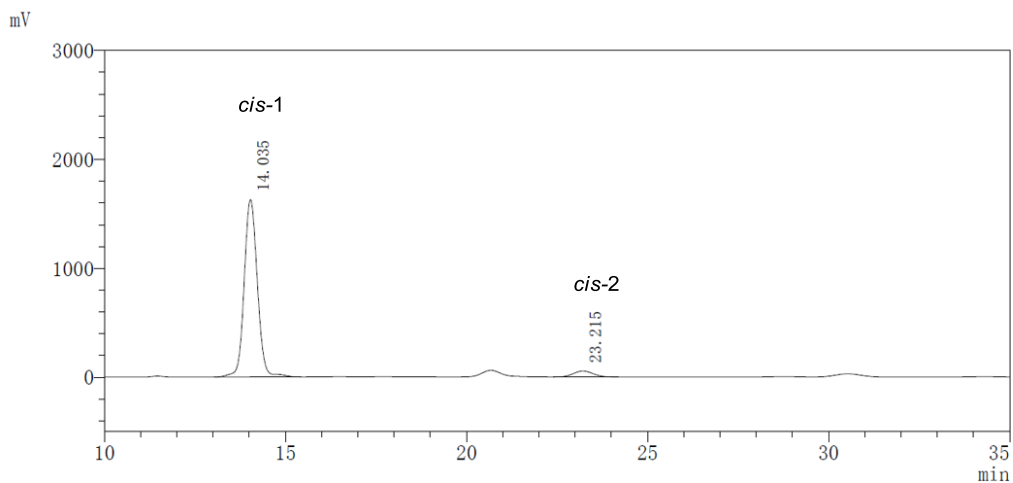

<Peak Results>

| Ch2 210nm |        |          |        |         |         |
|-----------|--------|----------|--------|---------|---------|
| Index     | Time   | Area     | Area%  | Height  | Height% |
| 1         | 14.035 | 41200571 | 95.791 | 1628939 | 96.760  |
| 2         | 23.215 | 2081516  | 4.209  | 54541   | 3.240   |



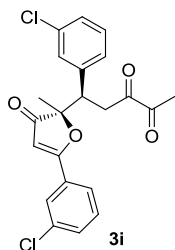

**Chiral HPLC spectrum of racemic 3i**

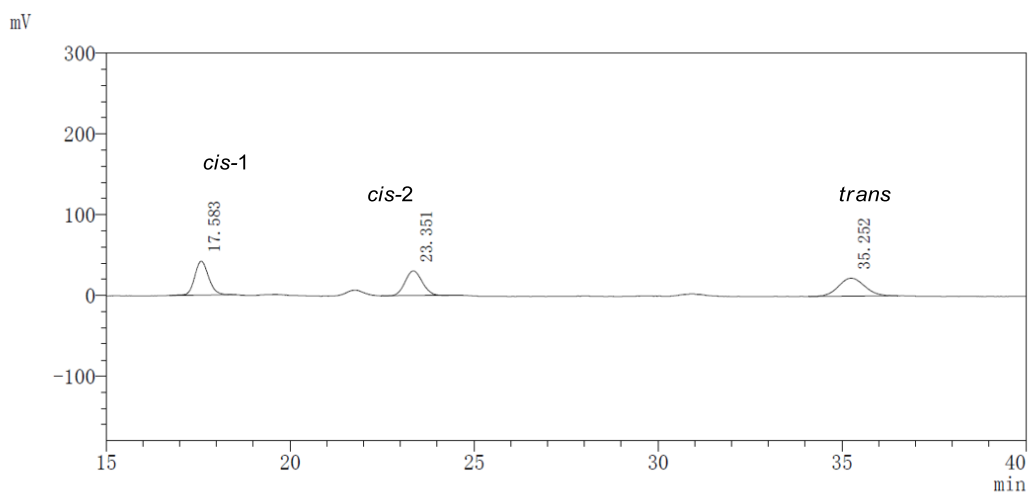

<Peak Results>

| Ch2 210nm |        |         |        |        |         |
|-----------|--------|---------|--------|--------|---------|
| Index     | Time   | Area    | Area%  | Height | Height% |
| 1         | 17.583 | 1110164 | 34.751 | 41969  | 44.237  |
| 2         | 23.351 | 988345  | 30.938 | 30663  | 32.320  |
| 3         | 35.252 | 1096086 | 34.311 | 22241  | 23.443  |

**Chiral HPLC spectrum of chiral 3i**

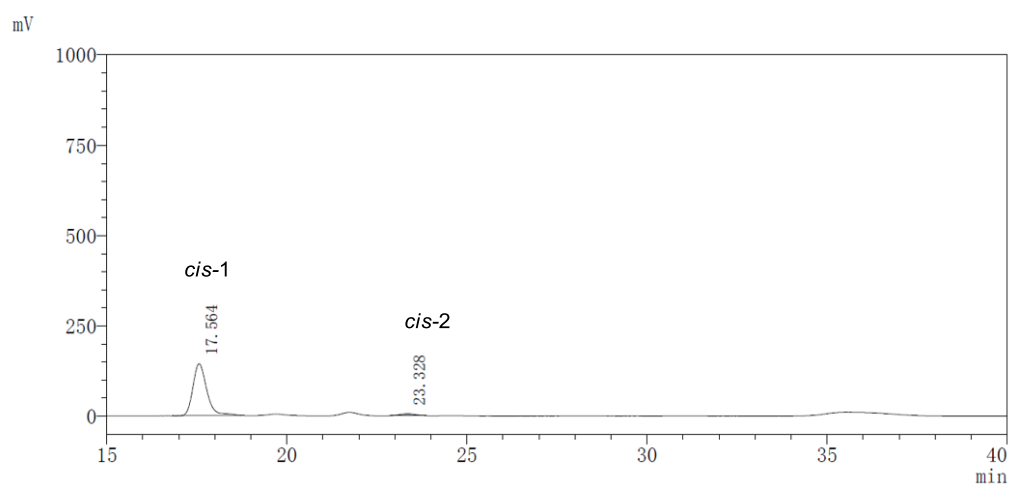

<Peak Results>

| Ch2 210nm |        |         |        |        |         |
|-----------|--------|---------|--------|--------|---------|
| Index     | Time   | Area    | Area%  | Height | Height% |
| 1         | 17.564 | 3862985 | 95.691 | 143823 | 96.160  |
| 2         | 23.328 | 173943  | 4.309  | 5744   | 3.840   |

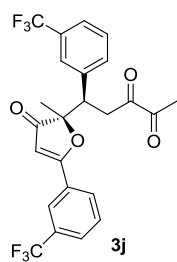

**Chiral HPLC spectrum of racemic 3j**

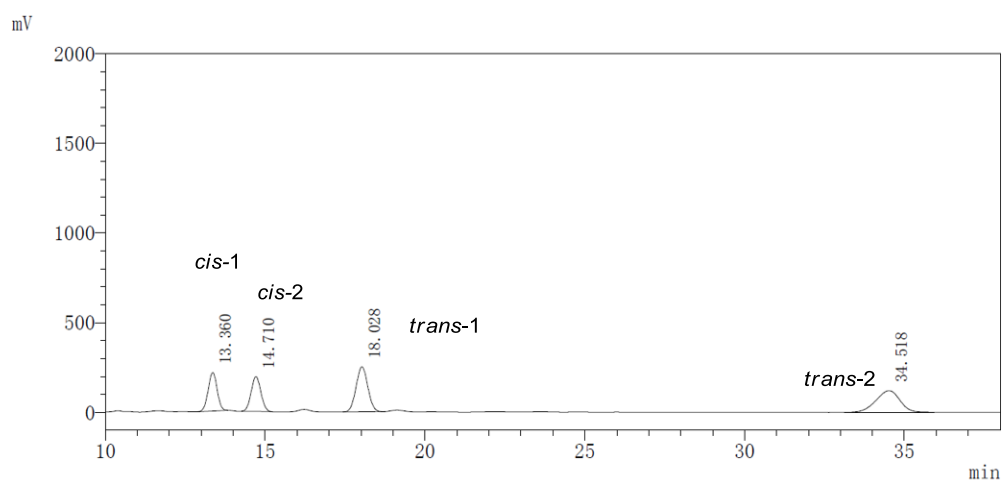

<Peak Results>

| Ch2 210nm |        |         |        |        |         |
|-----------|--------|---------|--------|--------|---------|
| Index     | Time   | Area    | Area%  | Height | Height% |
| 1         | 13.360 | 4179307 | 19.925 | 214405 | 27.497  |
| 2         | 14.710 | 4100207 | 19.548 | 193608 | 24.830  |
| 3         | 18.028 | 6418067 | 30.598 | 251040 | 32.195  |
| 4         | 34.518 | 6278009 | 29.930 | 120693 | 15.479  |

**Chiral HPLC spectrum of chiral 3j**

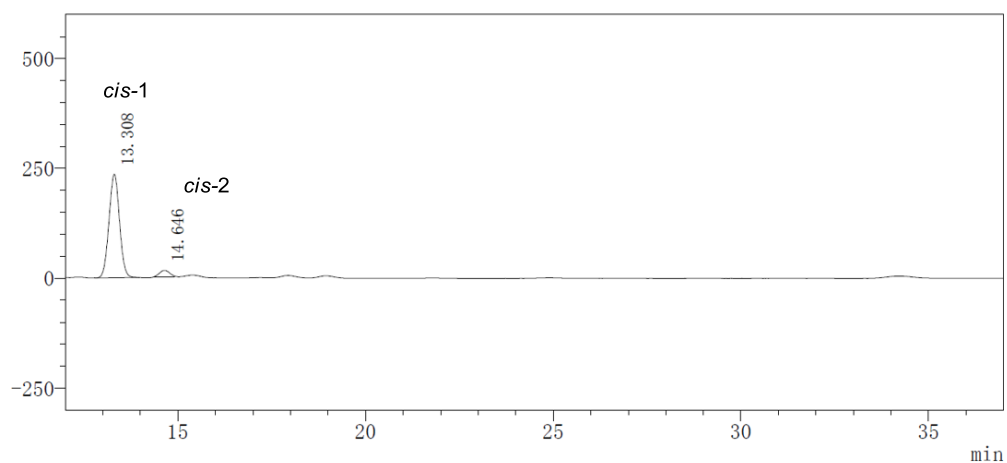

<Peak Results>

| Ch2 210nm |        |         |        |        |         |
|-----------|--------|---------|--------|--------|---------|
| Index     | Time   | Area    | Area%  | Height | Height% |
| 1         | 13.308 | 4602469 | 95.215 | 235837 | 94.603  |
| 2         | 14.646 | 231276  | 4.785  | 13454  | 5.397   |

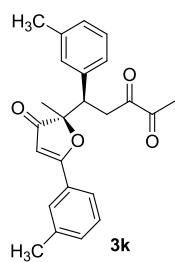

**Chiral HPLC spectrum of racemic *3k***

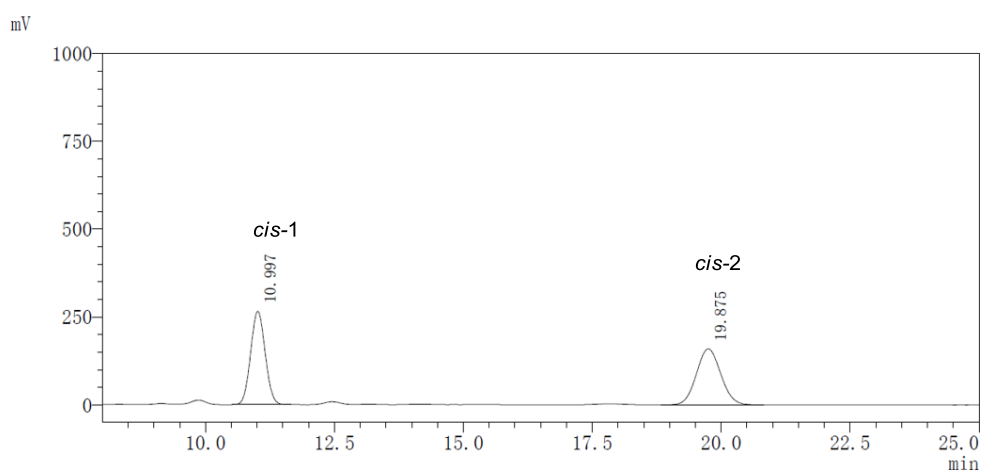

<Peak Results>

| Ch2 210nm |        |         |        |        |         |
|-----------|--------|---------|--------|--------|---------|
| Index     | Time   | Area    | Area%  | Height | Height% |
| 1         | 10.997 | 7261293 | 49.281 | 192812 | 56.272  |
| 2         | 19.875 | 7392891 | 50.719 | 121293 | 43.728  |

**Chiral HPLC spectrum of chiral *3k***

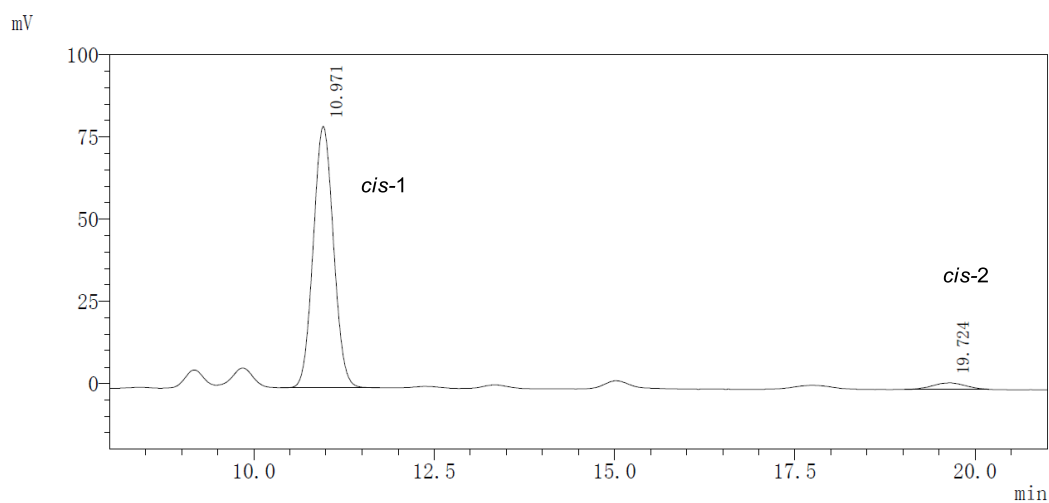

<Peak Results>

| Ch2 210nm |        |         |        |        |         |
|-----------|--------|---------|--------|--------|---------|
| Index     | Time   | Area    | Area%  | Height | Height% |
| 1         | 10.971 | 1671293 | 95.368 | 62992  | 97.722  |
| 2         | 19.724 | 72182   | 4.632  | 1762   | 2.278   |

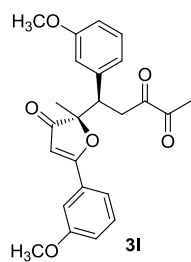

**Chiral HPLC spectrum of racemic 3I**

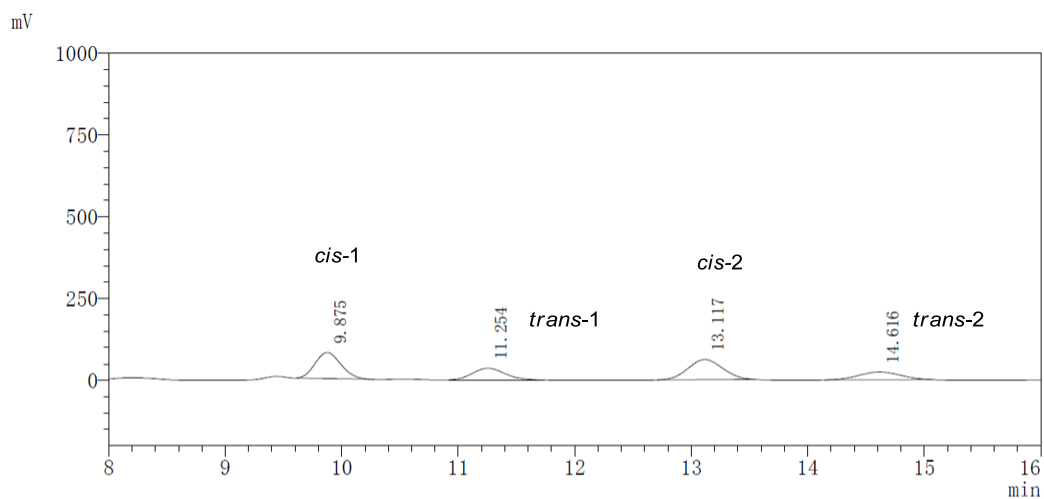

<Peak Results>

| Ch2 210nm |        |         |        |        |         |
|-----------|--------|---------|--------|--------|---------|
| Index     | Time   | Area    | Area%  | Height | Height% |
| 1         | 9.875  | 1222366 | 32.312 | 79575  | 39.671  |
| 2         | 11.254 | 689699  | 18.232 | 35706  | 17.801  |
| 3         | 13.117 | 1272434 | 33.636 | 61518  | 30.669  |
| 4         | 14.616 | 598470  | 15.820 | 23788  | 11.859  |

**Chiral HPLC spectrum of chiral 3I**

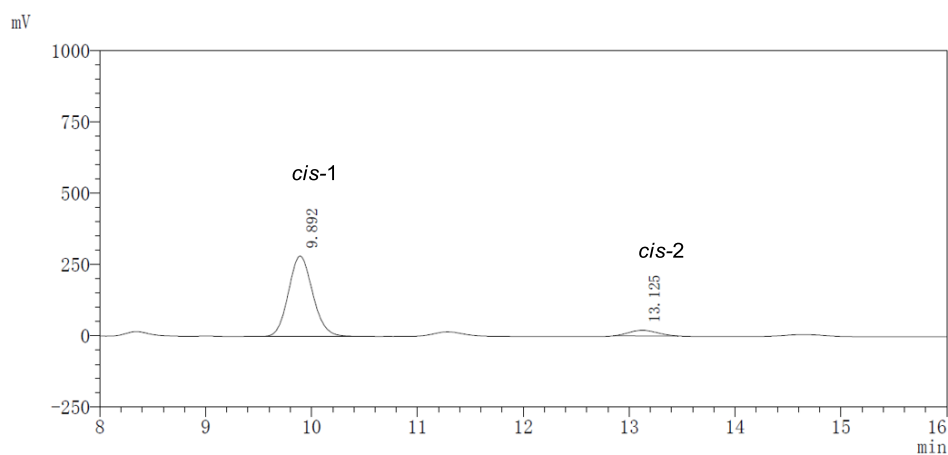

<Peak Results>

| Ch2 210nm |        |         |        |        |         |
|-----------|--------|---------|--------|--------|---------|
| Index     | Time   | Area    | Area%  | Height | Height% |
| 1         | 9.892  | 4468641 | 92.510 | 281526 | 93.522  |
| 2         | 13.125 | 361800  | 7.490  | 19501  | 6.478   |

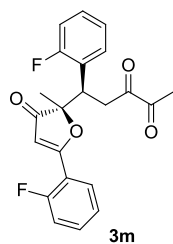

**Chiral HPLC spectrum of racemic 3m**

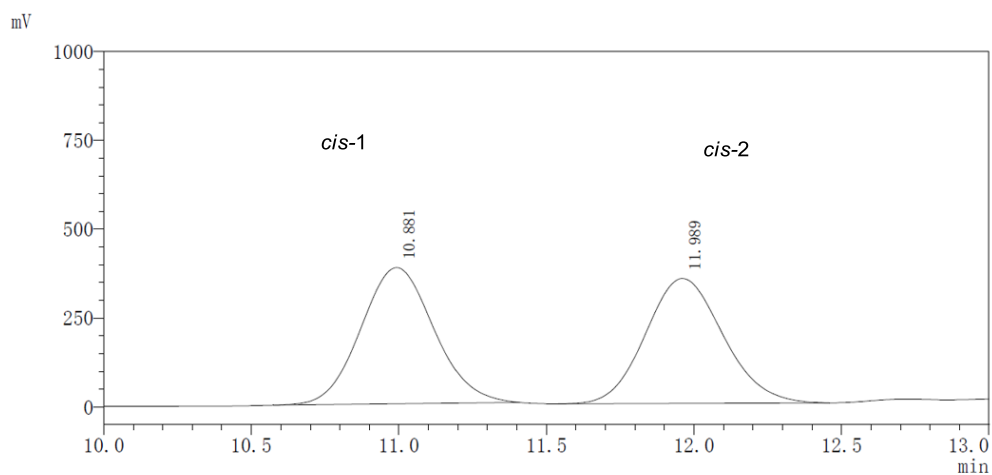

<Peak Results>

| Ch2 210nm |        |         |        |        |         |
|-----------|--------|---------|--------|--------|---------|
| Index     | Time   | Area    | Area%  | Height | Height% |
| 1         | 10.881 | 6809127 | 50.251 | 446765 | 52.328  |
| 2         | 11.989 | 6436972 | 49.749 | 451721 | 47.672  |

**Chiral HPLC spectrum of chiral 3m**

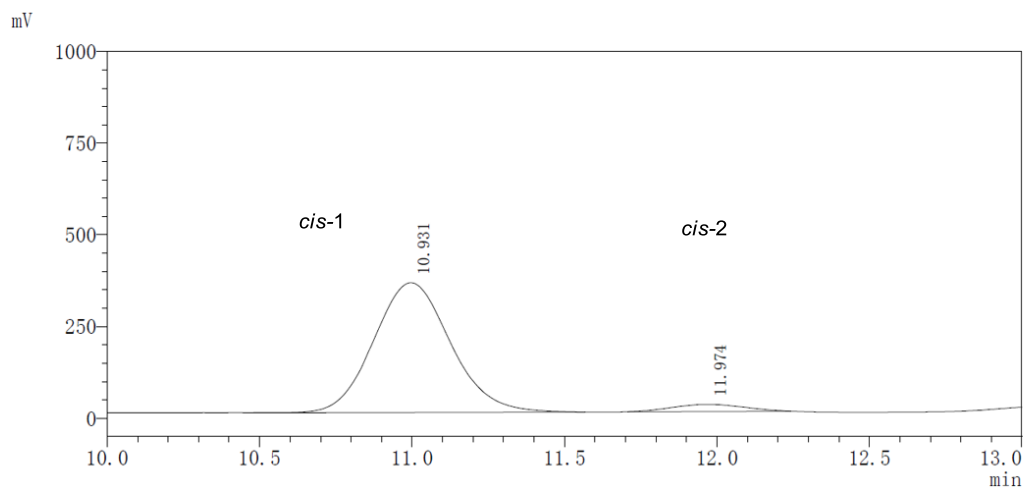

<Peak Results>

| Ch2 210nm |        |         |        |        |         |
|-----------|--------|---------|--------|--------|---------|
| Index     | Time   | Area    | Area%  | Height | Height% |
| 1         | 10.931 | 7219283 | 95.741 | 353500 | 97.758  |
| 2         | 11.974 | 428712  | 4.259  | 19482  | 2.242   |

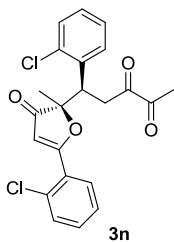

**Chiral HPLC spectrum of racemic 3n**

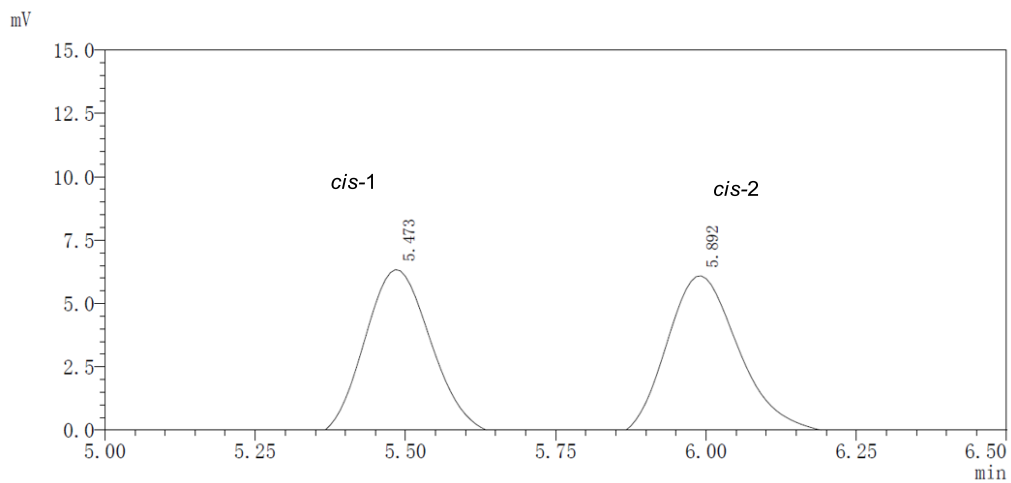

<Peak Results>

| Ch2 210nm |       |       |        |        |         |
|-----------|-------|-------|--------|--------|---------|
| Index     | Time  | Area  | Area%  | Height | Height% |
| 1         | 5.473 | 55499 | 49.874 | 6192   | 51.441  |
| 2         | 5.892 | 57232 | 50.126 | 6216   | 48.559  |

**Chiral HPLC spectrum of chiral 3n**

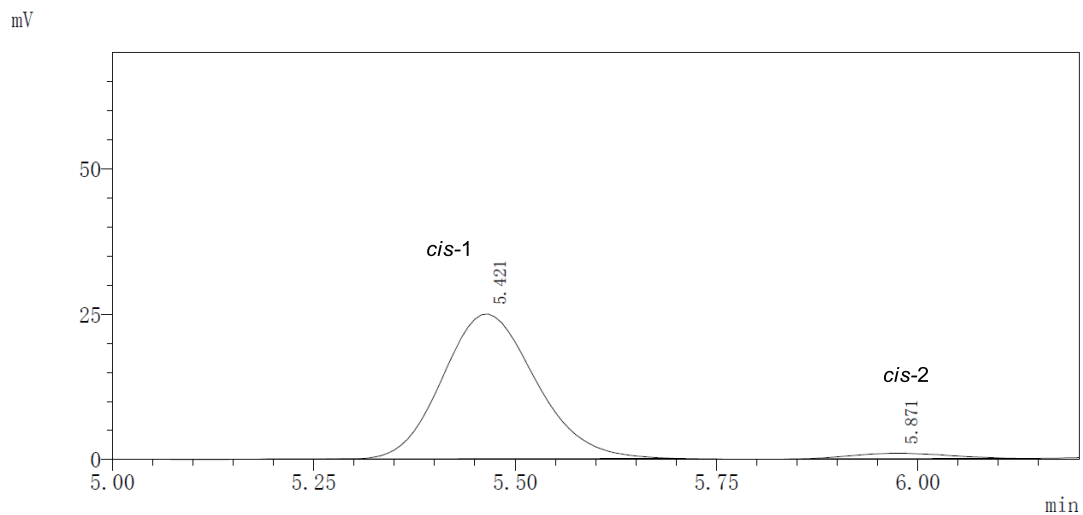

<Peak Results>

| Ch2 210nm |       |        |        |        |         |
|-----------|-------|--------|--------|--------|---------|
| Index     | Time  | Area   | Area%  | Height | Height% |
| 1         | 5.421 | 343257 | 95.185 | 23406  | 97.553  |
| 2         | 5.871 | 5215   | 4.815  | 694    | 2.447   |

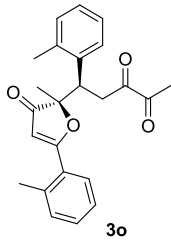

**Chiral HPLC spectrum of racemic 3o**

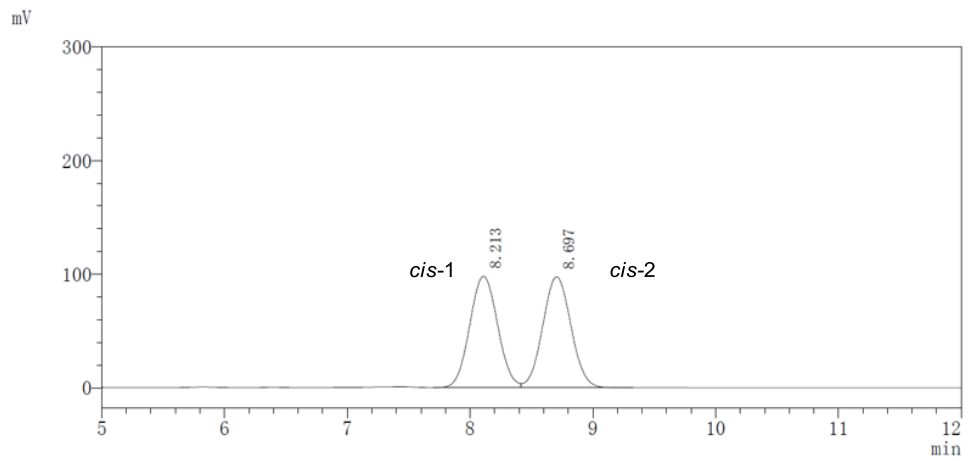

<Peak Results>

| Ch2 210nm |       |         |        |        |         |
|-----------|-------|---------|--------|--------|---------|
| Index     | Time  | Area    | Area%  | Height | Height% |
| 1         | 8.213 | 1466283 | 49.818 | 97157  | 50.315  |
| 2         | 8.697 | 1443887 | 50.182 | 97254  | 49.685  |

**Chiral HPLC spectrum of chiral 3o**

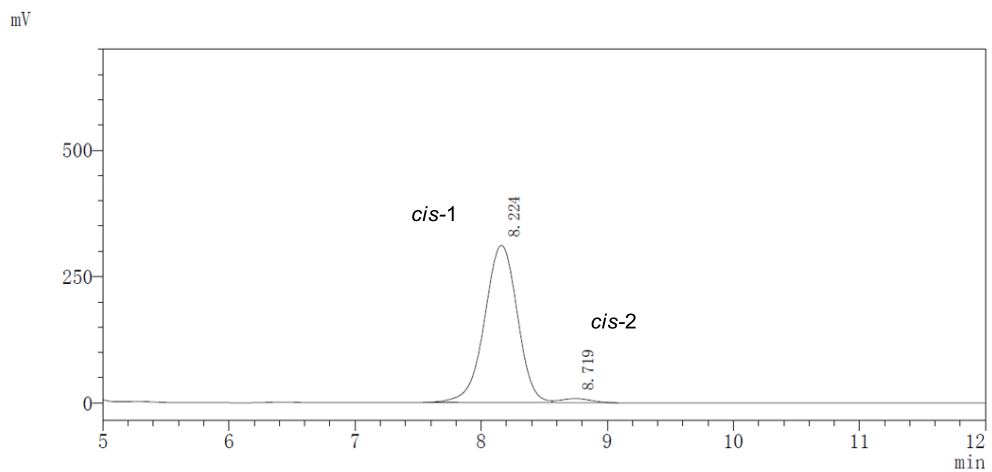

<Peak Results>

| Ch2 210nm |       |         |        |        |         |
|-----------|-------|---------|--------|--------|---------|
| Index     | Time  | Area    | Area%  | Height | Height% |
| 1         | 8.224 | 5667149 | 95.643 | 31384  | 97.207  |
| 2         | 8.719 | 326252  | 4.357  | 9011   | 2.793   |

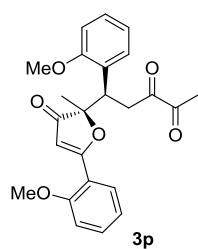

**Chiral HPLC spectrum of racemic 3p**

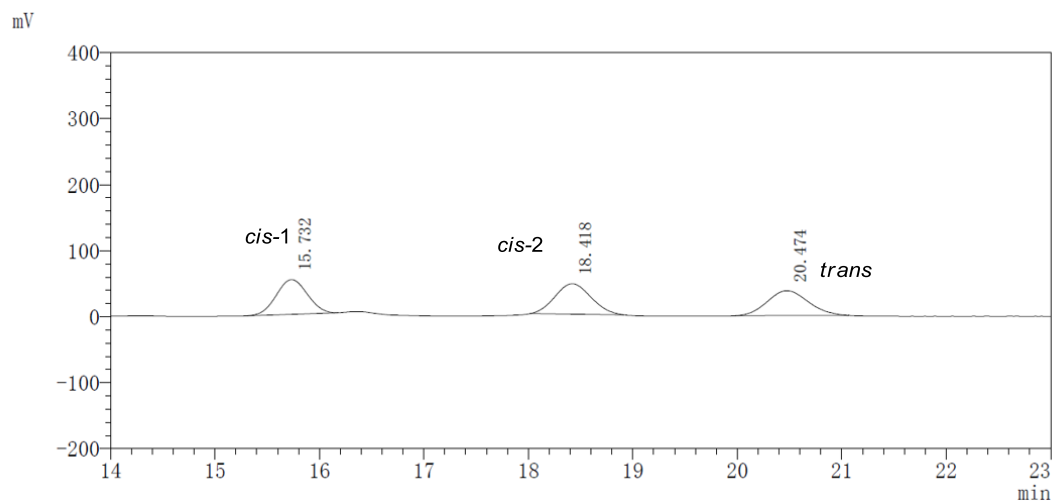

<Peak Results>

| Ch2 210nm |        |         |        |        |         |
|-----------|--------|---------|--------|--------|---------|
| Index     | Time   | Area    | Area%  | Height | Height% |
| 1         | 15.732 | 1087537 | 33.717 | 52693  | 38.609  |
| 2         | 18.418 | 1107135 | 34.325 | 46101  | 33.779  |
| 3         | 20.474 | 1030790 | 31.958 | 37684  | 27.612  |

**Chiral HPLC spectrum of chiral 3p**

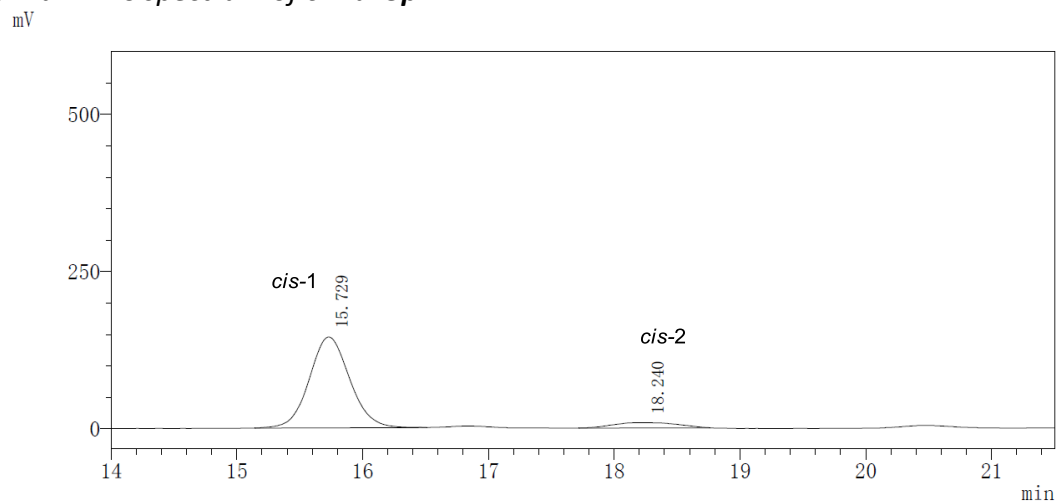

<Peak Results>

| Ch2 210nm |        |         |        |        |         |
|-----------|--------|---------|--------|--------|---------|
| Index     | Time   | Area    | Area%  | Height | Height% |
| 1         | 15.729 | 3226528 | 91.521 | 144442 | 94.390  |
| 2         | 18.240 | 298911  | 8.479  | 8585   | 5.610   |



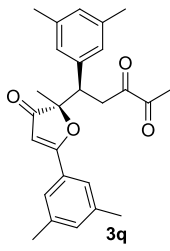

Chiral HPLC spectrum of racemic **3q**

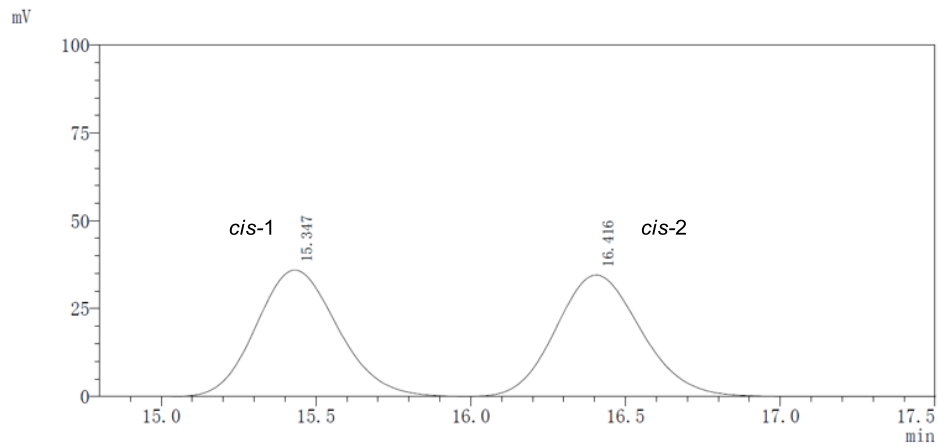

<Peak Results>

Ch2 210nm

| Index | Time   | Area   | Area%  | Height | Height% |
|-------|--------|--------|--------|--------|---------|
| 1     | 15.347 | 667524 | 49.548 | 32356  | 51.154  |
| 2     | 16.416 | 683831 | 50.452 | 34447  | 48.846  |

Chiral HPLC spectrum of chiral **3q**

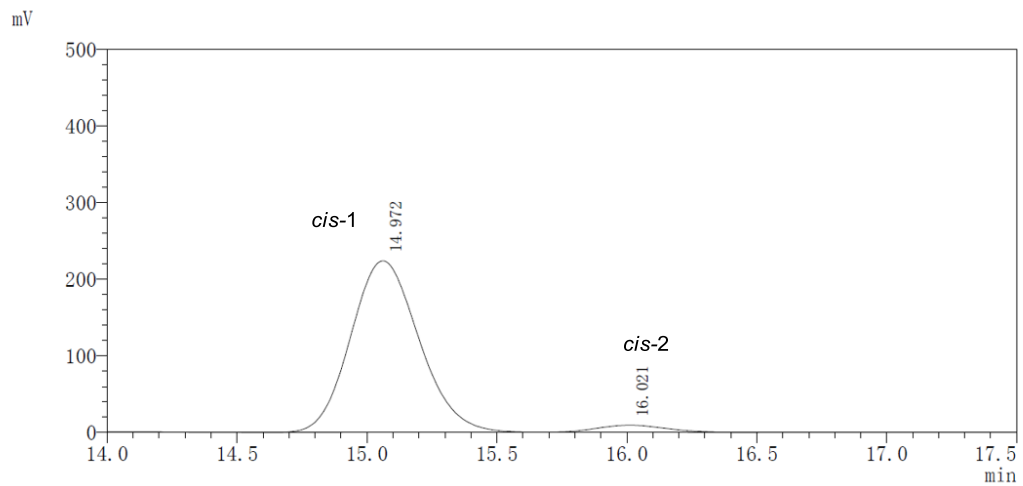

<Peak Results>

Ch2 210nm

| Index | Time   | Area    | Area%  | Height | Height% |
|-------|--------|---------|--------|--------|---------|
| 1     | 14.972 | 4056211 | 96.227 | 512062 | 97.348  |
| 2     | 16.021 | 265927  | 3.773  | 9761   | 2.652   |

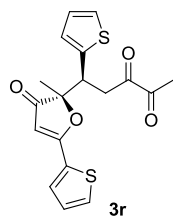

**Chiral HPLC spectrum of racemic 3r**

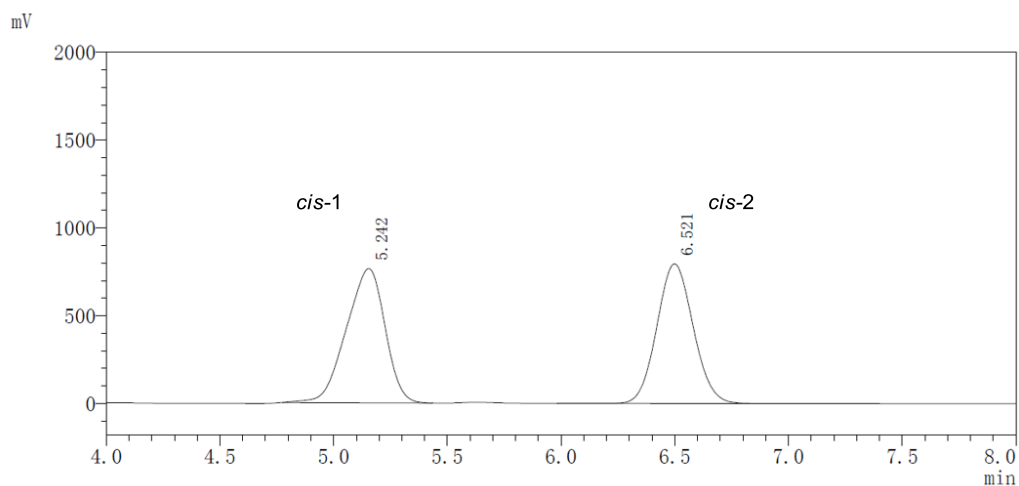

<Peak Results>

| Ch2 210nm |       |         |        |        |          |
|-----------|-------|---------|--------|--------|----------|
| Index     | Time  | Area    | Area/% | Height | Height/% |
| 1         | 5.242 | 8982132 | 50.261 | 621321 | 49.721   |
| 2         | 6.521 | 8827326 | 49.739 | 638734 | 50.279   |

**Chiral HPLC spectrum of chiral 3r**

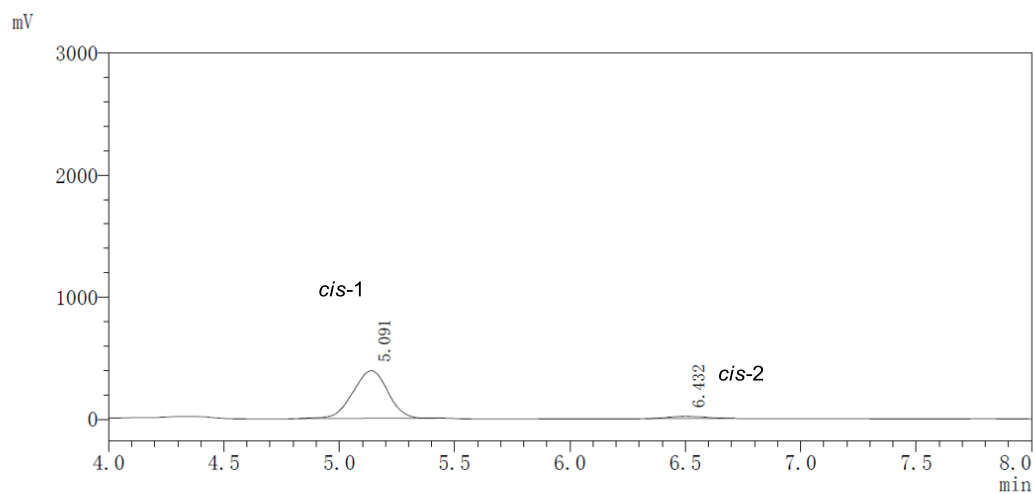

<Peak Results>

| Ch2 210nm |       |         |        |        |         |
|-----------|-------|---------|--------|--------|---------|
| Index     | Time  | Area    | Area%  | Height | Height% |
| 1         | 5.091 | 3292812 | 95.231 | 389744 | 95.662  |
| 2         | 6.432 | 219239  | 4.769  | 17674  | 4.338   |



**Chiral HPLC spectrum of racemic 3s**

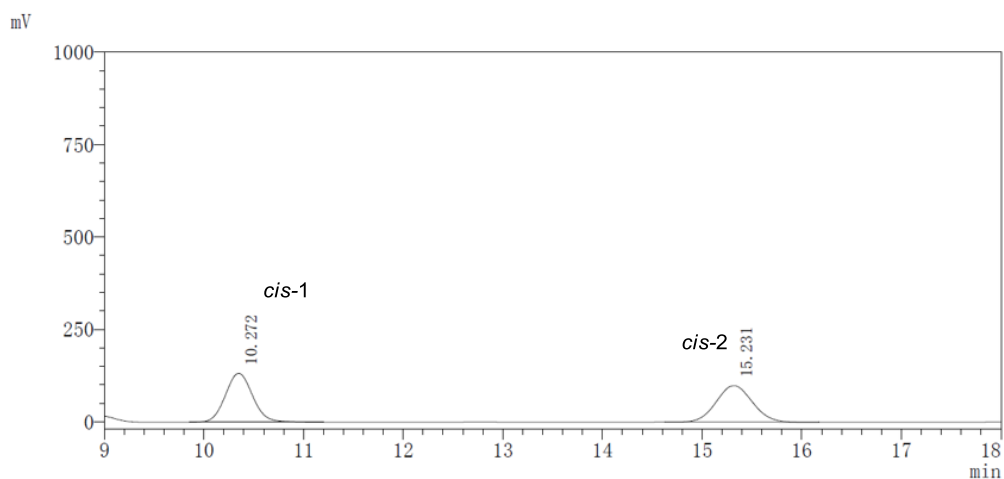

<Peak Results>

| Ch2 210nm |        |         |        |        |         |
|-----------|--------|---------|--------|--------|---------|
| Index     | Time   | Area    | Area%  | Height | Height% |
| 1         | 10.272 | 2513053 | 50.245 | 133183 | 55.212  |
| 2         | 15.231 | 2491873 | 49.755 | 94857  | 44.788  |

**Chiral HPLC spectrum of chiral 3s**

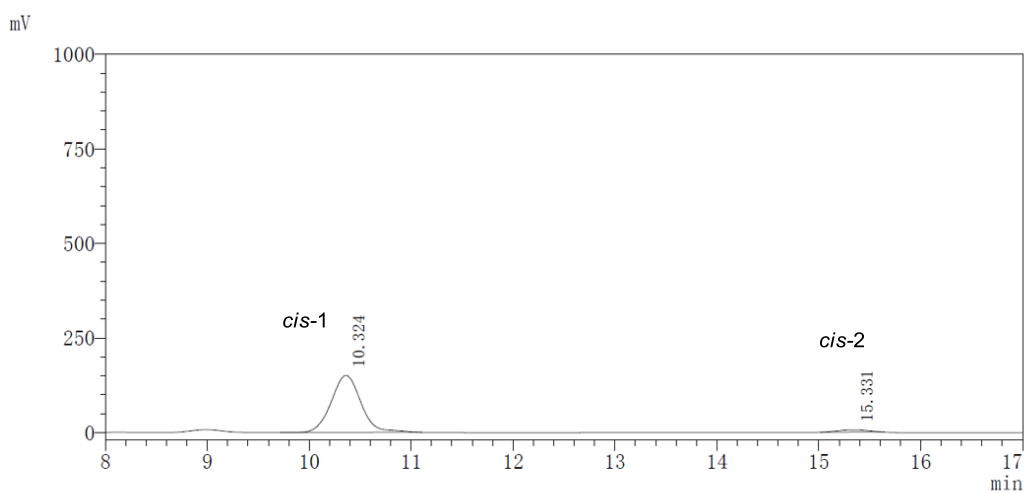

<Peak Results>

| Ch2 210nm |        |         |        |        |         |
|-----------|--------|---------|--------|--------|---------|
| Index     | Time   | Area    | Area%  | Height | Height% |
| 1         | 10.324 | 3058608 | 95.058 | 159613 | 96.095  |
| 2         | 15.331 | 145161  | 4.942  | 6523   | 3.905   |

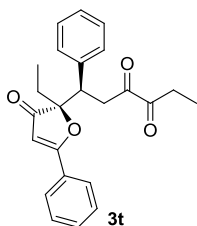

**Chiral HPLC spectrum of racemic 3t**

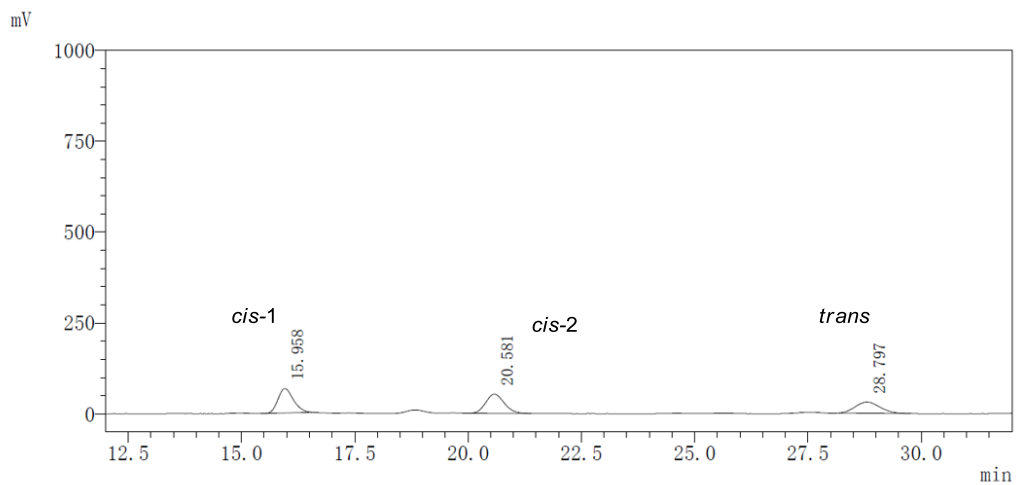

<Peak Results>

| Ch2 210nm |        |         |        |        |         |
|-----------|--------|---------|--------|--------|---------|
| Index     | Time   | Area    | Area%  | Height | Height% |
| 1         | 15.958 | 1590569 | 37.349 | 67227  | 44.584  |
| 2         | 20.581 | 1495843 | 35.125 | 52802  | 35.018  |
| 3         | 28.797 | 1172238 | 27.526 | 30757  | 20.398  |

**Chiral HPLC spectrum of chiral 3t**

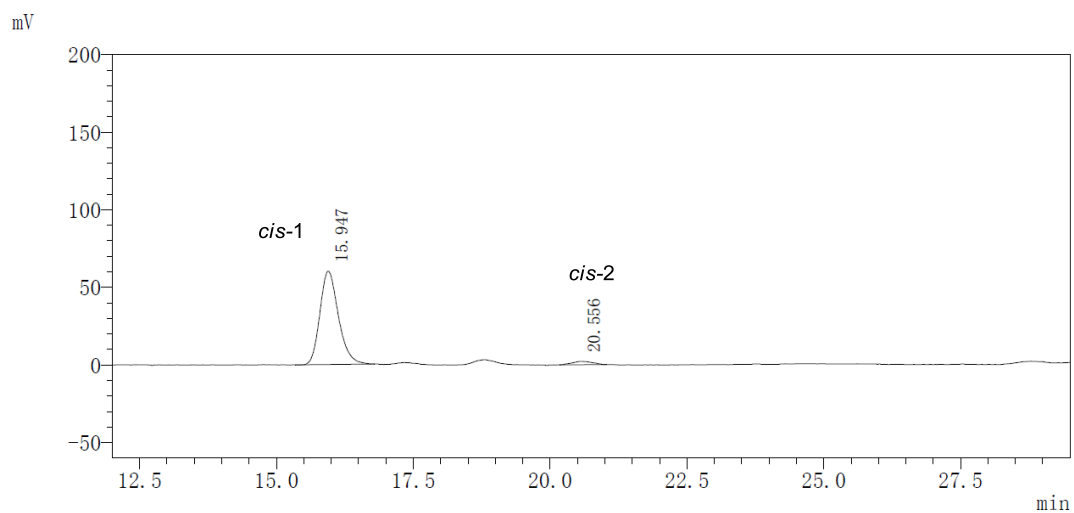

<Peak Results>

| Ch2 210nm |        |         |        |        |         |
|-----------|--------|---------|--------|--------|---------|
| Index     | Time   | Area    | Area%  | Height | Height% |
| 1         | 15.947 | 1417610 | 96.271 | 60218  | 96.538  |
| 2         | 20.556 | 54905   | 3.729  | 2159   | 3.462   |

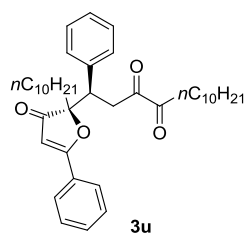

**Chiral HPLC spectrum of racemic 3u**

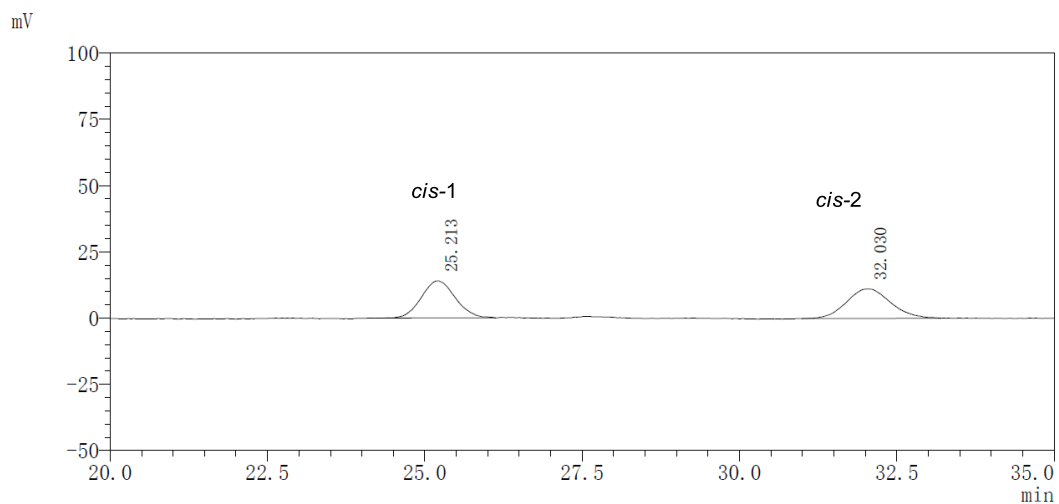

<Peak Results>

| Ch2 210nm |        |        |        |        |         |
|-----------|--------|--------|--------|--------|---------|
| Index     | Time   | Area   | Area%  | Height | Height% |
| 1         | 25.213 | 524324 | 49.358 | 14007  | 55.759  |
| 2         | 32.030 | 537958 | 50.642 | 11114  | 44.241  |

**Chiral HPLC spectrum of chiral 3u**

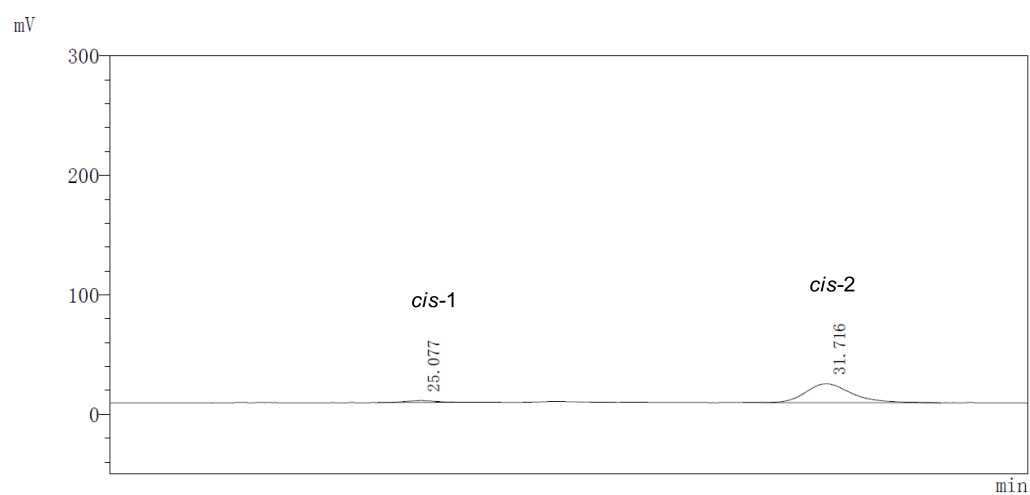

<Peak Results>

| Ch2 210nm |        |        |        |        |         |
|-----------|--------|--------|--------|--------|---------|
| Index     | Time   | Area   | Area%  | Height | Height% |
| 1         | 25.077 | 52298  | 6.005  | 1560   | 8.983   |
| 2         | 31.716 | 818682 | 93.995 | 15805  | 91.017  |

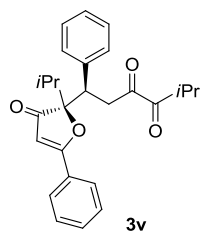

**Chiral HPLC spectrum of racemic 3u**

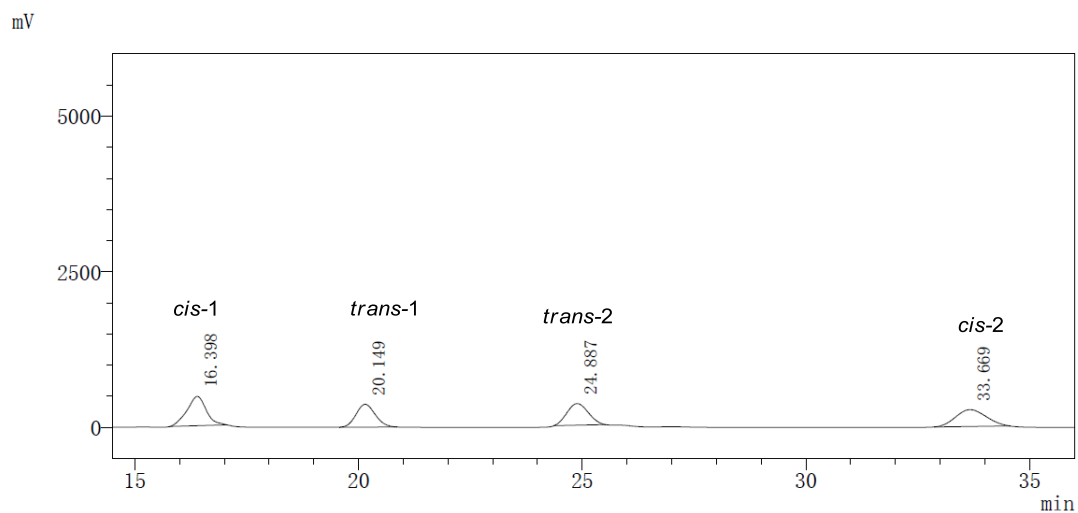

<Peak Results>

Ch2 254nm

| Index | Time   | Area     | Area%  | Height | Height% |
|-------|--------|----------|--------|--------|---------|
| 1     | 16.398 | 14079940 | 28.461 | 470087 | 32.303  |
| 2     | 20.149 | 10924125 | 22.082 | 366408 | 25.179  |
| 3     | 24.887 | 11543529 | 23.334 | 347842 | 23.903  |
| 4     | 33.669 | 12923700 | 26.124 | 270900 | 18.616  |

**Chiral HPLC spectrum of chiral 3v**

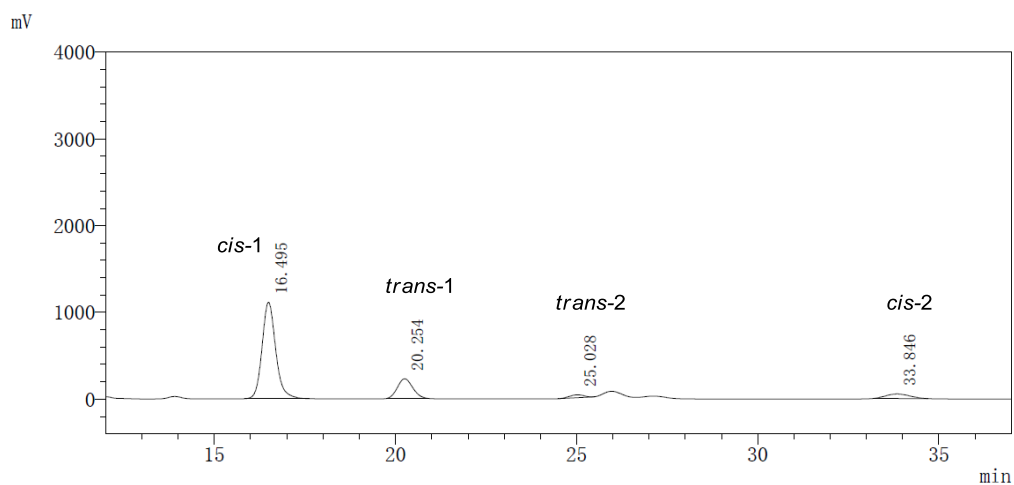

<Peak Results>

Ch2 254nm

| Index | Time   | Area     | Area%  | Height  | Height% |
|-------|--------|----------|--------|---------|---------|
| 1     | 16.495 | 29180125 | 74.717 | 1113082 | 78.147  |
| 2     | 20.254 | 6570691  | 16.824 | 225631  | 15.841  |
| 3     | 25.028 | 936715   | 2.398  | 33247   | 2.334   |
| 4     | 33.846 | 2366867  | 6.060  | 52388   | 3.678   |

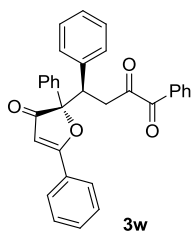

**Chiral HPLC spectrum of racemic 3w**

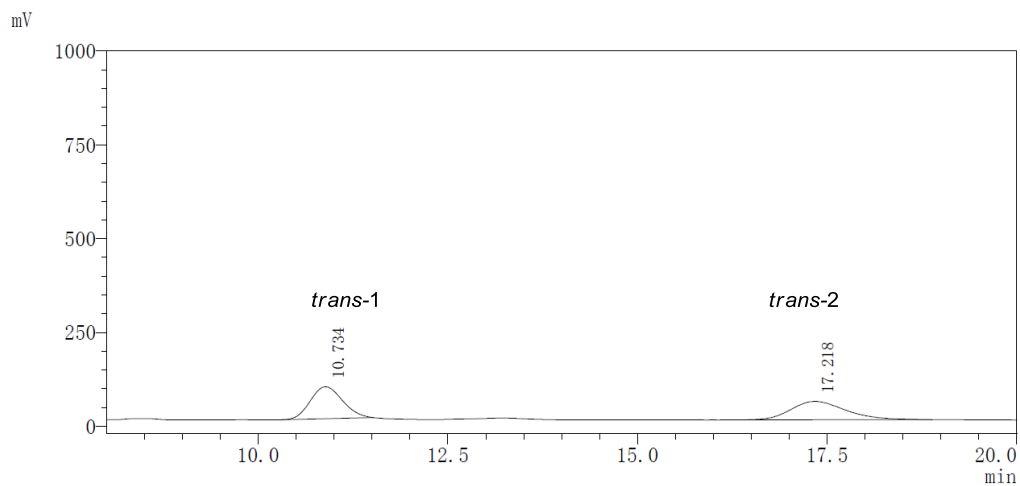

<Peak Results>

| Ch2 210nm |        |         |        |        |         |
|-----------|--------|---------|--------|--------|---------|
| Index     | Time   | Area    | Area%  | Height | Height% |
| 1         | 10.734 | 2814924 | 50.721 | 92741  | 68.821  |
| 2         | 17.218 | 2389156 | 49.279 | 68194  | 31.179  |

**Chiral HPLC spectrum of chiral 3w**

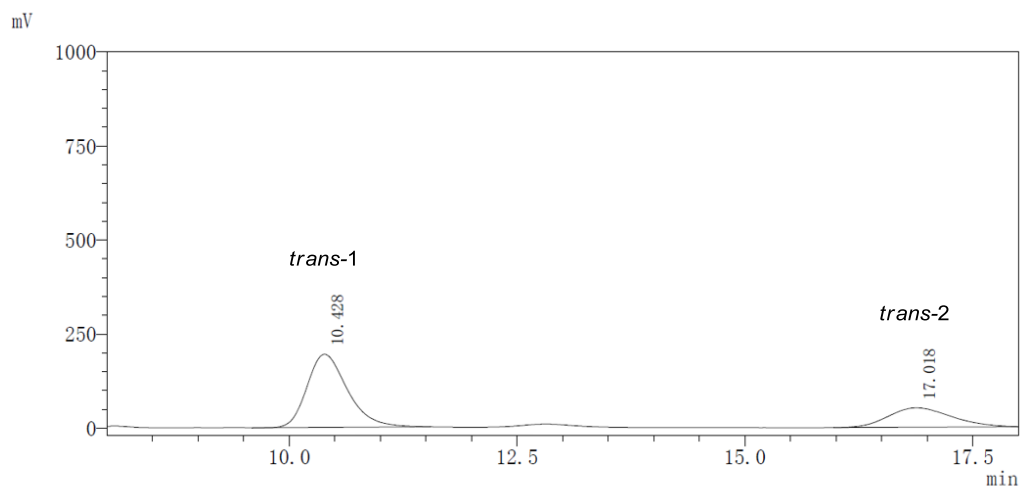

<Peak Results>

| Ch2 210nm |        |         |        |        |         |
|-----------|--------|---------|--------|--------|---------|
| Index     | Time   | Area    | Area%  | Height | Height% |
| 1         | 10.428 | 8912815 | 70.664 | 194379 | 79.036  |
| 2         | 17.018 | 4893150 | 29.336 | 51559  | 20.964  |

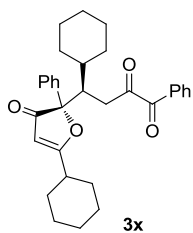

**Chiral HPLC spectrum of racemic 3x**

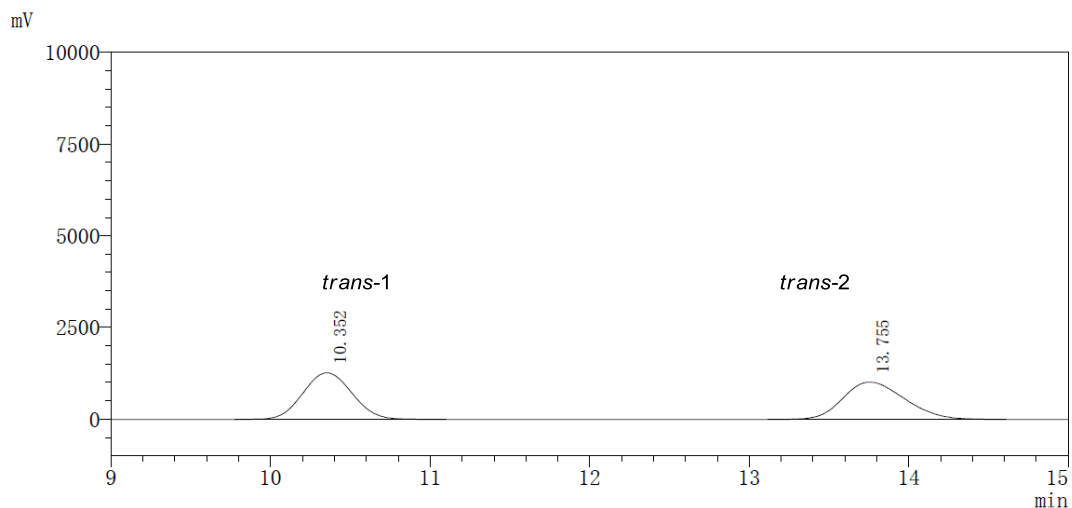

<Peak Results>

| Index | Time   | Area     | Area%  | Height  | Height% |
|-------|--------|----------|--------|---------|---------|
| 1     | 10.352 | 27048935 | 49.750 | 1270697 | 55.517  |
| 2     | 13.755 | 27320326 | 50.250 | 1018164 | 44.483  |

**Chiral HPLC spectrum of chiral 3x**

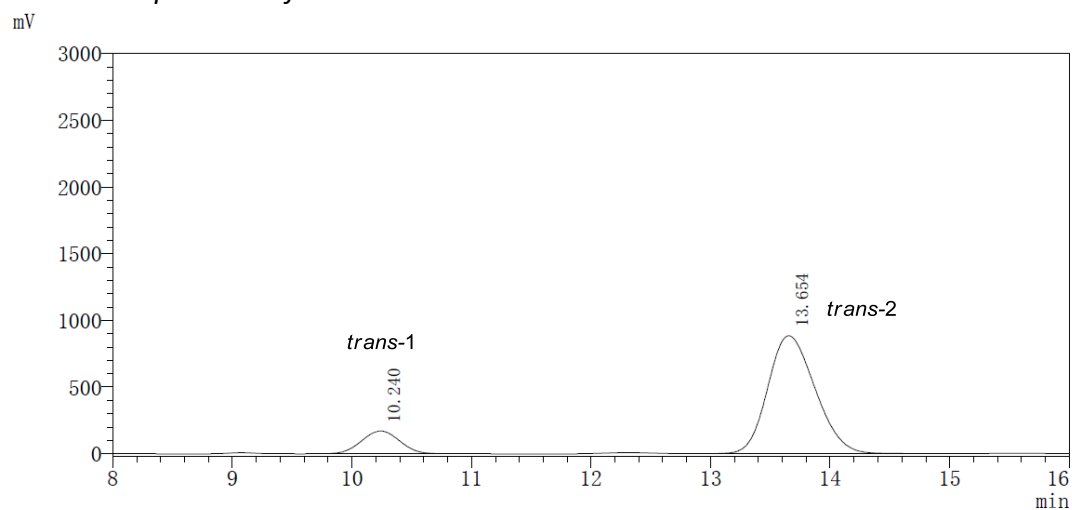

<Peak Results>

| Index | Time   | Area     | Area%  | Height | Height% |
|-------|--------|----------|--------|--------|---------|
| 1     | 10.240 | 3718972  | 18.256 | 169191 | 16.060  |
| 2     | 13.654 | 24335409 | 81.744 | 884311 | 83.940  |



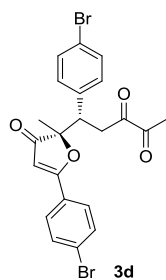

Chiral HPLC spectrum of racemic **3d**

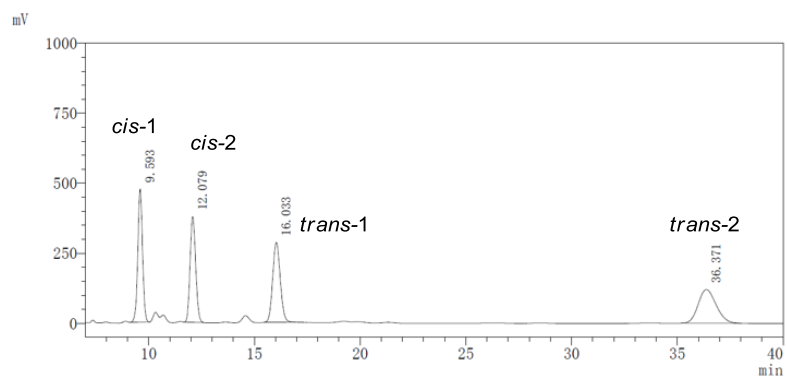

<Peak Results>

Ch2 210nm

| Index | Time   | Area    | Area%  | Height | Height% |
|-------|--------|---------|--------|--------|---------|
| 1     | 9.593  | 7381119 | 25.934 | 475466 | 37.822  |
| 2     | 12.079 | 6938466 | 24.379 | 376738 | 29.968  |
| 3     | 16.033 | 7073087 | 24.852 | 284930 | 22.665  |
| 4     | 36.371 | 7068432 | 24.835 | 119991 | 9.545   |

Chiral HPLC spectrum of chiral **3d**

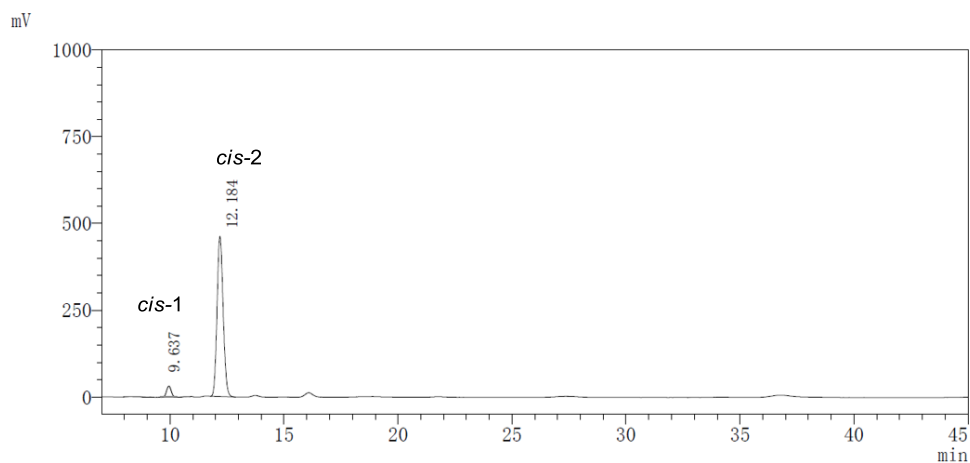

<Peak Results>

Ch2 210nm

| Index | Time   | Area    | Area%  | Height | Height% |
|-------|--------|---------|--------|--------|---------|
| 1     | 9.637  | 918154  | 7.306  | 48686  | 7.548   |
| 2     | 12.184 | 8553347 | 92.694 | 461226 | 92.452  |

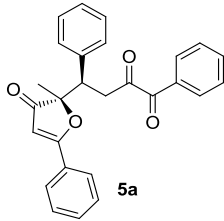

**Chiral HPLC spectrum of racemic 5a**

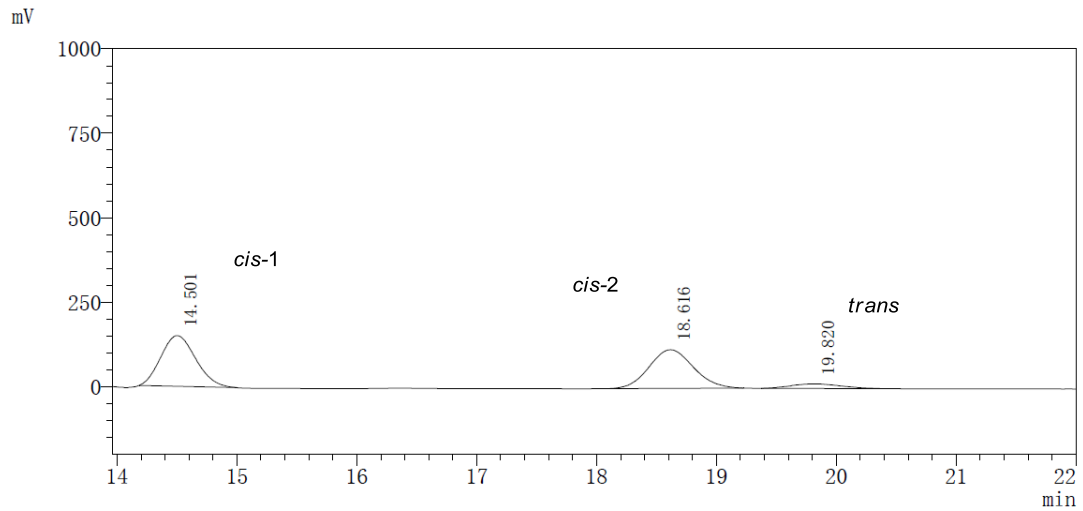

<Peak Results>

Ch2 210nm

| Index | Time   | Area    | Area%  | Height | Height% |
|-------|--------|---------|--------|--------|---------|
| 1     | 14.501 | 3028051 | 47.574 | 149826 | 53.868  |
| 2     | 18.616 | 2938899 | 46.173 | 114424 | 41.140  |
| 3     | 19.820 | 397987  | 6.253  | 13886  | 4.993   |

**Chiral HPLC spectrum of chiral 5a**

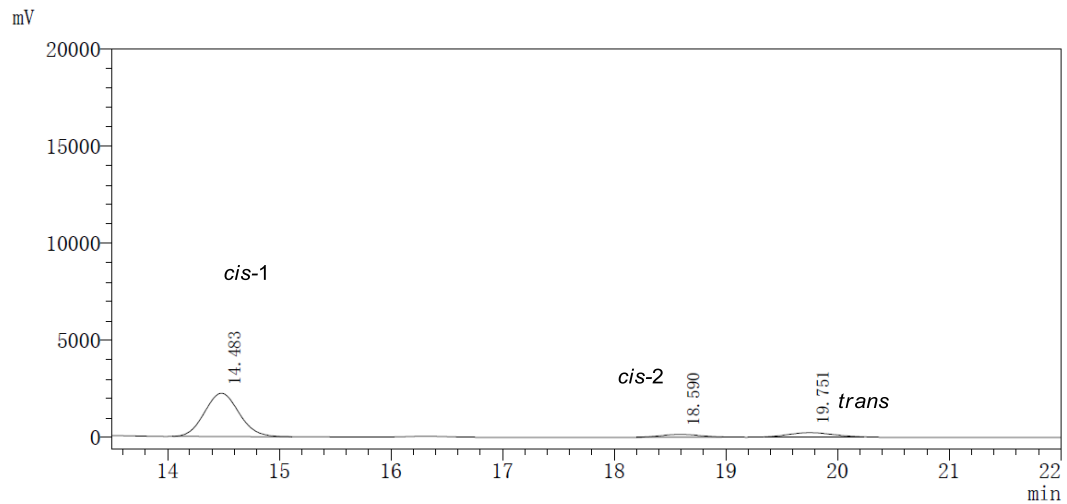

<Peak Results>

Ch2 210nm

| Index | Time   | Area     | Area%  | Height  | Height% |
|-------|--------|----------|--------|---------|---------|
| 1     | 14.483 | 47816122 | 83.957 | 2227712 | 86.230  |
| 2     | 18.590 | 3333800  | 5.854  | 139727  | 5.409   |
| 3     | 19.751 | 5803097  | 10.189 | 216019  | 8.362   |

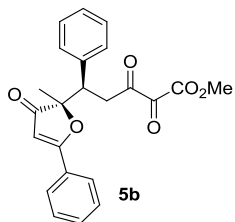

**Chiral HPLC spectrum of racemic 5b**

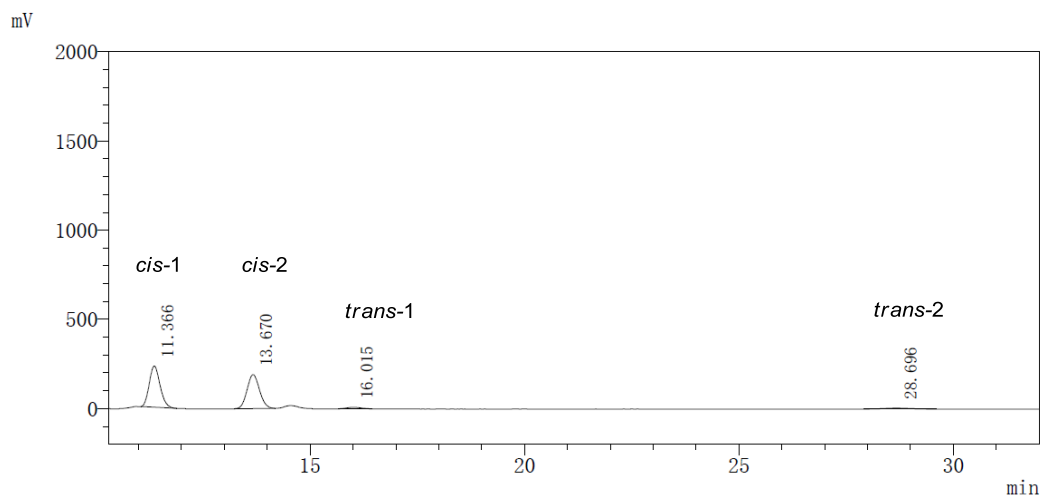

<Peak Results>

Ch2 210nm

| Index | Time   | Area    | Area%  | Height | Height% |
|-------|--------|---------|--------|--------|---------|
| 1     | 11.366 | 4051154 | 48.965 | 230886 | 53.076  |
| 2     | 13.670 | 3836399 | 46.370 | 190496 | 43.792  |
| 3     | 16.015 | 190791  | 2.306  | 8783   | 2.019   |
| 4     | 28.696 | 195152  | 2.359  | 4842   | 1.113   |

**Chiral HPLC spectrum of chiral 5b**

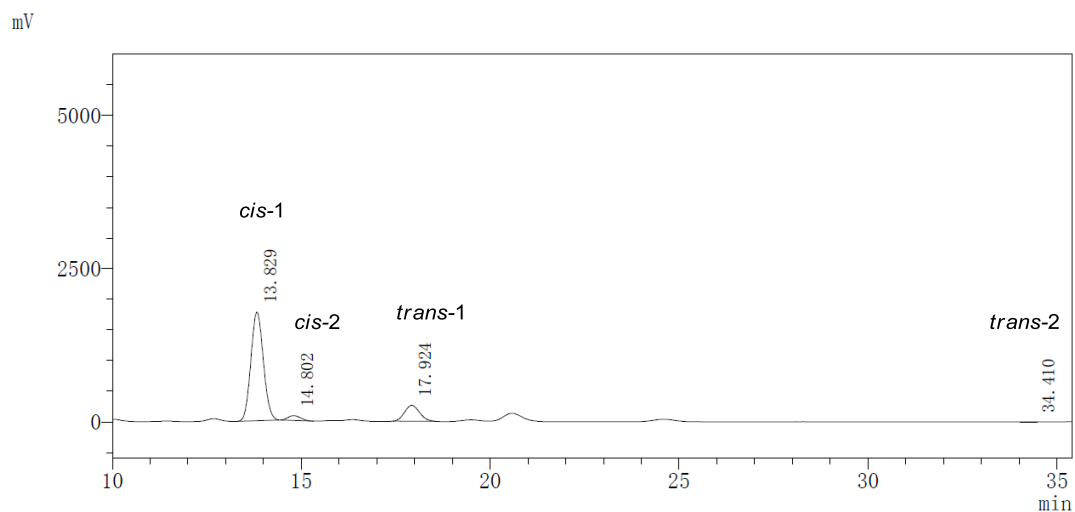

<Peak Results>

Ch2 210nm

| Index | Time   | Area     | Area%  | Height  | Height% |
|-------|--------|----------|--------|---------|---------|
| 1     | 13.829 | 40906838 | 81.961 | 1774221 | 84.011  |
| 2     | 14.802 | 1849754  | 3.706  | 78211   | 3.703   |
| 3     | 17.924 | 7153438  | 14.146 | 259372  | 12.282  |
| 4     | 34.410 | 283      | 0.187  | 79      | 0.004   |

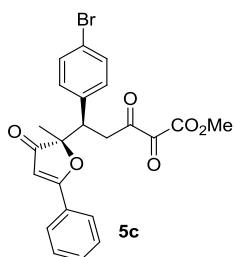

### Chiral HPLC spectrum of racemic **5c**

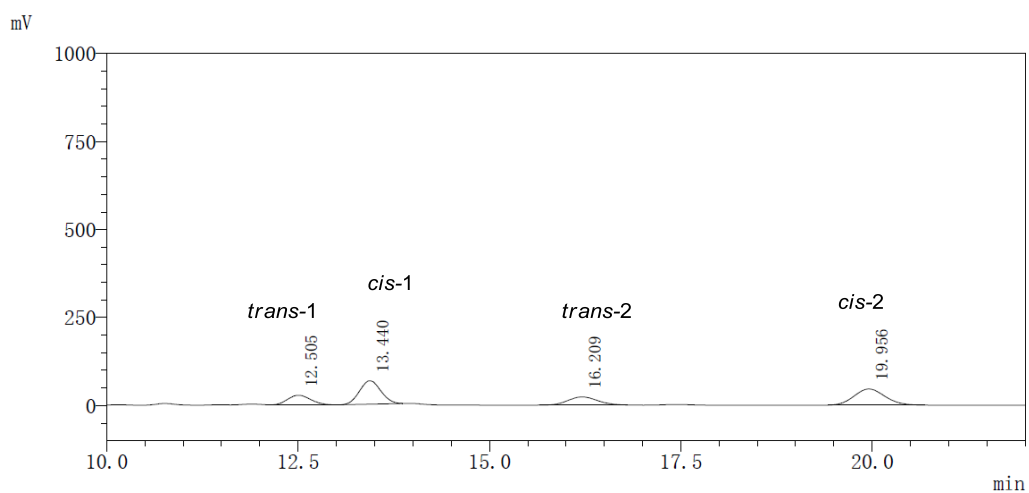

<Peak Results>

Ch2 254nm

| Index | Time   | Area    | Area%  | Height | Height% |
|-------|--------|---------|--------|--------|---------|
| 1     | 12.505 | 554136  | 14.751 | 27066  | 16.626  |
| 2     | 13.440 | 1285426 | 34.218 | 66524  | 40.864  |
| 3     | 16.209 | 622419  | 16.569 | 23331  | 14.332  |
| 4     | 19.956 | 1294634 | 34.463 | 45873  | 28.178  |

### Chiral HPLC spectrum of chiral **5c**

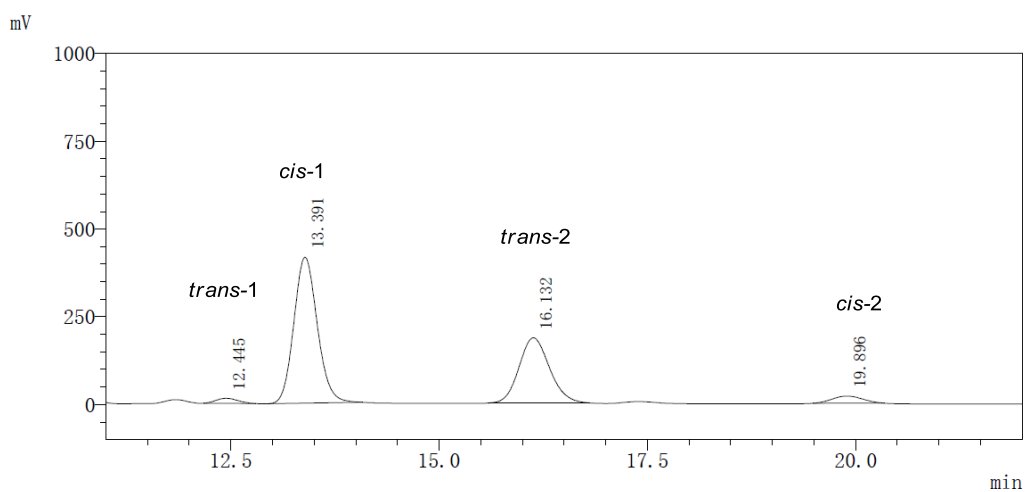

<Peak Results>

Ch2 254nm

| Index | Time   | Area    | Area%  | Height | Height% |
|-------|--------|---------|--------|--------|---------|
| 1     | 12.445 | 259934  | 1.905  | 14439  | 2.268   |
| 2     | 13.391 | 8158159 | 59.802 | 416254 | 65.378  |
| 3     | 16.132 | 4712323 | 34.543 | 185650 | 29.159  |
| 4     | 19.896 | 511612  | 3.750  | 20345  | 3.195   |

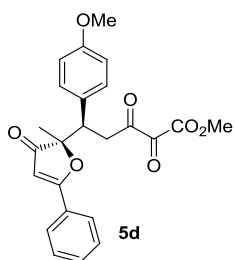

### Chiral HPLC spectrum of racemic **5d**

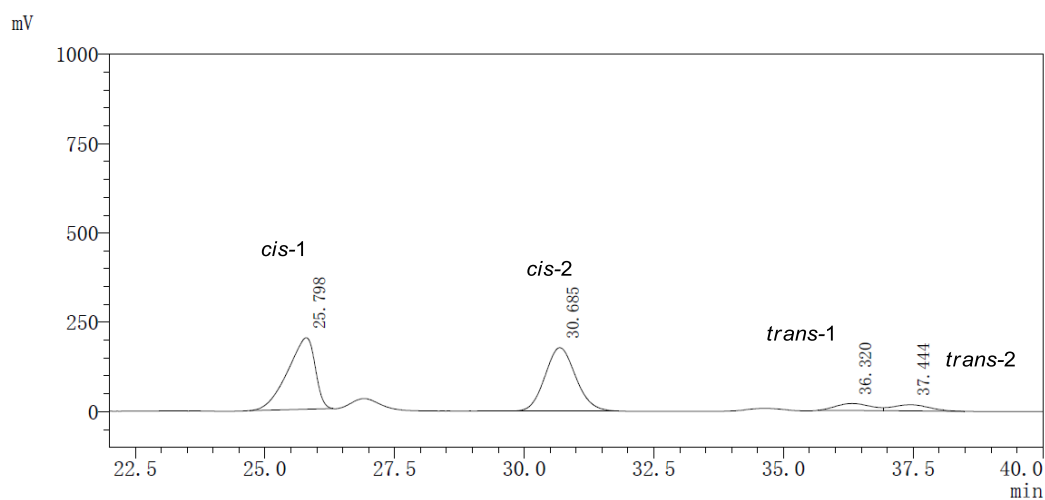

<Peak Results>

| Ch2 210nm |        |         |        |        |         |
|-----------|--------|---------|--------|--------|---------|
| Index     | Time   | Area    | Area%  | Height | Height% |
| 1         | 25.798 | 7375602 | 45.004 | 200210 | 48.341  |
| 2         | 30.685 | 7242771 | 44.193 | 176758 | 42.679  |
| 3         | 36.320 | 915828  | 5.588  | 19631  | 4.740   |
| 4         | 37.444 | 854683  | 5.215  | 17561  | 4.240   |

### Chiral HPLC spectrum of chiral **5d**

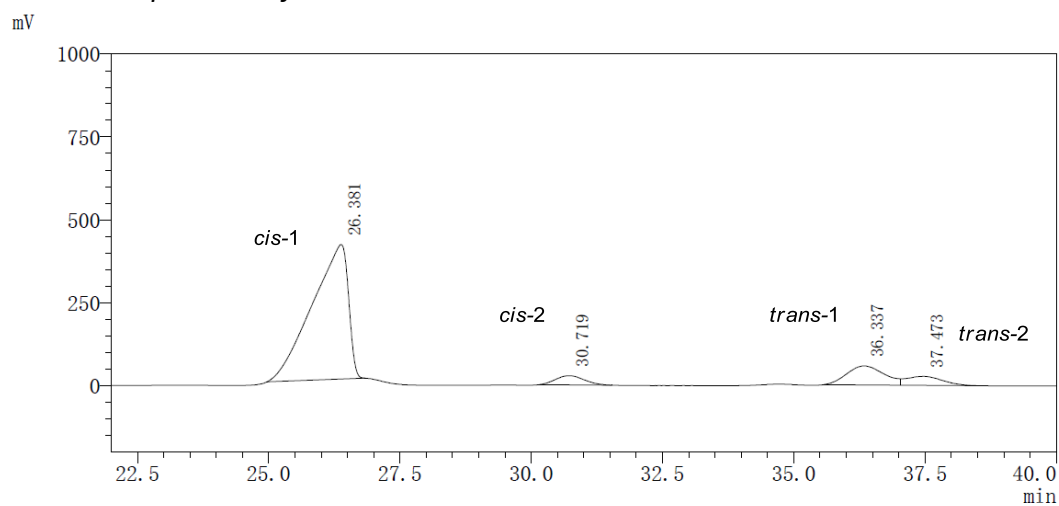

<Peak Results>

| Ch2 210nm |        |          |        |        |         |
|-----------|--------|----------|--------|--------|---------|
| Index     | Time   | Area     | Area%  | Height | Height% |
| 1         | 26.381 | 19562858 | 78.901 | 405787 | 78.273  |
| 2         | 30.719 | 1050891  | 4.238  | 27843  | 5.371   |
| 3         | 36.337 | 2871367  | 11.581 | 57568  | 11.104  |
| 4         | 37.473 | 1309104  | 5.280  | 27230  | 5.252   |

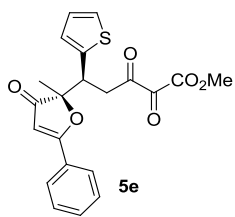

**Chiral HPLC spectrum of racemic 5e**

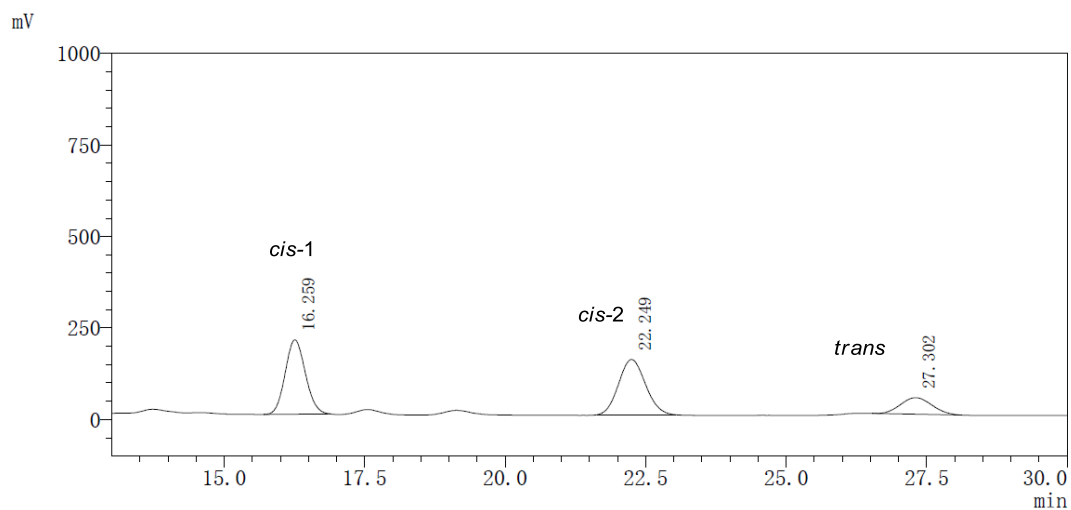

<Peak Results>

Ch2 210nm

| Index | Time   | Area    | Area%  | Height | Height% |
|-------|--------|---------|--------|--------|---------|
| 1     | 16.259 | 5071184 | 42.900 | 203312 | 50.904  |
| 2     | 22.249 | 4996822 | 42.270 | 150874 | 37.775  |
| 3     | 27.302 | 1753061 | 14.830 | 45218  | 11.321  |

**Chiral HPLC spectrum of chiral 5e**

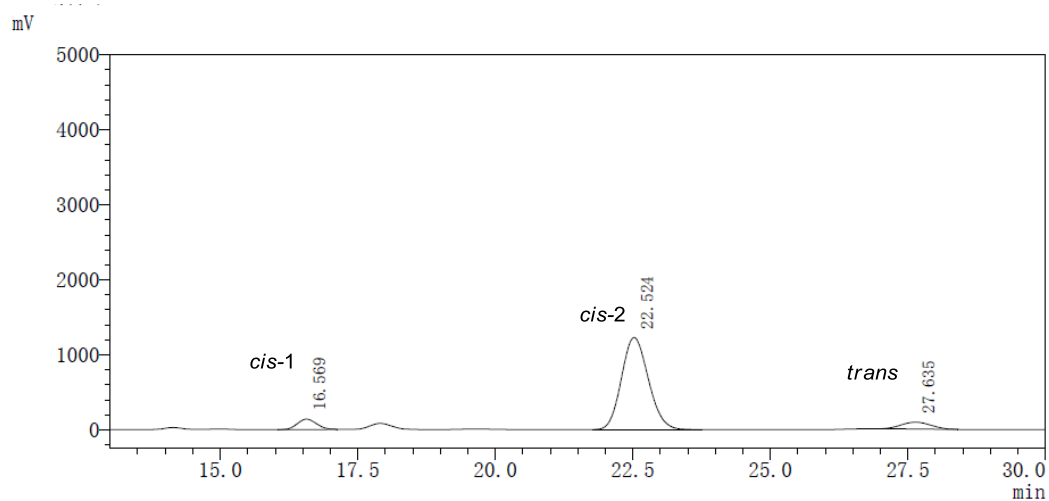

<Peak Results>

Ch2 210nm

| Index | Time   | Area     | Area%  | Height  | Height% |
|-------|--------|----------|--------|---------|---------|
| 1     | 16.569 | 3387318  | 6.944  | 139681  | 9.564   |
| 2     | 22.524 | 41959294 | 86.015 | 1228905 | 84.141  |
| 3     | 27.635 | 3434730  | 7.041  | 91941   | 6.295   |

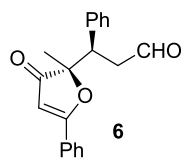

**Chiral HPLC spectrum of racemic 6**

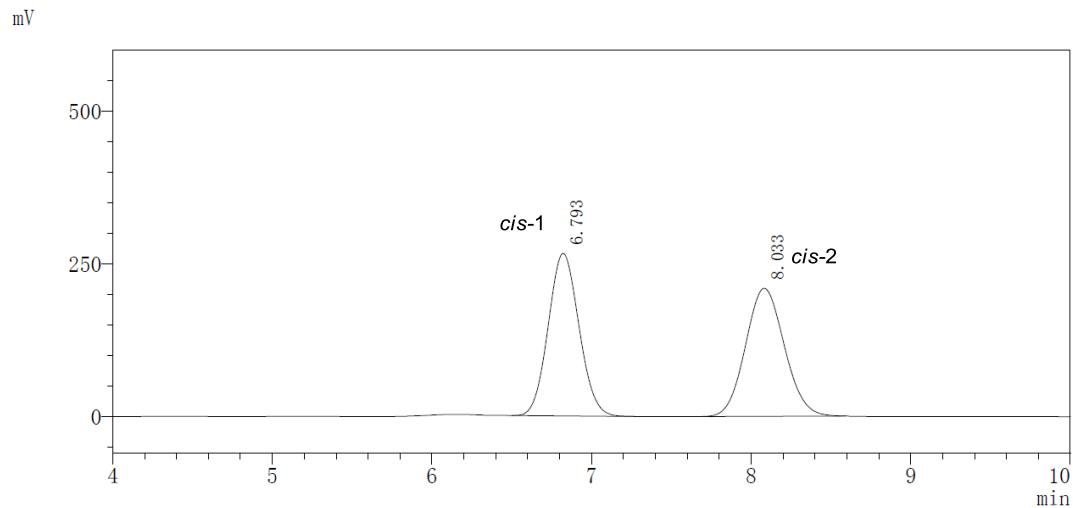

<Peak Results>

| Index | Time  | Area    | Area/% | Height | Height/% |
|-------|-------|---------|--------|--------|----------|
| 1     | 6.793 | 4821234 | 50.572 | 265746 | 57.368   |
| 2     | 8.033 | 4813213 | 49.428 | 209642 | 42.632   |

**Chiral HPLC spectrum of chiral 6**

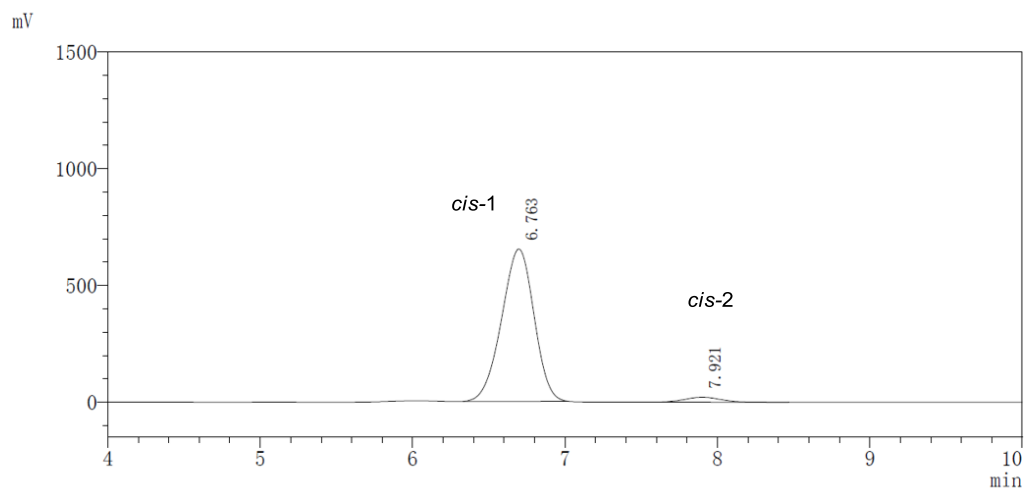

<Peak Results>

| Index | Time  | Area    | Area/% | Height | Height/% |
|-------|-------|---------|--------|--------|----------|
| 1     | 6.763 | 9428325 | 96.731 | 729316 | 96.352   |
| 2     | 7.921 | 281938  | 3.269  | 34291  | 3.648    |

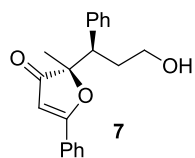

Chiral HPLC spectrum of racemic **7**

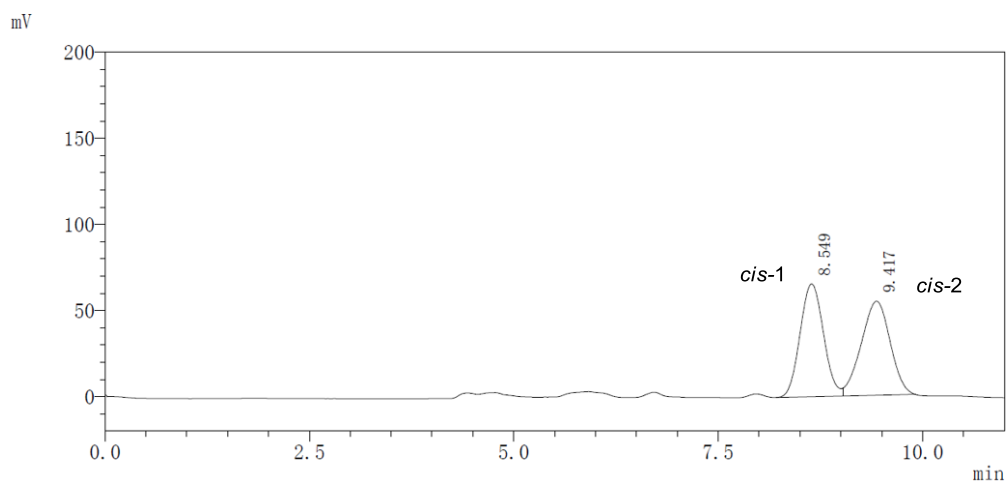

<Peak Results>

| Ch2 210nm |       |         |        |        |          |
|-----------|-------|---------|--------|--------|----------|
| Index     | Time  | Area    | Area/% | Height | Height/% |
| 1         | 8.549 | 1582146 | 49.195 | 67219  | 51.846   |
| 2         | 9.417 | 1698214 | 50.905 | 62194  | 48.154   |

Chiral HPLC spectrum of chiral **7**

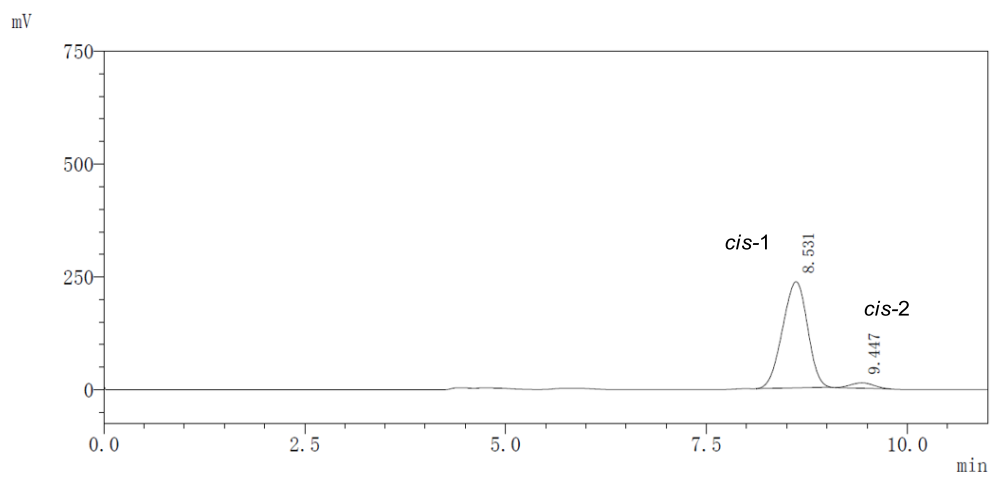

<Peak Results >

| Ch2 210nm |       |         |        |        |          |
|-----------|-------|---------|--------|--------|----------|
| Index     | Time  | Area    | Area/% | Height | Height/% |
| 1         | 8.531 | 5319234 | 95.827 | 381345 | 95.539   |
| 2         | 9.447 | 221741  | 4.173  | 27921  | 4.461    |



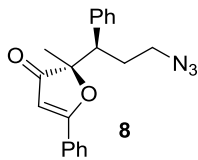

**Chiral HPLC spectrum of racemic **8****

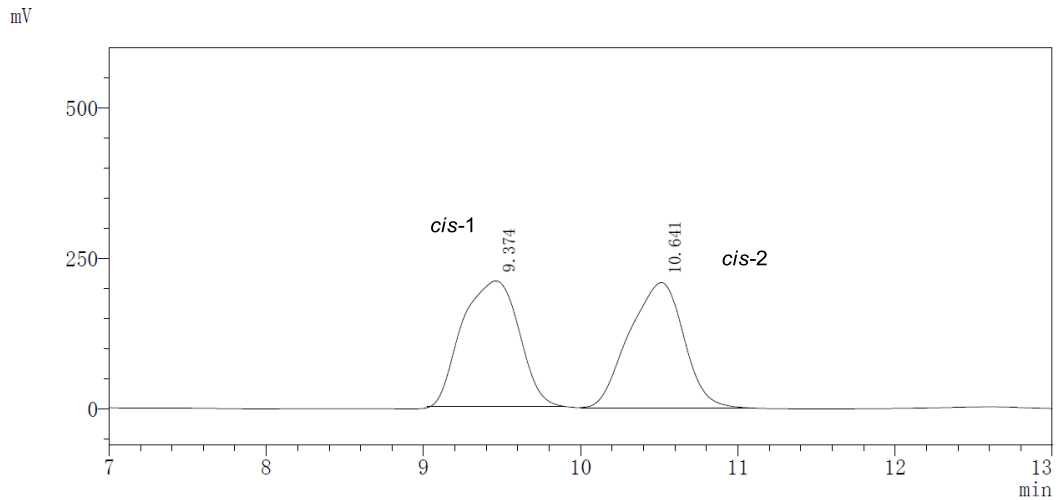

<Peak Results>

| Ch2 210nm |        |         |        |        |          |
|-----------|--------|---------|--------|--------|----------|
| Index     | Time   | Area    | Area/% | Height | Height/% |
| 1         | 9.374  | 4928729 | 50.243 | 173492 | 50.428   |
| 2         | 10.641 | 4942814 | 49.757 | 172593 | 49.572   |

**Chiral HPLC spectrum of chiral **8****

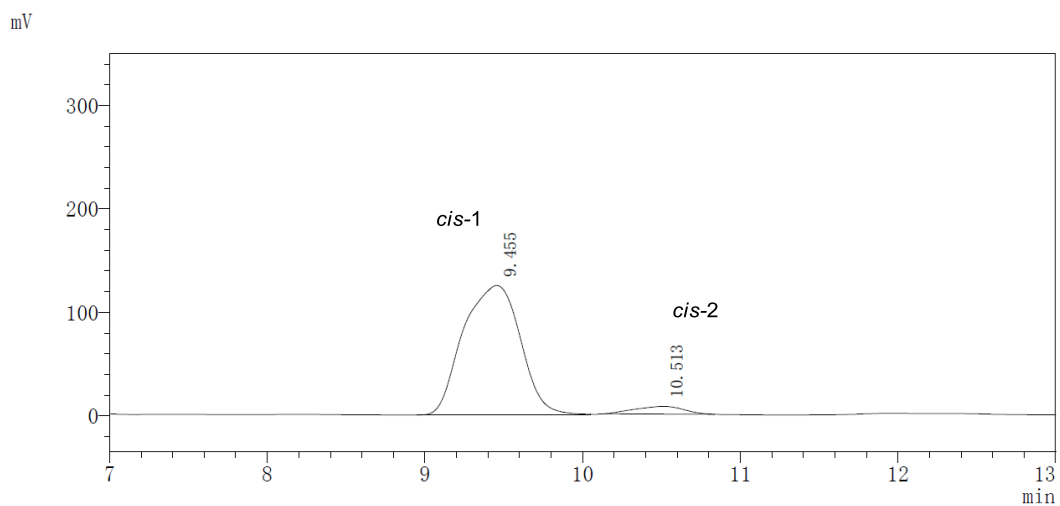

<Peak Results>

| Ch2 210nm |        |         |        |           |          |
|-----------|--------|---------|--------|-----------|----------|
| Index     | Time   | Area    | Area/% | Height/mV | Height/% |
| 1         | 9.455  | 3791235 | 95.428 | 174924    | 94.451   |
| 2         | 10.513 | 238524  | 4.572  | 8795      | 5.549    |

## VIII. Reference

1. J. Liu, D. K. Das, G. Zhang, S. Yang, H. Zhang, X. Fang, *Org. Lett.*, 2018, **20**, 64.
2. S. Fredrich, R. Göstl, M. Herder, L. Grubert, S. Hecht, *Angew. Chem., Int. Ed.*, 2016, **55**, 1208.
3. S. Chen, X. Li, H. Zhao, B. Li, *B. J. Org. Chem.*, 2014, **79**, 4137.
